# Supplementary material for: Advancements in nanosensors for detecting pathogens in healthcare environments
Source: Royal Society of Chemistry journal article supplement (doi:10.1039/d4en00381k), 2024-01-01
Supplement: d4en00381k1.xlsx [file d4en00381k1.xlsx]

## Sheet: Sheet1
Authors	Article Title	Source Title	Author Keywords	Keywords Plus	Abstract	Publication Year
Hanafiah, A; Sukri, A; Yusoff, H; Chan, CS; Hazrin-Chong, NH; Salleh, SA; Neoh, HM	Insights into the Microbiome and Antibiotic Resistance Genes from Hospital Environmental Surfaces: A Prime Source of Antimicrobial Resistance	ANTIBIOTICS-BASEL	microbiome; antibiotic resistance genes; hospital environment; 16S rRNA; metagenome	CARE-ASSOCIATED INFECTIONS; COLISTIN	Hospital environmental surfaces are potential reservoirs for transmitting hospital-associated pathogens. This study aimed to profile microbiomes and antibiotic resistance genes (ARGs) from hospital environmental surfaces using 16S rRNA amplicon and metagenomic sequencing at a tertiary teaching hospital in Malaysia. Samples were collected from patient sinks and healthcare staff counters at surgery…	2024
Jinadatha, C; Navarathna, T; Negron-Diaz, J; Ghamande, G; Corona, BA; Adrianza, A; Coppin, JD; Choi, H; Chatterjee, P	Understanding the significance of microbiota recovered from health care surfaces	AMERICAN JOURNAL OF INFECTION CONTROL	Pathogens; Hospital surfaces; Health care-associated infections; Infection; Diseases	CLOSTRIDIUM-DIFFICILE; DISINFECTION; TRANSMISSION; PATHOGENS	Background: Microbial contamination of hospital surfaces remains despite adherence to routine disinfection. Our study demonstrates bioburden from various types of hospital high-touch surfaces and the pathogenicity of all bacteria recovered. Methods: Several high-touch hospital surfaces from a single medical-surgical unit were sampled and cultured using replicate organism detection and counting (R…	2024
Ibrahim, DR; Saadi, AT; Yahya, NB; Ibrahim, MS; Saeed, AY; Abdulaziz, SS; Hasqyal, RY; Alarsalani, BK; Ibrahim, KS	Retrospective analysis of pediatric sepsis and the burden of antimicrobial resistance in Duhok, Kurdistan Region of Iraq	FRONTIERS IN PHARMACOLOGY	sepsis; pediatric; retrospective; antimicrobial resistance; Duhok-Iraq	INTENSIVE-CARE-UNIT; LATE-ONSET SEPSIS; NEONATAL SEPSIS; MORTALITY	Introduction: Sepsis is a life-threatening complication in pediatric patients. This study primarily aimed to investigate sepsis-causing bacteria and their antimicrobial resistance profile and check the change in the antimicrobial resistance trend for some selected bacteria. In addition, we evaluated the incidence of sepsis, the related mortality rate, and the effectiveness and outcome of the trea…	2024
Grech, AK; Foo, CT; Paul, E; Aung, AK; Yu, CSA	Epidemiological trends of respiratory tract pathogens detected via mPCR in Australian adult patients before COVID-19	BMC INFECTIOUS DISEASES	Respiratory tract infections; Seasonal distribution of respiratory pathogens; Viral trends	COMMUNITY-ACQUIRED PNEUMONIA; SYNCYTIAL VIRUS-INFECTION; MORTALITY; ETIOLOGY	Background Respiratory tract infections (RTIs) are a major global health burden due to their high morbidity and mortality. This retrospective study described the epidemiology of respiratory pathogens in adults over a 5-year period at an Australian tertiary healthcare network. Methods All multiplex reverse transcription polymerase chain reaction respiratory samples taken between the 1st of Novembe…	2024
Abafogi, AT; Lee, J; Kim, J; Lee, SW; Jang, S; Park, S	Automated sepsis detection with vancomycin- and allantoin-polydopamine magnetic nanoparticles	SCIENTIFIC REPORTS	Sepsis; Molecular diagnostics; IMS; Polydopamine; Vancomycin; Allantoin; Automation	REAL-TIME PCR; MICROFLUIDIC DEVICES; BLOOD; BACTERIAL; DNA; PURIFICATION; MORTALITY; ASSAY	Rapid and accurate identification of the bacteria responsible for sepsis is paramount for effective patient care. Molecular diagnostic methods, such as polymerase chain reaction (PCR), encounter challenges in sepsis due to inhibitory compounds in the blood, necessitating their removal for precise analysis. In this study we present an innovative approach that utilizes vancomycin (Van) and allantoi…	2024
Boutin, S; Scherrer, M; Späth, I; Kocer, K; Heeg, K; Nurjadi, D	Cross-contamination of carbapenem-resistant Gram-negative bacteria between patients and the hospital environment in the first year of a newly built surgical ward	JOURNAL OF HOSPITAL INFECTION	Carbapenem-resistant; Enterobacterales; Pseudomonas aeruginosa; Hospital wastewater; environment; Nosocomial transmission; Multi-drug-resistant Gram; negatives; Cross-contamination		Background: Transmission and outbreaks of carbapenem-resistant Gram-negative bacteria (CRGN) in hospitals are often associated with contamination of the wastewater environment. We performed a prospective observational study to investigate the colonization of the hospital wastewater environment during the first year of occupancy of the surgical intermediate and intensive care units of a newly cons…	2024
Sanikhani, R; Akbari, M; Hosseinzadeh, M; Siavash, M; Badmasti, F; Solgi, H	Outbreak of colistin and carbapenem-resistant Klebsiella pneumoniae ST16 co-producing NDM-1 and OXA-48 isolates in an Iranian hospital	BMC MICROBIOLOGY	Ventilator-associated pneumonia; Carbapenem-resistant Klebsiella pneumoniae; Colistin resistance; Carbapenemase genes; Sequence type 16	VIRULENCE GENE; COVID-19	Background Colistin and carbapenem-resistant Klebsiella pneumoniae (Col-CRKP) represent a significant and constantly growing threat to global public health. We report here an outbreak of Col-CRKP infections during the fifth wave of COVID-19 pandemic. Methods The outbreak occurred in an intensive care unit with 22 beds at a teaching university hospital, Isfahan, Iran. We collected eight Col-CRKP s…	2024
Hijazi, MM; Siepmann, T; El-Battrawy, I; Schröttner, P; Podlesek, D; Schackert, G; Juratli, TA; Eyüpoglu, IY; Filis, A	The importance of the bacterial spectrum in the clinical diagnostics and management of patients with spontaneous pyogenic spondylodiscitis and isolated spinal epidural empyema: a 20-year cohort study at a single spine center	BMC INFECTIOUS DISEASES	Spondylodiscitis; Isolated spinal epidural empyema; Osteomyelitis; Bacterial spectrum; Staphylococcus aureus	EMERGENCY-DEPARTMENT PATIENTS; VERTEBRAL OSTEOMYELITIS; SURGICAL-MANAGEMENT; EPIDEMIOLOGY; INFECTIONS; ABSCESS	Background Personalized clinical management of spondylodiscitis (SD) and isolated spinal epidural empyema (ISEE) is challenging due to limited evidence of microbiologic findings and their clinical impact during the clinical course of the disease. We aimed to characterize clinico-microbiological and imaging phenotypes of SD and ISEE to provide useful insights that could improve outcomes and potent…	2024
Rankin, DA; Walters, MS; Caicedo, L; Gable, P; Moulton-Meissner, HA; Chan, ALS; Burks, A; Edwards, K; Mcallister, G; Kent, A; Halpin, AL; Moore, C; Mclemore, T; Thomas, L; Dotson, NQ; Chu, AK	Concurrent transmission of multiple carbapenemases in a long-term acute-care hospital	INFECTION CONTROL AND HOSPITAL EPIDEMIOLOGY		RESISTANT ENTEROBACTERIACEAE; PSEUDOMONAS-AERUGINOSA; UNITED-STATES; OUTBREAK; ORGANISMS; RESERVOIR	Objective:We investigated concurrent outbreaks of Pseudomonas aeruginosa carrying blaVIM (VIM-CRPA) and Enterobacterales carrying blaKPC (KPC-CRE) at a long-term acute-care hospital (LTACH A).Methods:We defined an incident case as the first detection of blaKPC or blaVIM from a patient's clinical cultures or colonization screening test. We reviewed medical records and performed infection control a…	2024
Ma, H; Xu, JW; Zhang, YH; Zhang, RY; Wu, J	Relevance and antimicrobial resistance profile of Klebsiella pneumoniae in neonatal sepsis	JOURNAL OF MATERNAL-FETAL & NEONATAL MEDICINE	Newborn; septicemia; Klebsiella pneumoniae; drug resistance; resistance genotypes		Background: Newborns are particularly susceptible to infection in hospitals, with neonatal sepsis being the most common infection symptom and the third leading cause of neonatal death. Klebsiella pneumoniae is a gram-negative bacterium of Enterobacteriaceae, which is a common pathogen of neonatal septicemia. In this study, we will analyze and evaluate the current status, clinical characteristics,…	2024
Sharma, BK; Sharma, BP; Kunwar, A; Basnet, N; Magar, PD; Adhikari, S	Prevalence of Extended Spectrum β-Lactamase Producers (ESBLs) with antibiotic resistance pattern of Gram negative pathogenic bacteria isolated from door handles in hospitals of Pokhara, Western Nepal	JOURNAL OF GENETIC ENGINEERING AND BIOTECHNOLOGY	Contamination; Drug-resistant; Door-Handles; ESBLs; Hospitals	ESCHERICHIA-COLI; ENTEROBACTERIACEAE; TRANSMISSION; CHILDREN	BackgroundThe presence of drug-resistant Gram-negative pathogenic bacteria and Extended Spectrum beta-Lactamase Producers (ESBLs) in hospital associated fomites like door handles can serve as vehicles in transmission and may be the key factor in epidemiology of ESBL producing bacterial infection not only in a hospital setting but also in the community. The aim of this study was to determine the p…	2023
Guo, HB; Huang, HL; Li, YY	Detection and homology analysis of carbapenem resistant Acinetobacter baumannii resistance gene	FRONTIERS IN CELLULAR AND INFECTION MICROBIOLOGY	carbapenem resistant Acinetobacter baumannii; drug resistance gene; pulsed field gel electrophoresis; homology; infection microbiology	INFECTIONS	ObjectiveTo explore the carrying status and homology of carbapenem resistant Acinetobacter baumannii (CRAB) in our hospital. MethodsFrom January 2015 to December 2017, 52 strains of acinetobacter baumannii isolated from the bacteria room of the clinical laboratory of Baogang hospital in Inner Mongolia were selected as the research object. K-B disk diffusion method and Vitek-2 were used to determi…	2023
Petrakis, V; Panopoulou, M; Rafailidis, P; Lemonakis, N; Lazaridis, G; Terzi, I; Papazoglou, D; Panagopoulos, P	The Impact of the COVID-19 Pandemic on Antimicrobial Resistance and Management of Bloodstream Infections	PATHOGENS	COVID-19 pandemic; antimicrobial resistance; infectious disease consultation; multidrug-resistant bacteria; infection prevention and control group; antibiotic stewardship	CLINICAL CHARACTERISTICS; HOSPITALIZED-PATIENTS; DISEASE CONSULTATION; COINFECTION	Introduction: The pressure of the COVID-19 pandemic on healthcare systems led to limited roles of infectious diseases services, increased rates of irrational use of antimicrobials, and incidence of infections by multidrug-resistant microorganisms. The aim of the present study is to evaluate the incidence of antimicrobial resistance and the management of bloodstream infections before and during th…	2023
Luchian, N; Eva, L; Dabija, MG; Drugus, D; Duceac, M; Mitrea, G; Marcu, C; Popescu, MR; Duceac, LD	HEALTH-ASSOCIATED INFECTIONS IN A HOSPITAL IN THE NORTH-EAST REGION OF ROMANIA-A MULTIDISCIPLINARY APPROACH	ROMANIAN JOURNAL OF ORAL REHABILITATION	phenomenon healthcare-associated infections; neurosurgery; health management; neuromotor rehabilitation	NEUROSURGERY; MANAGEMENT	Healthcare-associated infections (HAIs), also known under other names such as: nosocomial infections or intrahospital infections, are a major public health problem, affecting both patients, medical personnel involved in their care , and non-medical support personnel. Material and method: The study is retrospective, longitudinal, descriptive, observational, carried out in the Emergency Clinic Hosp…	2023
Patel, T; Pajai, S; Patel, N; Patel, P	Leptospirosis Manifesting as HELLP (Hemolysis, Elevated Liver Enzymes, and Low Platelets) Syndrome: A Rare Case of Leptospirosis During Pregnancy	CUREUS JOURNAL OF MEDICAL SCIENCE	acute fatty liver of pregnancy; spirochete; zoonotic infection; hellp syndrome; leptospirosis		Pregnancy is characterized by a reduced immune response, making pregnant women more susceptible to infections. We present a case of a 24-year-old woman in her second pregnancy who arrived at the hospital at 36 weeks gestation in active labor. The patient had received regular antenatal care including routine prenatal check-ups, screenings, and appropriate vaccinations. She complained of abdominal …	2023
Xie, LJ; Ding, LY; Tang, L; Yang, ZM; Wu, D; Wang, WJ; Mao, JH; Shi, L; Liu, C; Duan, LF; Xu, JH; Zhou, Q; Sun, JT; Ding, XY	A real-world cost-effectiveness study of vancomycin versus linezolid for the treatment of late-onset neonatal sepsis in the NICU in China	BMC HEALTH SERVICES RESEARCH	Neonatal sepsis; Vancomycin; Linezolid; Real-world; Cost-effectiveness analysis	UTILITY	Background and objectiveCurrently, the detection rates of methicillin-resistant S. aureus (MRSA) and methicillin-resistant coagulase-negative staphylococci (MRCoNS) in the blood cultures of neonates with sepsis exceed the national average drug resistance level, and vancomycin and linezolid are the primary antibacterial drugs used for these resistant bacteria according to the results of etiologica…	2023
Kindu, M; Moges, F; Ashagrie, D; Tigabu, Z; Gelaw, B	Multidrug-resistant and carbapenemase-producing critical gram-negative bacteria isolated from the intensive care unit environment in Amhara region, Ethiopia	PLOS ONE		SEPSIS	Background Intensive care units are units where healthcare-associated infections (HAIs) are common and antimicrobial resistance rates are increasing. Microbial contamination in hospital environment plays an important role in the development of HAIs. Intervention-based improvements in infection prevention and control at national and facility level are critical for the containment of antimicrobial …	2023
Talukdar, D; Marchetti, R; Pileci, RE	Rapid Environmental Monitoring, Capture, and Destruction Activities of SARS-CoV-2 and Bacterial Pathogens During the COVID-19 Health Emergency	CUREUS JOURNAL OF MEDICAL SCIENCE	bacterial coinfection in covid-19; public health and safety; rt-pcr; air transmission; inhalation exposure; infectious diseases; bioaerosol; sars cov-2; biomonitoring; bioreactor	CONTAMINATION; CORONAVIRUS; AIR	Background: The SARS-CoV-2 pandemic is a health emergency for occupational healthcare workers at COVID-19 hospital wards in Italy. The objective of the study was to investigate the bioreactor's effectivity in monitoring and improving air quality via detection, capture, and destruction of the SARS-CoV-2 virus and bacterial pathogens, reducing the risk of transmission among healthcare workers.Metho…	2023
Ortiz-Díez, G; Mengíbar, RL; Turrientes, MC; Artigao, MRB; Gallifa, RL; Tello, AM; Pérez, CF; Santiago, TA	Prevalence, incidence and risk factors for acquisition and colonization of extended-spectrum beta-lactamase- and carbapenemase-producing Enterobacteriaceae from dogs attended at a veterinary hospital in Spain	COMPARATIVE IMMUNOLOGY MICROBIOLOGY AND INFECTIOUS DISEASES	Beta-lactamase; Carbapenemase; Enterobacteriaceae; Dogs; Veterinary hospital; Risk factors	RESISTANT ESCHERICHIA-COLI; KLEBSIELLA-PNEUMONIAE; COMPANION ANIMALS; CTX-M; PUBLIC-HEALTH; GENES; EMERGENCE; PETS; SUSCEPTIBILITY; INFECTIONS	The last 10 years have seen a progressive increase in antibiotic resistance rates in bacteria isolated from companion animals. Exposure of individuals to resistant bacteria from companion animals, such as extendedspectrum beta-lactamase- (ESBL) and carbapenemase- (CPE) producing Enterobacteriaceae, can be propitiated. Few studies evaluate the incidence and risk factors associated with colonizatio…	2023
Camelena, F; de Ponfilly, GP; Pailhories, H; Bonzon, L; Alanio, A; Poncin, T; Lafaurie, M; Depret, F; Cambau, E; Godreuil, S; Chenouard, R; Le Monnier, A; Jacquier, H; Bercot, B	Multicenter Evaluation of the FilmArray Blood Culture Identification 2 Panel for Pathogen Detection in Bloodstream Infections	MICROBIOLOGY SPECTRUM	BCID2; BSI; Biofire; bloodstream infection; FilmArray; molecular diagnosis; rapid diagnosis; genotypic identification; resistance gene; sepsis	RAPID IDENTIFICATION; PERFORMANCE; IMPACT; SYSTEM	The FilmArray Blood Culture Identification 2 panel (BCID2; bioMerieux) is a fully automated PCR-based assay for identifying bacteria, fungi, and bacterial resistance markers in positive blood cultures (BC) in about 1 h. In this multicenter study, we evaluated the performance of the BCID2 panel for pathogen detection in positive BC. Conventional culture and BCID2 were performed in parallel at four…	2023
Alajmi, RZ; Alfouzan, WA; Mustafa, A	The Prevalence of Multidrug-Resistant Enterobacteriaceae among Neonates in Kuwait	DIAGNOSTICS	Enterobacteriaceae; drug resistance; resistance genes; neonates; PCR	MULTIPLEX PCR METHODS; TIGECYCLINE RESISTANCE; ANTIBIOTIC-RESISTANCE; MECHANISMS; CHALLENGES; INFECTIONS; GENES	Increasing numbers of neonates with serious bacterial infections, due to resistant bacteria, are associated with considerable morbidity and mortality rates. The aim of this study was to evaluate the prevalence of drug-resistant Enterobacteriaceae in the neonatal population and their mothers in Farwaniya Hospital in Kuwait and to determine the basis of resistance. Rectal screening swabs were taken…	2023
Obeidat, H; El-nasser, Z; Amarin, Z; Qablan, A; Gharaibeh, F	The impact of COVID-19 pandemic on healthcare associated infections: A teaching hospital experience	MEDICINE	co-infection; COVID-19; drug resistance rates; intensive care units; secondary infections	BACTERIAL COINFECTION; INFLUENZA; COHORT	Coronavirus disease-19 (COVID-19) is a global pandemic, with a high capability of contagious distribution, where national secondary and co-infections characterization are lacking. The objective of this study was to assess the impact of the COVID-19 pandemic on infection rates among patients admitted to the intensive care units at King Abdullah University Hospital, profiling the drug resistance ra…	2023
Yang, XW; Guo, RS; Zhang, B; Xie, BL; Zhou, S; Zhang, B; Lai, Q	Retrospective analysis of drug resistance characteristics and infection related risk factors of multidrug-resistant organisms (MDROs) isolated from the orthopedics department of a tertiary hospital	SCIENTIFIC REPORTS		URINARY-TRACT-INFECTIONS; ACINETOBACTER-BAUMANNII; ACQUIRED PNEUMONIA; ESCHERICHIA-COLI; PREVALENCE; BACTERIA; SUSCEPTIBILITY; VANCOMYCIN; INPATIENTS; IMPACT	Patients infected with multidrug-resistant organisms (MDROs) are known to exhibit longer hospital stays and a significantly poorer prognosis. We performed a 6-year retrospective analysis of nosocomial infections reported in the orthopedics department of our institution, to gain valuable insights into antibiotic sensitivity and infectious characteristics of MDROs, in order to deduce effective meas…	2023
Kato, H; Shoji, K; Jinguji, M; Nishimura, N; Nakagawa, S; Miyairi, I	The Utility of Performing Anaerobic Blood Cultures in Pediatric Intensive Care Units	JOURNAL OF THE PEDIATRIC INFECTIOUS DISEASES SOCIETY	anaerobes; blood culture; blood volume; PICU	BACTEREMIA; DIAGNOSIS; CHILDREN; VOLUME; RECOVERY	Background Several reports have suggested that routine use of anaerobic blood culture bottles together with aerobic bottles may improve blood culture positivity. However, the information is still limited regarding the utility of anaerobic blood culture bottles in the pediatric intensive care unit (PICU), where bacteremia due to anaerobic bacteria is relatively rare. Methods A retrospective observ…	2023
Thom, KA; Rock, C; Robinson, GL; Reisinger, HS; Baloh, J; Li, SS; Diekema, DJ; Herwaldt, LA; Johnson, JK; Harris, AD; Perencevich, EN	Direct Gloving vs Hand Hygiene Before Donning Gloves in Adherence to Hospital Infection Control Practices A Cluster Randomized Clinical Trial	JAMA NETWORK OPEN		HEALTH	Importance Current guidelines require hand hygiene before donning nonsterile gloves, but evidence to support this requirement is lacking.Objective To evaluate the effectiveness of a direct-gloving policy on adherence to infection prevention practices in a hospital setting.Design, Setting, and Participants This mixed-method, multicenter, cluster randomized clinical trial was conducted at 4 academi…	2023
Savova, D; Niyazi, D; Bozhkova, M; Stoeva, T	Molecular epidemiology of carbapenem-resistant Enterobacteriaceae isolated from patients in COVID-19 wards and ICUs in a Bulgarian University Hospital	ACTA MICROBIOLOGICA ET IMMUNOLOGICA HUNGARICA	COVID-19 wards; carbapenem-resistant Enterobacteriaceae; intrahospital dissemination	KLEBSIELLA-PNEUMONIAE; OUTBREAK	Many studies report an increase in antimicrobial resistance of Gram - negative bacteria during the COVID-19 pandemic. Our aim was to evaluate the epidemiological relationship between carbapenemresistant (CR) Enterobacteriaceae isolates from patients in COVID-19 wards and to investigate the main mechanisms of carbapenem resistance in these isolates during the period April 2020-July 2021. A total o…	2023
König, P; Wilhelm, A; Schaudinn, C; Poehlein, A; Daniel, R; Widera, M; Averhoff, B; Müller, V	The VBNC state: a fundamental survival strategy of Acinetobacter baumannii	MBIO	pathogen; virulence; persistence; desiccation	VIBRIO-CHOLERAE; NONCULTURABLE STATE; ESCHERICHIA-COLI; RESUSCITATION; VIRULENCE; EPIDEMIOLOGY; EXPRESSION; CELLS	The viable but non-culturable (VBNC) state is a persistence strategy adopted by bacteria to withstand long-lasting periods of unfavorable conditions. VBNC cells evade classical detection methods and are therefore easily transmitted in the hospital causing relapsing infections. The opportunistic human pathogen Acinetobacter baumannii has become a major threat in health care institutions and the fo…	2023
Loyola-Cruz, MA; Durán-Manuel, EM; Cruz-Cruz, C; Márquez-Valdelamar, LM; Bravata-Alcánra, JC; Cortés-Ortíz, IA; Cureno-Díaz, MA; Ibánez-Cervantes, G; Fernández-Sánchez, V; Castro-Escarpulli, G; Bello-López, JM	ESKAPE bacteria characterization reveals the presence of Acinetobacter baumannii and Pseudomonas aeruginosa outbreaks in COVID-19/VAP patients	AMERICAN JOURNAL OF INFECTION CONTROL	Bacteria ESKAPE; Ventilator associated pneumonia; COVID-19; Clonal dispersion; ERIC-PCR	CARE; COLONIZATION; TRANSMISSION; SURVEILLANCE; INFECTIONS; IMPACT	Introduction: A decrease of detection of outbreaks by multidrug-resistant bacteria in critical areas has been reduced due to COVID-19 pandemic. Therefore, molecular epidemiological surveillance should be a primary tool to reveal associations not evident by classical epidemiology. The aim of this work was to demonstrate the presence of hidden outbreaks in the first wave of the COVID-19 pandemic an…	2023
Yao, ZY; Liu, Y; Zhan, LY; Qiu, T; Li, G; Chen, ZB; Fang, XY; Liu, Z; Wu, W; Liao, ZM; Xia, WF	The utilization of nanopore targeted sequencing proves to be advantageous in the identification of infections present in deceased donors	FRONTIERS IN MICROBIOLOGY	Chinese donation after citizen's death; deceased donors; nanopore targeted sequencing; blood culture; third-generation sequencing	ORGAN DONATION; TRANSPLANTATION; SYSTEM	Background: Nanopore Target Sequencing (NTS) represents a novel iteration of gene sequencing technology; however, its potential utility in the detection of infection in deceased donors has yet to be documented. The present study endeavors to assess the applicability of NTS in this domain.Methods: This retrospective study comprised a cohort of 71 patients who were under intensive care at Renmin Ho…	2023
Patil, PS; Shah, H; Singh, BN; Chandi, DH; Deb, M; Jha, R	Molecular Detection of Carbapenem Resistance in Clinical Isolates of Klebsiella pneumoniae in Tertiary Care Hospital	JOURNAL OF PURE AND APPLIED MICROBIOLOGY	Double Disk Synergy Test (DDST); Modified Hodge Test (MHT); Metallo-beta-Lactames (MBL); Polymerase Chain Reaction	MODIFIED HODGE TEST; ENTEROBACTERIACEAE; TESTS	Antibiotic resistance has become a serious global threat, mainly due to misuse, overuse of antibiotics and non-compliance with infection control protocol. Superbugs are multidrug-resistant (MDR) and extended drug-resistant (XDR) bacteria, mainly Klebsiella pneumoniae and Escherichia coli from the Enterobacteriaceae family, which cause opportunistic infections and raise death rates and hospital ex…	2023
Khana, TQ; Anwar, KA	Detection of Inflammatory Biomarkers Among Patients with Sepsis of Gram-Negative Bacteria: A Cross-Sectional Study	INTERNATIONAL JOURNAL OF GENERAL MEDICINE	beta-Lactamase; double-disc synergy test; SOFA score; sepsis biomarkers; Gram-negative bacteria		Background: Sepsis is a highly mixed ailment that affects patients with numerous conditions of infectious sources and can lead to multi-organ failure with dysregulated host immune response. Objective: To determine inflammatory biomarkers in patients with sepsis caused by Gram-negative bacteria and compare their role in the early detection of sepsis. Methods: This cross-sectional study was conduct…	2023
Zhao, X; Bai, LP; Li, BY; Yue, ZZ; Zhao, YC; Zhao, XY	Comparison of mNGS and conventional culture in non-organ transplant critically ill patients supported by ECMO: a single-center study	FRONTIERS IN CELLULAR AND INFECTION MICROBIOLOGY	metagenomic next-generation sequencing; conventional culture; extracorporeal membrane oxygenation; non-organ transplant; different therapy periods	NOSOCOMIAL INFECTIONS	ObjectivesInfection is one of the important causes of death in intensive care unit (ICU) patients. At present, there are few articles focused on the detailed analysis of pathogenic microorganisms detected in different therapy periods of critically ill patients supported by extracorporeal membrane oxygenation (ECMO). MethodsFrom October 2020 to October 2022, ECMO-assisted patients who underwent mu…	2023
Ahmadian, L; Haghshenas, MR; Mirzaei, B; Khalili, Y; Goli, HR	Role of MexAB-OprM efflux pump in the emergence of multidrug-resistant clinical isolates of Pseudomonas aeruginosa in Mazandaran province of Iran	MOLECULAR BIOLOGY REPORTS	Pseudomonas aeruginosa; MexAB-OprM; Multi-drug resistant (MDR); Efflux pump; Phenylalanine arginine beta-naphthylamide	CLASS 1 INTEGRONS; MOLECULAR CHARACTERIZATION; GENE-EXPRESSION; PREVALENCE; 1-(1-NAPHTHYLMETHYL)-PIPERAZINE; SYSTEM	BackgroundMultidrug-resistant clinical isolates can cause many therapeutic problems. The MexAB-OprM efflux pump plays a significant role in expelling toxins and drugs from the bacterial cells resulting in multidrug-resistant Pseudomonas aeruginosa isolates.PurposeThis study aimed to investigate the effect of the MexAB-OprM efflux pump in the emergence of multidrug-resistant clinical isolates of P…	2023
Bannister-Tyrrell, M; Hillman, A; Indriani, C; Ahmad, RA; Utarini, A; Simmons, CP; Anders, KL; Sergeant, E	Utility of surveillance data for planning for dengue elimination in Yogyakarta, Indonesia: a scenario-tree modelling approach	BMJ GLOBAL HEALTH	Dengue; Mathematical modelling	DEMONSTRATING FREEDOM; WOLBACHIA	IntroductionField trials and modelling studies suggest that elimination of dengue transmission may be possible through widespread release of Aedes aegypti mosquitoes infected with the insect bacterium Wolbachia pipientis (wMel strain), in conjunction with routine dengue control activities. This study aimed to develop a modelling framework to guide planning for the potential elimination of locally…	2023
Platt, AP; Bradley, BT; Nasir, N; Stein, SR; Ramelli, SC; Ramos-Benitez, MJ; Dickey, JM; Purcell, M; Singireddy, S; Hays, N; Wu, J; Raja, K; Curto, R; Salipante, SJ; Chisholm, C; Carnes, S; Marshall, DA; Cookson, BT; Vannella, KM; Madathil, RJ; Soherwardi, S; McCurdy, MT; Saharia, KK; Rabin, J; Grazioli, A; Kleiner, DE; Hewitt, SM; Lieberman, JA; Chertow, D	Pulmonary Co-Infections Detected Premortem Underestimate Postmortem Findings in a COVID-19 Autopsy Case Series	PATHOGENS	COVID-19; pneumonia; co-infection; invasive fungal infections; autopsy; nosocomial infections	CRITICALLY-ILL PATIENTS; BACTERIAL PNEUMONIA; PANDEMIC INFLUENZA; FATAL COVID-19; ASPERGILLOSIS	Bacterial and fungal co-infections are reported complications of coronavirus disease 2019 (COVID-19) in critically ill patients but may go unrecognized premortem due to diagnostic limitations. We compared the premortem with the postmortem detection of pulmonary co-infections in 55 fatal COVID-19 cases from March 2020 to March 2021. The concordance in the premortem versus the postmortem diagnoses …	2023
Orman, A; Celik, Y; Evik, G; Ersoz, G; Kuyucu, N; Ozmen, BO	Should Perirectal Swab Culture Be Performed in Cases Admitted to the Neonatal Intensive Care Unit? Lessons Learned from the Neonatal Intensive Care Unit	CHILDREN-BASEL	perirectal swab; carbapenem; resistance; enterobacterales; vancomycin; enterococci; neonatal unit	VANCOMYCIN-RESISTANT ENTEROCOCCI; GRAM-NEGATIVE BACILLI; SPECTRUM BETA-LACTAMASE; CARBAPENEMASE-PRODUCING ENTEROBACTERIACEAE; BLOOD-STREAM INFECTIONS; COLONIZATION; EPIDEMIOLOGY; PREVENTION; SEPSIS	Serial perirectal swabs are used to identify colonization of multidrug-resistant bacteria and prevent spread. The purpose of this study was to determine colonization with carbapenem-resistant Enterobacterales (CRE) and vancomycin-resistant Enterococci (VRE). An additional purpose was to establish whether sepsis and epidemic associated with these factors were present in the neonatal intensive care…	2023
Cennamo, V; Landi, S; Aragona, G; Colecchia, A; Conigliaro, R; Di Lorenzo, D; Di Marco, M; Fabbri, C; Falcone, P; Gaiani, F; Manno, M; Merighi, A; Mussetto, A; Peghetti, A; Sassateli, R; Solfrini, V; Zagari, RM; Arena, R; Bertani, H; Binda, C; Boarino, V; De Padova, A; Feletti, V; Fuccio, L; Iori, V; Nervi, G; Prati, GM; Soriani, P; De Palma, R	The management of endoscopic retrograde cholangio-pancreatography-related infections risk: results of an italian survey at regional level	ANNALI DI IGIENE MEDICINA PREVENTIVA E DI COMUNITA	ERCP; duodenoscope associate infections; infection risk; infection prevention Parole chiave; infezioni associate al duodenoscopio; rischio infettivo; prevenzione delle infezioni	CARBAPENEM-RESISTANT ENTEROBACTERIACEAE; TRANSMISSION; ERCP	Background and aim. Among the Endoscopic retrograde cholangiopancreatography (ERCP) adverse events, an increasingly arising problem is the transmission of Multi Drug Resistant (MDR) Bacteria through duodenoscopes. The aim of this survey was to evaluate the current clinical practice of management of ERCP associated infections in Emilia-Romagna, Italy.Methods. An online survey was developed includi…	2023
Zapata-Farfan, J; Kafshgari, MH; Patskovsky, S; Meunier, M	Dynamic multispectral detection of bacteria with nanoplasmonic markers	NANOSCALE		LIGHT-SCATTERING; NANOPARTICLES; MICROSCOPY; PATHOGENS	Culture-based diagnosis of bacterial diseases is a time-consuming technique that can lead not only to antibiotic resistance or bacterial mutation but also to fast-spreading diseases. Such mutations contribute to the fast deterioration of the patient's health and in some cases the death depending on the complexity of the infection. There is great interest in developing widely available molecular-l…	2023
Seshatri, S; Charan, J; Tak, V; Nag, VL; Varthya, SB; Ambwani, S	Frequency of OXA-Type Carbapenemases among Carbapenem-Resistant Acinetobacter baumannii in Clinical Isolates from Adult Intensive Care Unit in India	JOURNAL OF LABORATORY PHYSICIANS	Acinetobacter; antimicrobial resistance; carbapenemases; OXA enzymes	MOLECULAR CHARACTERIZATION; ANTIBIOTIC-RESISTANCE; GENES; EPIDEMIOLOGY; SPREAD; SOUTH; SPP.	Purpose Acinetobacter baumannii is a highly virulent bacteria in modern health care, with a high ability to acquire antimicrobial resistance. Carbapenemases production appears to be the most common mechanism involved in drug resistance to carbapenem. As the prevalence of carbapenem-resistant A. baumannii was high in intensive care unit (ICU) patients, this study was designed to find the frequency…	2023
Ferreira, ICD; Menezes, RD; de Jesus, TA; Machado, ICD; Lopes, MSM; Costa, AD; de Araújo, LB; Röder, DVD	Impact of intestinal colonization by Gram-negative bacteria on the incidence of bloodstream infections and lethality in critically ill neonates	JOURNAL OF INFECTION AND PUBLIC HEALTH	Antimicrobial Drug Resistance; Colonization; Gram-Negative Bacteria; Healthcare-Associated Infections; Infection Control		Background: Early detection of antimicrobial-resistant microorganisms is crucial to prevent subsequent invasive infections and contain their spread in the Neonatal Intensive Care Unit (NICU). This study aims to investigate the association between intestinal colonization (IC) by Gram-negative bacteria and the risk of bloodstream infection (BSI) in critically ill neonates. Methods: Data from the el…	2023
Bopp, TC; Marchesi, M; Zihlmann, R; Sax, H; Wolfensberger, A	Identifying patients at high risk for multidrug-resistant organisms after hospitalization abroad	INFECTION CONTROL AND HOSPITAL EPIDEMIOLOGY		LINE PROBE ASSAY; CARBAPENEMASE GENES; FOREIGN HOSPITALS; RAPID DETECTION; BACTERIA; COLONIZATION; TIME; ENTEROBACTERIACEAE; IDENTIFICATION; SITES	Objectives:We quantified the percentage of multidrug-resistant organism (MDRO) carriers among repatriated patients. We identified factors associated with MDRO carriage, and we evaluated the yield of MDRO detection per screened body site. Design:Retrospective cohort study. Setting:A tertiary-care center in Switzerland. Patients:Adult patients after a stay in a healthcare institution abroad. Method…	2023
Bourdin, T; Benoit, MÉ; Monnier, A; Bédard, E; Prévost, M; Charron, D; Audy, N; Gravel, S; Sicard, M; Quach, C; Déziel, E; Constant, P	Serratia marcescens Colonization in a Neonatal Intensive Care Unit Has Multiple Sources, with Sink Drains as a Major Reservoir	APPLIED AND ENVIRONMENTAL MICROBIOLOGY	health care-associated infections; nosocomial infections; NICU; opportunistic pathogen; outbreak; molecular typing; P trap; HiSST	PSEUDOMONAS-AERUGINOSA; MOLECULAR EPIDEMIOLOGY; HOSPITAL HYGIENE; OUTBREAK; INFECTION; COST	Compelling evidence suggests a contribution of the sink environment to the transmission of opportunistic pathogens from the hospital environment to patients in neonatal intensive care units (NICU). In this study, the distribution of the opportunistic pathogen Serratia marcescens in the sink environment and newborns in a NICU was investigated. More than 500 sink drain and faucet samples were colle…	2023
Sereshkeh, SA; Ahrabi, SS; Khosroabadi, A; Ghanaiee, RM; Karimi, A; Alebouyeh, M	Primary Carrier Status and Alteration in the Colonization of the Extended-Spectrum β-Lactamase Producing Enterobacteriaceae Among Children in Pediatric Intensive Care Unit During the Hospital Stay	ARCHIVES OF PEDIATRIC INFECTIOUS DISEASES	Enterobacteriaceae; Extended-Spectrum Beta-Lactamase; Pediatric Intensive Care Unit; ERIC-PCR	KLEBSIELLA-PNEUMONIAE; ESCHERICHIA-COLI; RESISTANT ENTEROBACTERIACEAE; RISK-FACTORS; TRANSMISSION	Background: Widespread and inappropriate use of antibiotics has led to an increase in antibiotic-resistant bacteria worldwide. Extended-spectrum beta-lactamases (ESBLs) are among the most important resistance mechanisms in members of Enterobacteriaceae, which can pose a threat to patients. Objectives: This study aimed to investigate the carrier status and alteration in the fecal transmission of E…	2023
Moore, JH; Salahi, A; Honrado, C; Warburton, C; Tate, S; Warren, CA; Swami, NS	Correlating Antibiotic-Induced Dysbiosis to Clostridioides difficile Spore Germination and Host Susceptibility to Infection Using an Ex Vivo Assay	ACS INFECTIOUS DISEASES	Microbiota; Bacteria; Microfluidics; Cytometry; Antibiotics	INTESTINAL MICROBIOTA; IMPEDANCE CYTOMETRY; RHO-PROTEINS; MOUSE MODEL; HEALTH; ASSOCIATION; RECURRENCE; BURDEN	Antibiotic-induced microbiota disruption and its persistence create conditions for dysbiosis and colonization by opportunistic pathogens, such as those causing Clostridioides difficile (C. difficile) infection (CDI), which is the most severe hospital-acquired intestinal infection. Given the wide differences in microbiota across hosts and in their recovery after antibiotic treatments, there is a n…	2023
Carvalho-Brugger, S; Torner, MM; Jiménez, GJ; Badallo, O; Lerma, FA; Trujillano, J; Casals, FXN; Palomar, M	Preventive isolation criteria for multidrug-resistant bacteria detection in patients admitted to the ICU: Multicenter study within the Zero Resistance program	MEDICINA INTENSIVA	Multidrug resistance; Antibiotic resistance; Risk factors; Resistencia Zero		Objective: To verify the validity of a check list of risk factors (RF) proposed by the Spanish Resistencia Zero project (RZ) in the detection of multi-resistant bacteria (MRB), as well as to identify other possible RF for colonization and infection by MRB at intensive care (ICU) admission.Design: A prospective cohort study, conducted in 2016. Setting: Multicenter study, patients who needed admiss…	2023
Allel, K; Stone, J; Undurraga, EA; Day, L; Moore, CE; Lin, L; Furuya-Kanamori, L; Yakob, L	The impact of inpatient bloodstream infections caused by antibiotic-resistant bacteria in low- and middle-income countries: A systematic review and meta-analysis	PLOS MEDICINE		STAPHYLOCOCCUS-AUREUS BACTEREMIA; LENGTH-OF-STAY; SUSCEPTIBLE PSEUDOMONAS-AERUGINOSA; ENTEROCOCCUS-FAECALIS BACTEREMIA; HOSPITALIZED CANCER-PATIENTS; GRAM-NEGATIVE BACTEREMIA; RISK-FACTORS; CARBAPENEM-RESISTANT; INTENSIVE-CARE; ACINETOBACTER-BAUMANNII	BackgroundBloodstream infections (BSIs) produced by antibiotic-resistant bacteria (ARB) cause a substantial disease burden worldwide. However, most estimates come from high-income settings and thus are not globally representative. This study quantifies the excess mortality, length of hospital stay (LOS), intensive care unit (ICU) admission, and economic costs associated with ARB BSIs, compared to…	2023
Edderdouri, K; Kabbaj, H; Laamara, L; Lahmouddi, N; Lamdarsi, O; Zouaki, A; El Amin, G; Zirar, J; Seffar, M	Contribution of the FilmArray BioFire® Technology in the Diagnosis of Viral Respiratory Infections during the COVID-19 Pandemic at Ibn Sina University Hospital Center in Rabat: Epidemiological Study about 503 Cases	ADVANCES IN VIROLOGY		SYNCYTIAL VIRUS; CHILDREN; INFLUENZA; SEASONALITY; FREQUENCY; IMPACT; TRACT	Respiratory viruses are the most involved pathogens in acute respiratory infections. During the COVID-19 pandemic, new elements have been brought to this topic, especially at the diagnostic and therapeutic level. The objective of this work is to describe the epidemiology of respiratory viruses in patients admitted to the Ibn Sina University Hospital of Rabat during a period characterized by the e…	2023
Thakur, CK; Vinayaraj, EV; Sagar, T; Das, BK; Kabra, SK; Wig, N; Chaudhry, R	Serological profile of patients suspected with non-scrub typhus rickettsioses	INDIAN JOURNAL OF MEDICAL MICROBIOLOGY	Acute febrile illness; Rickettsioses; Serology; Spotted fever group rickettsia; Typhus group rickettsia	SPOTTED-FEVER GROUP; SEVERE MURINE TYPHUS; DISEASES; INFECTIONS; INDIA; DIAGNOSIS; SEROPREVALENCE; MANAGEMENT; SYSTEM	Background: Rickettsial pathogens are Gram-negative, obligate intracellular bacteria. They are transmitted by arthropods and are responsible for a wide variety of disease, from minor to life-threatening, which have a global effect on human health. Limited data are available on the prevalence of rickettsial diseases from India, and the disease epidemiology is not fully described. This study aimed …	2023
Sethi, K; Verma, RK; Yadav, RK; Singh, DP; Singh, S	A study on bacteriological profile in suspected cases of neonatal sepsis and its correlation with various biomarkers in the rural population of a university hospital	JOURNAL OF FAMILY MEDICINE AND PRIMARY CARE	Acute phase reactants; ELISA; hs-CRP; neonatal sepsis; procalcitonin	C-REACTIVE PROTEIN; PROCALCITONIN; DIAGNOSIS; INFLAMMATION; MARKERS	Introduction: Neonatal sepsis is an infection in newborns that may be caused by bacteria, fungi, or viruses and has a high death and morbidity rate. The clinical presentation of sepsis may be rather general, making it challenging to make a diagnosis. While blood culture is the most accurate method to diagnose sepsis, it is also time-consuming. Because of this, it is crucial to locate other biomar…	2023
Bai, Y; Guo, YQ; Chen, X; Yang, CX; Gu, L	Isolation of Epstein-Barr virus-deoxyribonucleic acid in the lower respiratory tract for distinguishing critically ill patients from those with influenza-associated pneumonia: A pilot study	CLINICAL RESPIRATORY JOURNAL	ARDS; Epstein-Barr virus; influenza; pneumonia	BRONCHOALVEOLAR LAVAGE; CYTOMEGALOVIRUS; COINFECTION	BackgroundWhen influenza A-related pneumonia is complicated by bacteria, aspergillus, and other infections, the disease is aggravated, while there is no research on the role of Epstein-Barr virus (EBV) on patients with influenza A-related pneumonia. This study aimed to evaluate the relationship between the isolation of EBV and influenza A-related pneumonia.MethodsThis is a clinical study based on…	2023
Colom, MF; Ferrer, C; Ekai, JL; Ferrández, D; Ramírez, L; Gómez-Sánchez, N; Leting, S; Hernández, C	First report on mycetoma in Turkana County-North-western Kenya	PLOS NEGLECTED TROPICAL DISEASES			Author summaryIn this paper we describe the medical situation of people affected by mycetoma in Turkana County, (north-west Kenya). This is a neglected disease, suffered by the poorest people in the world due to lack of education and access to health services. In Turkana there is a high incidence of this disease, especially among young men working in the fields, where they get infected by fungi o…	2023
Zornic, S; Lukovic, B; Petrovic, I; Jencic, A	Prevalence of multidrug-resistant Gram-negative bacteria from blood cultures and rapid detection of beta-lactamase-encoding genes by multiplex PCR assay	GERMS	Blood culture; Gram-negative bacteria; multidrug-resistant; beta-lactamases; carbapenemases	STREAM INFECTIONS; KLEBSIELLA-PNEUMONIAE; ENTEROBACTERIACEAE	Introduction This study aimed to determine the prevalence of multidrug-resistant Gram-negative bacteria (GNB) from blood cultures in a tertiary-care hospital and the multiplex PCR assay's ability to detect resistance genes. Methods A total of 388 GNB isolates obtained from hospitalized patients between November 2019 and November 2021 were included in the study. Antimicrobial susceptibility testin…	2022
Huang, CP; Tsai, CS; Su, PL; Huang, TH; Ko, WC; Lee, NY	Respiratory etiological surveillance among quarantined patients with suspected lower respiratory tract infection at a medical center in southern Taiwan during COVID-19 pandemic	JOURNAL OF MICROBIOLOGY IMMUNOLOGY AND INFECTION	COVID-19; Microbial etiology; Respiratory virus; Multiplex PCR	COMMUNITY-ACQUIRED PNEUMONIA; ADULT PATIENTS; EPIDEMIOLOGY; BACTERIAL; DISEASE	Background: A comprehensive study of respiratory pathogens was conducted in an area with a low prevalence of COVID-19 among the adults quarantined at a tertiary hospital.Methods: From March to May 2020, 201 patients suspected lower respiratory tract infection (LRTI) were surveyed for etiologies by multiplex polymerase chain reaction (PCR: FilmArray TM Respiratory Panel) test combination with cult…	2022
Sámal, V; Paldus, V; Fácková, D; Mecl, J	Multidrug-resistant bacteria in urine culture among patients with spinal cord injury and disorder: Time to first detection and analysis of risk factors	SPINAL CORD		CLEAN INTERMITTENT CATHETERIZATION; GRAM-NEGATIVE ORGANISMS; TRACT-INFECTION; PREVALENCE; EPIDEMIOLOGY; VETERANS	Study design Retrospective cohort study. Objectives The aim of this study was to assess the time to first detection of multidrug-resistant bacteria (MDRB) in urine culture and identify risk factors associated with the first detection of MDRB (1(st) MDRB). Setting Spinal Care Ward and Department of Microbiology, Regional Hospital Liberec a.s., Liberec, Czech Republic. Method We cultured urine samp…	2022
Priante, E; Minotti, C; Contessa, C; Boschetto, M; Stano, P; Dal Bello, F; De Canale, E; Lolli, E; Baldo, V; Baraldi, E; Dona, D	Successful Control of an Outbreak by Phenotypically Identified Extended-Spectrum Beta-Lactamase-Producing Klebsiella pneumoniae in a Neonatal Intensive Care Unit	ANTIBIOTICS-BASEL	outbreak; newborn; extended-spectrum beta-lactamase-producing Klebsiella pneumoniae; neonatal intensive care unit; multidrug-resistant organism	GRAM-NEGATIVE INFECTIONS; COLONIZATION; MANAGEMENT	Background: Premature newborns represent a vulnerable population, at high risk of acquiring nosocomial infections during neonatal intensive care unit (NICU) admission. Multidrug-resistant organisms represent the greatest concern due to their intrinsic virulence and the limited therapeutic options. Resistant Enterobacterales are a growing threat for critically ill neonates, with increasing numbers…	2022
Verdugo-Paiva, F; Otaiza, F; Roson-Rodríguez, P; Rojas-Gomez, AM; Galas, M; El Omeiri, N; Fuentes, Y; Rada, G; Ramón-Pardo, P	Effects of screening strategies to detect carbapenem-resistant gram-negative bacteria: A systematic review	AMERICAN JOURNAL OF INFECTION CONTROL	Carbapenem resistance; Enterobacteriaceae; Acinetobacter; Pseudomonas; Surveillance; Systematic review	KLEBSIELLA-PNEUMONIAE; PSEUDOMONAS-AERUGINOSA; FINDINGS TABLES; ENTEROBACTERIACEAE; INFECTION; OUTBREAK; IMPACT; INTERVENTION; PROGRAM	Objective: This systematic review aims to summarize the evidence on the effects of screening strategies to detect carbapenem-resistant gram-negative bacteria (Enterobacteriaceae, Acinetobacter baumannii, and Pseudomonas aeruginosa).Methods: Eligible studies were randomized trials, non-randomized controlled trials, controlled before-after studies, and interrupted time series. We conducted searches…	2022
Tamsi, NSF; Latif, MT; Othman, M; Abu Bakar, FD; Yusof, HM; Noraini, NMR; Zahaba, M; Sahani, M	Antibiotic resistance of airborne bacterial populations in a hospital environment	ENVIRONMENTAL MONITORING AND ASSESSMENT	Indoor air quality; Antibiotic resistant bacteria; Hospital-acquired infection; Potential pathogens	MICROBIAL COMMUNITIES; INDOOR; FUNGI; AIR	Bacteria in a hospital environment potentially cause hospital-acquired infections (HAIs), particularly in immunocompromised individuals. Treatments of HAIs with antibiotics, however, are ineffective due to the emergence of antibiotic-resistant bacteria (ARB). This study aims to identify airborne bacteria in a tertiary hospital in Malaysia and screen for their resistance to commonly used broad-spe…	2022
Ravikant; Kumari, P; Kumar, M; Roy, P; Jeya, M	Detection of Carbapenem-resistant Enterobacteriaceae by Real-Time PCR and Assessment of Hospitalization Related Risk Factors Associated with their Fecal Carriage: A Case-control Study	JOURNAL OF PURE AND APPLIED MICROBIOLOGY	Gut colonization; CRE; Fecal Carriage; NDM-1; RT-PCR	RAPID DETECTION; GENES	Opportunistic behavior of commensal bacteria during severe infection, especially of the intestine is always considered as a predisposing threat for the severely ill patient admitted to hospitals. A descriptive-analytical case-control study was carried out to detect the prevalence and risk factor analysis of fecal carriage of Ca rba penem-resista nt Enterobacteriaceae. Patients having fecal carria…	2022
Samota, S; Rani, R; Chakraverty, S; Kaushik, A	Biosensors for simplistic detection of pathogenic bacteria: A review with special focus on field-effect transistors	MATERIALS SCIENCE IN SEMICONDUCTOR PROCESSING	Biosensor; Transducer; Field effect transistor; Bacterial pathogen; Nanomaterials	LABEL-FREE DETECTION; ESCHERICHIA-COLI O157; FOOD-BORNE PATHOGENS; PAPER-BASED ELISA; RAPID DETECTION; LISTERIA-MONOCYTOGENES; STAPHYLOCOCCUS-AUREUS; SENSITIVE DETECTION; REAL-TIME; SALMONELLA-TYPHIMURIUM	Among various infectious agents, pathogenic bacteria pose severe threat to human health and worldwide economy as it is difficult to treat several serious bacterial infections. Serious outbreaks of bacterial infections are not only limited to hospitals but are prevalent in food, water, soil and air. Conventional techniques like biochemical assays for bacterial identification are not efficient beca…	2022
Tomassini, L; Costamagna, SR; Randazzo, V	Isolation of Acanthamoeba spp. in closed rooms of a hos- pital in Buenos Aires province, Argentina	ACTA BIOQUIMICA CLINICA LATINOAMERICANA	Free-living amoebas; Protozoa; Reservoir; Hospital environment; Resistance to disinfectants	STAPHYLOCOCCUS-AUREUS MRSA	Free-living amoebae (FLA) are ubiquitous protozoa with four pathogenic genera for humans: Acanthamoeba, Naegleria, Balamuthia, and Sappinia. Acanthamoeba can act as a reservoir of microorganisms (endosymbionts), for which reason, in a hospital environment, it would imply a risk for transmission of nosocomial bacteria, viruses and fungi. The presence of AVL, with emphasis on Acanthamoeba spp., was…	2022
Teng, ASJ; Habermehl, PE; van Houdt, R; de Jong, MD; van Mansfeld, R; Matamoros, SPF; Spijkerman, IJB; van Meer, MPA; Visser, CE	Comparison of fast Fourier transform infrared spectroscopy biotyping with whole genome sequencing-based genotyping in common nosocomial pathogens	ANALYTICAL AND BIOANALYTICAL CHEMISTRY	Fourier transform infrared spectroscopy; Whole genome sequencing; Bacterial typing; Bacteria	IDENTIFICATION; BACTERIA	Early detection of bacterial transmission and outbreaks in hospitals is important because nosocomial infections can result in health complications and longer hospitalization. Current practice to detect outbreaks uses genotyping methods amplified fragment length polymorphism (AFLP) and whole genome sequencing (WGS), which are not suitable methods for real-time transmission screening of both suscep…	2022
Dapper, L; Dick, A; Nonnenmacher-Winter, C; Günther, F	Influence of public health and infection control interventions during the severe acute respiratory syndrome coronavirus 2 pandemic on the in-hospital epidemiology of pathogens: in hospital versus community circulating pathogens	ANTIMICROBIAL RESISTANCE AND INFECTION CONTROL		COVID-19	Background: The first detection of severe acute respiratory syndrome coronavirus 2 (SARS-CoV-2) in Germany was reported in early February 2020. In addition, extensive control measures on the coronavirus disease 2019 (COVID-19) pandemic have been placed in Germany since March 2020. These include contact and travel restrictions, distance rules, mandatory wearing of face masks and respirators, cance…	2022
Ruiz-González, A; Sáez-Huerta, E; Martínez-Alonso, M; Bernet-Sánchez, A; Porcel, JM	A Simple Scoring System to Differentiate Bacterial from Viral Infections in Acute Exacerbations of COPD Requiring Hospitalization	INTERNATIONAL JOURNAL OF CHRONIC OBSTRUCTIVE PULMONARY DISEASE	COPD; respiratory infections; C-reactive protein		Objective: Both bacteria and viruses may cause acute exacerbations of chronic obstructive pulmonary disease (AECOPD). The objective of this study was to identify readily available clinical parameters to discriminate between them. Methods: During a winter period all consecutive patients with an AECOP who were hospitalized in a non-ICU general ward were prospectively enrolled. In addition to blood …	2022
Nishida, S; Ihashi, Y; Yoshino, Y; Ono, Y	Evaluation of an immunological assay for the identification of multiple carbapenemase-producing Gram-negative bacteria	PATHOLOGY	Carbapenemase; Gram-negative bacteria; lateral flow immuno-assay; LFIA; point-of-care test; POCT; multidrug resistance; MDR; multiplex PCR; intensive care unit; ICU	RAPID DETECTION; ESCHERICHIA-COLI; BETA-LACTAMASES; GENES; RESISTANCE; PCR; ENTEROBACTERIACEAE; BAUMANNII; DISEASE; SET	Carbapenemase-producing Gram-negative organisms (CPOs) frequently gain multidrug-resistant phenotypes and thereby limit the therapeutic options available. Colonisation and infection with CPOs are critical risks for mortality in clinical settings, especially in critical care medicine. Carbapenemase genes on plasmids have transferred to many Gram-negative species, and these species have spread, lea…	2022
Yun, KW; Wallihan, R; Desai, A; Alter, S; Ambroggio, L; Cohen, DM; El-Assal, O; Marzec, S; Florin, TA; Keaton, M; Shah, SS; Ruddy, RM; Sharpe, S; Leber, AL; Everhart, K; Mejias, A; Ramilo, O	Clinical Characteristics and Etiology of Community-acquired Pneumonia in US Children, 2015-2018	PEDIATRIC INFECTIOUS DISEASE JOURNAL	pneumonia; children; etiology; inpatients; outpatients	REAL-TIME PCR; POLYMERASE-CHAIN-REACTION	Background: Pneumonia has a major impact on childhood health and health care costs. This study was designed to obtain contemporary information on the clinical characteristics and etiology of community-acquired pneumonia (CAP) in children from both inpatient and outpatient settings in the USA. Methods: We conducted a prospective, multicenter, observational study of CAP among previously healthy chi…	2022
Imoto, W; Yamada, K; Kuwabara, G; Shibata, W; Sakurai, N; Nonose, Y; Okada, Y; Nakaie, K; Fujita, A; Kakeya, H	Impact of coronavirus disease 2019 on infectious disease treatment and infection control at a tertiary hospital in Japan	JOURNAL OF INFECTION AND CHEMOTHERAPY	Antimicrobial resistance; COVID-19; Hand sanitizers; Infection control	HAND-HYGIENE; PROGRAM; MRSA	Introduction: Coronavirus disease 2019 (COVID-19) has greatly impacted medical care practices. Although the effects on infectious disease treatment and infection control, such as antimicrobial resistance, have been specified, very few reports exist on the specific effects of COVID-19.Methods: We investigated the effects of COVID-19 on daily medical practices at a tertiary hospital in Japan by com…	2022
Lopez-Hernandez, I; López-Cerero, L; Fernández-Cuenca, F; Pascual, A	The role of the microbiology laboratory in the diagnosis of multidrug-resistant Gram-negative bacilli infections. Importance of the determination of resistance mechanisms	MEDICINA INTENSIVA	Infections; Multidrug-resistant gram-negative bacilli; Microbiology laboratory; Resistance mechanisms	CARBAPENEMASE-PRODUCING ENTEROBACTERIACEAE; INTENSIVE-CARE-UNIT; RAPID DETECTION; ANTIMICROBIAL STEWARDSHIP; CLINICAL MICROBIOLOGY; MALDI-TOF; SYSTEM; FUTURE; TIME; DISC	Early diagnosis and treatment has an important impact on the morbidity and mortality of infections caused by multidrug-resistant bacteria. Multidrug-resistant gram-negative bacilli constitute the main current threat in hospitals and especially in intensive care units. The role of the microbiology laboratory is essential in providing a rapid and effective response. This review updates the microbio…	2022
Suzuki, M; Hayakawa, K; Asai, Y; Matsunaga, N; Terada, M; Ohtsu, H; Toyoda, A; Takasaki, J; Hojo, M; Yanagawa, Y; Saito, S; Yamamoto, K; Ide, S; Akiyama, Y; Suzuki, T; Moriya, A; Mezaki, K; Ohmagari, N	Evaluation of the Detection of Pathogens in Hospitalized Patients with COVID-19 at a Tertiary Hospital in Japan	JAPANESE JOURNAL OF INFECTIOUS DISEASES			The detection of other pathogens in patients with hospitalized coronavirus disease (COVID-19) are not frequent. Considering that data from Japan are limited, we conducted an observational study including patients with hospitalized COVID-19 at the National Center for Global Health and Medicine from January to September 2020. In total, 247 patients with COVID-19 were included in the study. Rapid di…	2022
Mustapha, MM; Srinivasa, VR; Griffith, MP; Cho, ST; Evans, DR; Waggle, K; Ezeonwuka, C; Snyder, DJ; Marsh, JW; Harrison, LH; Cooper, VS; Van Tyne, D	Genomic Diversity of Hospital-Acquired Infections Revealed through Prospective Whole-Genome Sequencing-Based Surveillance	MSYSTEMS	whole-genome sequencing; hospital-acquired infections; pangenome; antimicrobial resistance; horizontal gene transfer; bacterial evolution	ANTIMICROBIAL RESISTANCE; EMERGENCE; PATHOGENS; SOFTWARE; VERSION; CARE; TOOL	Healthcare-associated infections (HAIs) cause mortality, morbidity, and waste of health care resources. HAIs are also an important driver of antimicrobial resistance, which is increasing around the world. Beginning in November 2016, we instituted an initiative to detect outbreaks of HAIs using prospective whole-genome sequencing-based surveillance of bacterial pathogens collected from hospitalize…	2022
Nicola, F; Cejas, D; González-Espinosa, F; Relloso, S; Herrera, F; Bonvehí, P; Smayevsky, J; Figueroa-Espinosa, R; Gutkind, G; Radice, M	Outbreak of Klebsiella pneumoniae ST11 Resistant To Ceftazidime-Avibactam Producing KPC-31 and the Novel Variant KPC-115 during COVID-19 Pandemic in Argentina	MICROBIOLOGY SPECTRUM	KPC carbapenemases; ST11 Klebsiella pneumoniae; cettazidime-avibactam resistance; mutant KPC	BETA-LACTAMASES; ENTEROBACTERIACEAE; INFECTIONS	We describe an outbreak of Klebsiella pneumoniae sequence type 11 (ST11) producing KPC variants resistant to ceftazidime-avibactam. Six patients hospitalized in the intensive care unit (mostly due to critical COVID pneumonia) presented infection or colonization by this bacterium. They had several comorbidities and required mechanical ventilation, central venous catheters, and urinary catheters. A…	2022
Said, KB; Alsolami, A; Khalifa, AM; Khalil, NA; Moursi, S; Rakha, E; Osman, A; Rashidi, M; Taha, TE; Bashir, AI; Moussa, S; Al Jadani, A; Nagi, H; Kuddus, M; Alrashedi, OM; Alharbi, AS; Alfaraj, A; Mustafa, R	Molecular Diagnosis, Antimicrobial Resistance Profiles and Disease Patterns of Gram-Positive Pathogens Recovered from Clinical Infections in Major Ha'il Hospitals	MICROBIOLOGY RESEARCH	Gram-positive nosocomial resistance; MRSA; CA-MRSA; Staphylococcus aureus; resistance surveillance	BLOOD-STREAM INFECTIONS; STAPHYLOCOCCUS-AUREUS; METHICILLIN-RESISTANT; SAUDI-ARABIA; EPIDERMIDIS; ENTEROCOCCI; SUSCEPTIBILITY; EPIDEMIOLOGY; TRENDS; RISK	Nosocomial resistance in staphylococci and enterococci is challenging. The aim of this work was to conduct a multipoint study using molecular detections, antimicrobial resistances profiles, patient demographics and disease patterns for objective assessments of Staphilococcus aureus and other Gram-positive pathogens recovered from clinical infections in the Ha'il region. We have surveyed 188 non-d…	2022
Bhatta, DR; Koirala, S; Baral, A; Amatya, NM; Parajuli, S; Shrestha, R; Hamal, D; Nayak, N; Gokhale, S	Methicillin-Resistant Staphylococcus aureus Contamination of Frequently Touched Objects in Intensive Care Units: Potential Threat of Nosocomial Infections	CANADIAN JOURNAL OF INFECTIOUS DISEASES & MEDICAL MICROBIOLOGY		SURFACES; COLONIZATION; DISINFECTION; RESERVOIRS; PATHOGENS; MRSA	Background. Bacterial contamination in intensive care units is an important risk factor associated with increasing incidences of nosocomial infections. This study was conducted to study the bacterial colonization on commonly touched objects of intensive care units and antibiotic resistance pattern of bacterial isolates. Methods. This study was conducted in different intensive care units of Manipa…	2022
Tsai, MS; Yang, YH; Huang, TY; Tsai, YT; Lu, A; Wu, CY; Hsu, CM; Liu, CY; Lee, CP; Lin, MH; Chang, PJ; Chang, GH	Pathogens and Prognosis of Deep Neck Infection in End-Stage Renal Disease Patients	LARYNGOSCOPE	Bacteriology; cervical abscess; cellulitis; fascial space; head and neck; mortality	RESISTANT STAPHYLOCOCCUS-AUREUS; RISK-FACTORS; DIABETES-MELLITUS; SPACE INFECTIONS; MRSA INFECTIONS; COLONIZATION; DIALYSIS; GUIDELINES; BACTERIAL	Objectives/Hypothesis To examine the pathogenic bacterial spectra and prognosis of deep neck infection (DNI) in end-stage renal disease (ESRD) patients. Study Design Retrospective study. Methods Patients diagnosed with DNI between 2004 and 2015 in Chang Gung Memorial Hospital were enrolled and divided into three groups, namely ESRD-DNI, chronic kidney disease (CKD)-DNI, and non-CKD-DNI. Differenc…	2022
Obenza, A; Cruz, P; Buttner, M; Woodard, D	Microbial contamination on ambulance surfaces: a systematic literature review	JOURNAL OF HOSPITAL INFECTION	Ambulance; Emergency medical service; Contamination; MRSA; Carbapenem-resistant; Enterobacterales (CRE); Klebsiella pneumoniae; carbapenemase (KPC)	CARE-ASSOCIATED INFECTIONS; STAPHYLOCOCCUS-AUREUS; METHICILLIN-RESISTANT; PREVALENCE; VEHICLES	Healthcare-associated infections (HAIs) are infections that patients acquire while receiving medical treatment in a healthcare facility. During ambulatory transport, the patient may be exposed to pathogens transmitted from emergency medical service (EMS) personnel or EMS surfaces.The aim of this study was to determine whether organisms commonly associated with HAIs have been detected on surfaces …	2022
Li, DK; Gai, W; Zhang, JH; Cheng, W; Cui, N; Wang, H	Metagenomic Next-Generation Sequencing for the Microbiological Diagnosis of Abdominal Sepsis Patients	FRONTIERS IN MICROBIOLOGY	intra-abdominal infection; sepsis; abdominal sepsis; mNGS; infection	INTRAABDOMINAL INFECTIONS	ObjectivesFor patients with intra-abdominal infection (IAI), the rapid and accurate identification of pathogens remains a challenge. Metagenomic next-generation sequencing (mNGS) is a novel technique for infectious diseases, but its application in IAI is limited. In this study, we compared the microbiological diagnostic ability of plasma mNGS with that of conventional peritoneal drainage (PD) cul…	2022
Masui, T; Nakano, R; Nakano, A; Saito, K; Suzuki, Y; Kakuta, N; Horiuchi, S; Tsubaki, K; Kitahara, T; Yano, H	Predominance of CTX-M-9 Group Among ESBL-Producing Escherichia coli Isolated from Healthy Individuals in Japan	MICROBIAL DRUG RESISTANCE	extended-spectrum beta-lactamase (ESBL); non-ESBL; Escherichia coli; CTX-M; healthy individual	LACTAMASE-PRODUCING ENTEROBACTERIACEAE; SPECTRUM BETA-LACTAMASES; CTX-M; FECAL CARRIAGE; PREVALENCE; ANIMALS; FOOD; INFECTIONS; EPIDEMIOLOGY; INCREASE	The detection rate of extended-spectrum beta-lactamase (ESBL)-producing Enterobacterales, microorganisms associated with health care settings, has significantly increased worldwide. Moreover, their community incidence has increased in several countries. In this study, we investigated the prevalence and genetic diversity of ESBL-producing Escherichia coli isolated from 547 nonduplicated stool spec…	2022
Madebo, C; Haile, A; Eticha, T; Solomon, F	Hospital-Based Air-Borne and Surface-Borne Bacterial Pathogens and Their Antimicrobial Profiles in Wolaita Sodo, Southern Ethiopia	INTERNATIONAL JOURNAL OF MICROBIOLOGY		SUSCEPTIBILITY PATTERN; DEVELOPING-COUNTRIES; OPERATING-ROOMS; CONTAMINATION; RESISTANCE; TRANSMISSION; WARDS; RISK	Background. It is well documented that hospital environments are the niche/reservoir of many clinically important microorganisms, including multidrug-resistant air-borne and surface-borne pathogens. This problem is the most pressing public health concern, particularly in developing countries like Ethiopia, due to its poor infection management system. This study was planned to detect air-borne and…	2022
Linke, S; Thurmer, A; Bienger, K; Kleber, C; Bellova, P; Lutzner, J; Stiehler, M	Microbiological pathogen analysis in native versus periprosthetic joint infections: a retrospective study	JOURNAL OF ORTHOPAEDIC SURGERY AND RESEARCH	Joint infection; Pathogen spectrum; Synovial fluid; Prosthesis; Native	SEPTIC ARTHRITIS; RISK-FACTORS; HIP; ORGANISMS; THERAPY	Background The presence or absence of an implant has a major impact on the type of joint infection therapy. Thus, the aim of this study was the examination of potential differences in the spectrum of pathogens in patients with periprosthetic joint infections (PJI) as compared to patients with native joint infections (NJI). Methods In this retrospective study, we evaluated culture-positive synovia…	2022
Bao, XL; Tao, T; Tang, N; Wang, YZ; Liao, XQ; Huang, LL; Ji, JJ; Chen, X	Efficacy and safety of adjunctive nebulized colistin sulfate for multidrug-resistant Gram-negative bacteria pneumonia: a retrospective comparative cohort study	ANNALS OF PALLIATIVE MEDICINE	Nebulizer; colistin sulfate; multidrug-resistant (MDR) bacteria; Gram-negative bacteria (GNB); pneumonia	VENTILATOR-ASSOCIATED PNEUMONIA; INFECTIOUS-DISEASES SOCIETY; POLYMYXIN-B; INHALED ANTIBIOTICS; PHARMACOKINETICS; COLISTIMETHATE; GUIDELINES; MANAGEMENT; COMPONENTS; FAILURE	Background: The incidence of multidrug-resistant Gram-negative bacteria (MDR-GNB) pneumonia has increased in the last decade. If antibiotics arc given only through intravenous, the antibiotic concentrations in lung tissue will be insufficient. Recently, nebulized antibiotics have shown effectiveness as an adjunctive therapy with intravenous antibiotics for resistant strains. Therefore, the goal o…	2022
Yang, Y; Dong, H; Wang, S; Sang, YS; Li, ZG; Zhang, L; Wang, CW; Liu, Y	Surface Enhanced Raman Scattering Detection of Four Foodborne Pathogens Using Positively Charged Silver Nanoparticles and Convolutional Neural Networks	CHINESE JOURNAL OF LASERS-ZHONGGUO JIGUANG	bio-optics; foodborne pathogens; surface enhanced Raman scattering; positively charged silver nanoparticles; convolutional neural networks	BACTERIA; SERS; SPECTROSCOPY; POINT	Objective Infectious diseases caused by foodborne pathogenic bacteria are always one of the most severe public health problems. Accurate detection of pathogenic microorganisms in food is necessary to guarantee food safety and to contain bacterial infection. Microbial culture-based methods and biochemical tests are still the golden standard in bacterial detection; however, these methods are time-c…	2022
Hashem, EY; El-dean, AMK; Galal, MS; Tolba, MS	Removal of Cefotaxime Antibiotic from Industrial Wasterwater via Forming a Complex with Fe(III)	JOURNAL OF WATER CHEMISTRY AND TECHNOLOGY	cefotaxime; ferric chloride; UV; FTIR; HPLC	URBAN WASTE-WATER; CEPHALOSPORIN ANTIBIOTICS; SURFACE-WATER; HONG-KONG; DEGRADATION; ADSORPTION; CEPHALEXIN; TOXICITY; PRODUCTS; SPE	Antibiotic pollution in the aquatic environment has emerged as one of the most serious concerns raised by Pharmaceuticals and personal care products (PPCPs). Antibiotic levels in wastewater from antibiotics factories and hospitals have been detected at varying levels. Antibiotics may end up in municipal sewage or hospital wastewater in their original form or as metabolites after being consumed by…	2022
Vargas, JM; Mochi, MPM; López, CG; Alarcón, JA; Acosta, N; Soria, K; Nuñez, JM; Villafañe, S; Ramacciotti, J; del Campo, R; Jure, MA	Impact of an active surveillance program and infection control measures on the incidence of carbapenem-resistant gram-negative bacilli in an intensive care unit	REVISTA ARGENTINA DE MICROBIOLOGIA	Gram-negative bacteria; Carbapenem-resistance; Intensive care unit; Infection control measures; Active surveillance program	ENTEROBACTERIACEAE; EPIDEMIOLOGY; PREVENTION; HOSPITALS; COLONIZATION; PATHOGENS; OUTBREAK; GENES	Hospital-acquired infections caused by carbapenem-resistant Gram-negative bacteria (CRGNB) have been increasingly reported worldwide and are associated with high rates of mortality especially in intensive care units(ICUs). Early identification through rectal surveillance cultures and implementation of infection control measures(ICM) including contact precautions, staff education on cleaning and h…	2022
Sakurai, Y; Watanabe, T; Miura, Y; Uchida, T; Suda, N; Yoshida, M; Nawa, T	Clinical and Bacteriologic Characteristics of Six Cases of Bifidobacterium breve Bacteremia Due to Probiotic Administration in the Neonatal Intensive Care Unit	PEDIATRIC INFECTIOUS DISEASE JOURNAL	Bifidobacterium breve; bacteremia; BBG-01; probiotics	PRETERM INFANTS; NECROTIZING ENTEROCOLITIS; THERAPY	Background: Bifidobacterium breve is widely used as a probiotic in preterm infants and children with congenital surgical conditions, however, some cases of probiotics-induced bacteremia have been reported recently. Objectives: To examine the clinical and bacteriologic features of Bifido-bacterium breve bacteremia caused by a probiotic (BBG-01) in term and preterm infants. Methods: We included 298…	2022
Saleem, M; Rashid, F; Liaqat, I; Liaqat, I; Ulfat, M; Sultan, A; Faiz, M; Eijaz, S; Bibi, A	Phenotypic and Molecular Characterization of CTX-M Type B-Lactamases in Gram Negative Bacterial Strains Isolated from Hospitals, Lahore, Pakistan	JOURNAL OF OLEO SCIENCE	antibiotic resistance; ESBL; CTX-M; PCR; Pakistan	SPECTRUM BETA-LACTAMASE; ESCHERICHIA-COLI; INFECTIONS; PREVALENCE; RESISTANCE; EPIDEMIOLOGY; EUROPE	One of the principal mechanisms that contribute resistance to antibiotics is the production of extended spectrum beta lactamase (ESBL) in Gram negative bacteria. In the present study, molecular methods were used to evaluate the prevalence of the extended-spectrum beta-lactamase (ESBL)-encoding CTX-M gene among Gram negative bacterial strains. In total, 148 clinical samples were collected from dif…	2022
Rai, JR; Amatya, R; Rai, SK	Hand and nasal carriage of Staphylococcus aureus and its rate of recolonization among healthcare workers of a tertiary care hospital in Nepal	JAC-ANTIMICROBIAL RESISTANCE		RESISTANT S.-AUREUS; MUPIROCIN RESISTANCE; PREVALENCE	Background Carriers of Staphylococcus aureus among healthcare workers (HCWs) can spread the bacteria to patients and the environment, in addition to their own risk of infection. Objectives To determine the prevalence of S. aureus carriers among HCWs and the rate of recolonization after decolonization therapy with mupirocin. Methods Nasal and hand swabs from HCWs of a tertiary care hospital in Nep…	2022
Olsen, M; Nassar, R; Senok, A; Moloney, S; Lohning, A; Jones, P; Grant, G; Morgan, M; Palipana, D; McKirdy, S; Alghafri, R; Tajouri, L	Mobile phones are hazardous microbial platforms warranting robust public health and biosecurity protocols	SCIENTIFIC REPORTS			Advancements in technology and communication have revolutionised the twenty-first century with the introduction of mobile phones and smartphones. These phones are known to be platforms harbouring microbes with recent research shedding light on the abundance and broad spectrum of organisms they harbour. Mobile phone use in the community and in professional sectors including health care settings is…	2022
Martínez-Agüero, S; Soguero-Ruiz, C; Alonso-Moral, JM; Mora-Jiménez, I; Alvarez-Rodríguez, J; Marques, AG	Interpretable clinical time-series modeling with intelligent feature selection for early prediction of antimicrobial multidrug resistance	FUTURE GENERATION COMPUTER SYSTEMS-THE INTERNATIONAL JOURNAL OF ESCIENCE	Explainable artificial intelligence; Multivariate Time Series; Recurrent neural network; Linguistic fuzzy models; Antimicrobial multidrug resistance; Intensive Care Unit		Electronic health records provide rich, heterogeneous data about the evolution of the patients' health status. However, such data need to be processed carefully, with the aim of extracting meaningful information for clinical decision support. In this paper, we leverage interpretable (deep) learning and signal processing tools to deal with multivariate time-series data collected from the Intensive…	2022
Enne, VI; Aydin, A; Baldan, R; Owen, DR; Richardson, H; Ricciardi, F; Russell, C; Nomamiukor-Ikeji, BO; Swart, AM; High, J; Colles, A; Barber, J; Gant, V; Livermore, DM; O'Grady, J	Multicentre evaluation of two multiplex PCR platforms for the rapid microbiological investigation of nosocomial pneumonia in UK ICUs: the INHALE WP1 study	THORAX	bacterial Infection; critical care; pneumonia; respiratory infection	VENTILATOR-ASSOCIATED PNEUMONIA; HOSPITAL-ACQUIRED PNEUMONIA; CLINICAL-PRACTICE GUIDELINES; DIAGNOSIS; MECHANISMS; MANAGEMENT; SOCIETY; IMPACT	Background Culture-based microbiological investigation of hospital-acquired or ventilator-associated pneumonia (HAP or VAP) is insensitive, with aetiological agents often unidentified. This can lead to excess antimicrobial treatment of patients with susceptible pathogens, while those with resistant bacteria are treated inadequately for prolonged periods. Using PCR to seek pathogens and their resi…	2022
Bender, F; Eckerth, L; Fritzenwanker, M; Liese, J; Askevold, I; Imirzalioglu, C; Padberg, W; Hecker, A; Reichert, M	Drug resistant bacteria in perianal abscesses are frequent and relevant	SCIENTIFIC REPORTS		FISTULA-IN-ANO; ANORECTAL ABSCESS; DRAINAGE; BLIND	Perianal abscesses are frequent diseases in general surgery. Principles of standard patient care are surgical drainage with exploration and concomitant treatment of fistula. Antiinfective therapy is frequently applied in cases of severe local disease and perianal sepsis. However, the role of microbiologic testing of purulence from perianal abscesses is disputed and the knowledge concerning bacter…	2022
Singh, S; Acharya, S; Shukla, S; Muneshwar, K	Predisposing Factors of Mycotic Infections in COVID-19 Patients	JOURNAL OF THE SCIENTIFIC SOCIETY	Aspergillosis; candidiasis; COVID-19; mucormycosis	INVASIVE FUNGAL DISEASE; PULMONARY ASPERGILLOSIS; CANDIDA-AURIS; RISK-FACTORS; GLUCOCORTICOIDS; RESISTANCE	The coronavirus disease 2019 pandemic (COVID-19) has led to considerable hike in hospitalizations for pneumonia with multiorgan disease requiring immediate hospital care, maintenance of oxygen saturation level, and severe cases requiring mechanical ventilation. This opens the window of opportunity to microscopic organisms such as different species of fungus including Candida, Aspergillus, Rhizopu…	2022
Pérez, JJ; Moreno-Sanz, B; Navarro, IC; Rubio, CA; Jiménez, BC; Palomino, EE; Alvarez, LF; Rodríguez, JM; Martín, BO; de Pipaón, MS	Nasogastric enteral feeding tubes modulate preterm colonization in early life	PEDIATRIC RESEARCH		INTESTINAL MICROBIOTA; BIOFILM FORMATION; GUT MICROBIOME; POTENTIAL ROLE; INFANTS; TERM; CONTAMINATION; INFECTIONS; IMPACT	Background Preterm infants are generally fed through nasogastric enteral feeding tubes (NEFTs). The aim of this work was to evaluate the role of NEFTs in the initial colonization of the preterm gut and its evolution within the first 2 weeks after birth. Methods For this purpose, fecal and NEFT-derived samples from 30 preterm infants hospitalized in a neonatal intensive care unit (NICU) were colle…	2022
Zhang, EQ; Ou, HL; Jia, LL; Zhang, W; Wang, YM; Wang, XR	Comparative analysis of loop-mediated isothermal amplification combined with microfluidic chip technology and q-PCR in the detection of clinical infectious pathogens	JOURNAL OF CLINICAL LABORATORY ANALYSIS	bacteria; chip; detection; loop-mediated isothermal amplification; microfluidics	RAPID DETECTION; POINT; SALMONELLA; DIAGNOSIS; ASSAY; LAMP	Background Rapid diagnosis of infectious pathogens at an early stage is crucial to stabilize the patient's condition, reduce medical costs, and shorten hospital stays. Currently, some point-of-care tests have their own shortcomings. Therefore, we built a microfluidic chip based on loop-mediated isothermal amplification to can quickly and sensitively detect infectious pathogens. Methods We extract…	2022
El Sherif, HM; Elsayed, M; El-Ansary, MR; Aboshanab, KM; El Borhamy, M; Elsayed, KM	BioFire FilmArray BCID2 versus VITEK-2 System in Determining Microbial Etiology and Antibiotic-Resistant Genes of Pathogens Recovered from Central Line-Associated Bloodstream Infections	BIOLOGY-BASEL	CLABSI; FilmArray BCID2; VITEK-2 system; identification; resistance genes	DIRECT IDENTIFICATION	Simple Summary Central line-associated bloodstream infection (CLABSI) is among the most serious hospital-acquired infections that impose public health threats. Accordingly, the urgent need for a rapid identification method that can identify CLABSI pathogens and their resistance genetic markers is essential for the prompt initiation of adequate antibiotic therapy. This study aimed to evaluate the …	2022
Chukwu, EE; Awoderu, OB; Enwuru, CA; Afocha, EE; Lawal, RG; Ahmed, RA; Olanrewaju, I; Onwuamah, CK; Audu, RA; Ogunsola, FT	High prevalence of resistance to third-generation cephalosporins detected among clinical isolates from sentinel healthcare facilities in Lagos, Nigeria	ANTIMICROBIAL RESISTANCE AND INFECTION CONTROL	Antibiotics; Antimicrobial resistance; MecA; Clinical isolates; Resistance genes; ESBL genes; Staphylococcus aureus; Nigeria	ESCHERICHIA-COLI STRAINS; EPIDEMIOLOGY; VENDORS; PROGRAM; ESBLS	Background Antimicrobial resistance (AMR) in bacterial pathogens is a worldwide concern that demands immediate attention. Most information on AMR originates from high-income countries and little is known about the burden in Africa, particularly Nigeria. Using four sentinel sites (General hospitals) in Lagos State, this study sought to estimate the burden of AMR. Methods This is a hospital-based s…	2022
Li, W; Xu, L; Zhao, HG; Zhu, SS	Analysis of clinical distribution and drug resistance of klebsiella pneumoniae pulmonary infection in patients with hypertensive intra cerebral hemorrhage after minimally invasive surgery	PAKISTAN JOURNAL OF MEDICAL SCIENCES	Hypertensive intracerebral hemorrhage; lung; Klebsiella pneumoniae; clinical distribution; drug resistance	INTRACEREBRAL HEMORRHAGE; HEMATOMA	Objectives: To investigate the clinical distribution and drug resistance of Klebsiella pneumoniae pulmonary infection in patients with hypertensive intracerebral hemorrhage after minimally invasive surgery. Methods: A total of 658 patients with hypertensive intracerebral hemorrhage who underwent minimally invasive surgery admitted to the intensive care unit (ICU) and the Department of Neurology o…	2022
Dela, H; Egyir, B; Majekodunmi, AO; Behene, E; Yeboah, C; Ackah, D; Bongo, RNA; Bonfoh, B; Zinsstag, J; Bimi, L; Addo, KK	Diarrhoeagenic E. coli occurrence and antimicrobial resistance of Extended Spectrum Beta-Lactamases isolated from diarrhoea patients attending health facilities in Accra, Ghana	PLOS ONE		ESCHERICHIA-COLI; KLEBSIELLA-PNEUMONIAE; PREVALENCE	IntroductionDiarrhoea accounts for high morbidity and mortality in children and adults worldwide. Extended Spectrum Beta-Lactamase-Producing Enterobacteriaceae (ESBL-PE) and Diarrhoeagenic Escherichia coli (DEC) contribute to prolonged hospitalization because of their resistance and virulence properties aiding in the spread of diarrhoeal disease and delayed treatment. AimTo determine DEC and the …	2022
Chen, YJ; Er, TK	Distribution of Viral Respiratory Infections during the COVID-19 Pandemic Using the FilmArray Respiratory Panel	BIOMEDICINES	FilmArray respiratory panel; respiratory viral pathogens; COVID-19; coinfection	COMMUNITY-ACQUIRED PNEUMONIA; COINFECTION; SARS-COV-2; EPIDEMIOLOGY; CHILDREN	This study was conducted to evaluate the distribution of respiratory viral pathogens in the emergency department during the coronavirus disease 2019 (COVID-19) pandemic. Between May 2020 and September 2022, patients aged between 0.1 and 98 years arrived at the emergency department of Asia University Hospital, and samples from nasopharyngeal swabs were tested by the FilmArray (TM) Respiratory Pane…	2022
Schimmunech, MS; Lima, EA; Silveira, ÅVBD; de Oliveira, AF; Moreira, CN; de Souza, CM; de Paula, EMN; Stella, AE	Pseudomonas aeruginosa Isolated from the Environment of a Veterinary Academic Hospital in Brazil - Resistance Profile	ACTA SCIENTIAE VETERINARIAE	bacteria; antimicrobial resistance; multidrug resistant; beta-lactamase; biofilm; veterinary care	DOGS; OTITIS	Background: The presence of resistant and potentially virulent bacterial strains in a veterinary hospital environment is a neglected problem. Pseudomonas aeruginosa is an opportunistic microorganism present and circulating in the veterinary hospital environment, of clinical importance and zooanthroponotic transmission of P. aeruginosa has also been reported. The aim of this study was to character…	2022
Rao, MR; Urs, TA; Chitharagi, VB; Shivappa, S; Mahale, RP; Gowda, RS; Shree, K	Rapid identification of carbapenemases by CarbAcineto NP test and the rate of beta-lactamases among Acinetobacter baumannii from a teaching hospital	IRANIAN JOURNAL OF MICROBIOLOGY	AmpC; Beta-lactamase; Carbapenanase; Extended spectrum beta lactamase	MOLECULAR EPIDEMIOLOGY; MBL; ESBL; SPP.	Background and Objectives: Acinetobacter baumannii has emerged as a major organism accounting for hospital acquired infections particularly in intensive care units. Due to production of different kinds of beta lactamases these bacteria have developed drug resistance rendering the treatment of such infections very difficult and expensive. Rapid identification of A. baumannii producing such beta-la…	2022
Jung, EH; Yang, JH; Mun, SJ; Han, SY	Detection of nosocomial pneumonia pathogens using a fluorescence-based device	PHOTODIAGNOSIS AND PHOTODYNAMIC THERAPY	Nosocomial pneumonia pathogens; Fluorescence-based device; Autofluorescence; Fluorescence property; Porphyrin	VENTILATOR-ASSOCIATED PNEUMONIA; HOSPITAL-ACQUIRED PNEUMONIA; DENTAL MICROCOSM BIOFILM; ORAL CARE; AUTOFLUORESCENCE; PLAQUE	Background: Early detection of nosocomial pneumonia pathogens is a significant factor in hospital-acquired pneumonia care. This study aimed to determine the autofluorescence properties of five nosocomial pneumonia pathogens using a fluorescence-based device and to establish evidence for clinical guidelines. Methods: The following bacterial strains were assessed: Acinetobacter baumannii (AB), Esch…	2022
Majhi, J; Mohapatra, D; Chayani, N	The prevalence of Mycoplasma hominis in Outpatients at a Tertiary Care Hospital in East India	CUREUS JOURNAL OF MEDICAL SCIENCE	prevalence; polymerase chain reaction; mycoplasma; genital mycoplasma; culture	ANTIMICROBIAL SUSCEPTIBILITY; UREAPLASMA-UREALYTICUM; CHLAMYDIA-TRACHOMATIS; GENITAL MYCOPLASMA; PREGNANT-WOMEN	Introduction Mycoplasma hominis (M. hominis) is the first Mycoplasma isolated from humans in the year 1937. Though regarded as a commensal of the urogenital tract, it has been implicated in various genital and extra-genital infections namely bacterial vaginosis, cervicitis, pelvic inflammatory diseases, pyelonephritis, premature rupture of the membrane in pregnancy, infertility, sepsis in newborn…	2022
Deng, WH; Xu, H; Wu, YB; Li, J	Diagnostic value of bronchoalveolar lavage fluid metagenomic next-generation sequencing in pediatric pneumonia	FRONTIERS IN CELLULAR AND INFECTION MICROBIOLOGY	metagenomic next-generation sequencing (mNGS); conventional microbiological tests (CMTs); bronchoalveolar lavage fluid (BALF); pediatric; pneumonia		ObjectivesThe aim of this study was to evaluate the diagnostic value of bronchoalveolar lavage fluid (BALF) metagenomic next-generation sequencing (mNGS) versus conventional microbiological tests (CMTs) for pediatric pneumonia. MethodsThis retrospective observational study enrolled 103 children who were diagnosed with pneumonia and hospitalized at Hubei Maternity and Child Health Care Hospital be…	2022
Van Der Westhuyzen, M; Samodien, N; Brink, AJ; Moodley, C	Utility of the BioFire® FilmArray® Pneumonia Panel plus assay for syndromic testing of lower respiratory tract infections in a low/middle-income setting	JAC-ANTIMICROBIAL RESISTANCE		COMMUNITY-ACQUIRED PNEUMONIA; DISEASES SOCIETY; ADULTS; GUIDELINES; MANAGEMENT	Background: Determining lower respiratory tract infection (LRTI) aetiology is complex. Culture-based methods are laborious with poor sensitivity. Molecular assays improve detection of potential pathogens, but incorrect interpretation of results may lead to inappropriate antimicrobial therapy. Methods: The utility of the BioFire((R)) FilmArray((R)) Pneumonia Panel plus (FA-PP) to detect LRTI patho…	2022
Shen, XY; Feng, B; Shi, WY; Cheng, WM; Zhang, TF	Concomitant viral and bacterial pneumonia among patients in ICU with mechanical respiratory support	JOURNAL OF INFECTION IN DEVELOPING COUNTRIES	Concomitant infection; Biofire? FilmArray? Pneumonia Panel; VAP	VENTILATOR-ASSOCIATED PNEUMONIA; INTENSIVE-CARE-UNIT; NOSOCOMIAL INFECTIONS; COINFECTION; DIAGNOSIS	Introduction: The use of mechanical ventilators in the intensive care unit (ICU) is often associated with higher risk of respiratory tract infections, including ventilator-associated pneumonia (VAP). Concomitant bacterial-viral infection was reported to worsen patient's clinical condition. This study evaluated the rate of concomitant bacterial-viral infections in patients with VAP and analyzed th…	2022
Li, JW; Guo, LW; Tao, SY; Deng, YH; Yang, C; Qiao, F	Analysis of healthcare-associated infection in patients with pulmonary arterial hypertension associated with congenital heart disease in PICU: Evidence from a tertiary hospital in western China	FRONTIERS IN PEDIATRICS	healthcare-associated infection; pediatric intensive care unit; device utilization rate; targeted surveillance; pulmonary arterial hypertension associated with congenital heart disease; device-related infection		ObjectiveThe present study intends to analyze the targeted surveillance and risk factors for healthcare-associated infection (HAI) in patients with pulmonary arterial hypertension associated with congenital heart disease (CHD-PAH) in a Pediatric intensive care unit (PICU), and provide basis for formulating relevant prevention and control measures of HAI. MethodsChildren (<= 14 years old) who were…	2022
Treffon, J; Heppner, B; Eismann, J; Bothe, J; Omengo, B; Mellmann, A	Single Nucleotide Polymorphism-Based Real-Time PCR Screening Assay for Rapid Tracking of Bacterial Infection Clusters To Complement Whole-Genome Sequencing Efforts during Outbreak Investigations	MICROBIOLOGY SPECTRUM	cluster detection; genome sequencing; single nucleotide polymorphisms; signature search; real-time PCR; software evaluation	RESISTANT-BACTERIA; STRAINS; IDENTIFICATION; EPIDEMIOLOGY; ALIGNMENT; PRIMERS	Infection clusters of multidrug-resistant bacteria increase mortality and entail expensive infection control measures. Whereas whole-genome sequencing (WGS) is the current gold standard to confirm infection clusters, PCR-based assays targeting cluster-specific signatures, such as single nucleotide polymorphisms (SNPs) derived from WGS data, are more suitable to initially screen for cluster isolat…	2022
da Silva, PP; da Silva, FA; Rodrigues, CAS; Souza, LP; de Lima, EM; Pereira, MHB; Candella, CN; Alves, MZD; Lourenço, ND; Tassinari, WS; Barcellos, C; Gomes, MZR	Geographical information system and spatial-temporal statistics for monitoring infectious agents in hospital: a model using Klebsiella pneumoniae complex	ANTIMICROBIAL RESISTANCE AND INFECTION CONTROL	Surveillance; Hospital infection; Antimicrobial resistance; Klebsiella pneumoniae; Time series; Geographic information system; Spatial-temporal statistics	ENTEROBACTERIACEAE; EPIDEMIOLOGY; TRANSMISSION; IDENTIFICATION; BACTERIA; RISK	Background The emergence and spread of antimicrobial resistance and infectious agents have challenged hospitals in recent decades. Our aim was to investigate the circulation of target infectious agents using Geographic Information System (GIS) and spatial-temporal statistics to improve surveillance and control of healthcare-associated infection and of antimicrobial resistance (AMR), using Klebsie…	2021
Lakhani, SJ; Mehta, SJ; Panjwani, DM; Lakhani, JD	Microbiological Profile of Nosocomial Infections Due to Gram Negative Lactose Non-fermentative Bacteria in A Teaching Hospital of Gujarat	JOURNAL OF PURE AND APPLIED MICROBIOLOGY	Hospital acquired infection; Nosocomial infection; Non fermentative gram-negative bacteria; Antimicrobial susceptibility pattern		Hospital acquired infections caused by Non-fermentative gram-negative bacteria (NFGNB) have features that are of specific concern, detection of which is helpful for prevention and for better quality of healthcare in hospital premises. Present study was conducted to find out the nosocomial infections caused by NFGNB and its sensitivity pattern. Present microbiological study was carried out at C.U.…	2021
Mazloomirad, F; Hasanzadeh, S; Sharifi, A; Nikbakht, G; Roustaei, N; Khoramrooz, SS	Identification and detection of pathogenic bacteria from patients with hospital-acquired pneumonia in southwestern Iran; evaluation of biofilm production and molecular typing of bacterial isolates	BMC PULMONARY MEDICINE	Hospital-acquired pneumonia; Acinetobacter baumannii; Biofilms; Molecular typing; MRSA	VENTILATOR-ASSOCIATED PNEUMONIA; STAPHYLOCOCCUS-AUREUS STRAINS; METHICILLIN-RESISTANT; ANTIBIOTIC SUSCEPTIBILITY; ACINETOBACTER-BAUMANNII; VIRULENCE GENES; PREVALENCE; IMPACT; ADULTS	Background Hospital-acquired pneumonia (HAP) is the second most common nosocomial infection in intensive care units (ICUs). The present study aims to determine the prevalence of pathogenic bacteria, their biofilm formation, and molecular typing from patients with HAP in southwestern Iran. Methods Fifty-eight patients with HAP participated in this cross-sectional study. Sputum and endotracheal asp…	2021
Zeng, LY; Yang, CR; Zhang, JS; Hu, KW; Zou, JB; Li, J; Wang, JM; Huang, W; Yin, LN; Zhang, XL	An Outbreak of Carbapenem-Resistant Klebsiella pneumoniae in an Intensive Care Unit of a Major Teaching Hospital in Chongqing, China	FRONTIERS IN CELLULAR AND INFECTION MICROBIOLOGY	intensive care unit; carbapenem-resistant Klebsiella pneumoniae; outbreak; molecular epidemiology; ST11	MEDIATED QUINOLONE RESISTANCE; ANTIMICROBIAL RESISTANCE; HEILONGJIANG PROVINCE; COLISTIN RESISTANCE; VIRULENCE FACTORS; HIGH PREVALENCE; EPIDEMIOLOGY; STRAINS; PLASMID; ST11	Background Due to the critical condition and poor immunity of patients, the intensive care unit (ICU) has always been the main hospital source of multidrug-resistant bacteria. In recent years, with the large-scale use of antibiotics, the detection rate and mortality of carbapenem-resistant Klebsiella pneumoniae (CRKP) have gradually increased. This study explores the molecular characteristics and…	2021
Aleem, M; Azeem, AR; Rahmatullah, S; Vohra, S; Nasir, S; Andleeb, S	Prevalence of Bacteria and Antimicrobial Resistance Genes in Hospital Water and Surfaces	CUREUS JOURNAL OF MEDICAL SCIENCE	colistin resistance; multi-drug resistant bacteria; beta-lactamases; hospital surfaces; hospital tap water; antibiotic resistance genes; transmission; antimicrobial resistance	ANTIBIOTIC-RESISTANCE; PSEUDOMONAS-AERUGINOSA; MECHANISMS; RIVER	Purpose Antimicrobial resistance (AMR) has become a worldwide environmental and public health problem, causing more than 250,000 deaths per year. Unregulated usage, unsafe hospital practices, and misuse in veterinary contribute to the development of multidrug resistance in various bacteria. Hospital water was hypothesized to be a hotspot for AMR transmission because of (1) increased exposure to a…	2021
Karasin, G; Bayram, Y; Parlak, M; Aypak, C; Akgül, M; Güdücüoglu, H	The evaluation of vancomycin-resistant enterococci and carbapenamase producing Klebsiella colonization among ICU-Hospitalized Patients	AFRICAN HEALTH SCIENCES	Carbapenam resistant klebsiella pneumoniae; vancomycin-resistant enterococci; intensive care units	MOLECULAR CHARACTERIZATION; PNEUMONIAE COLONIZATION; EPIDEMIOLOGY; CARBAPENEMASE; SURVEILLANCE; VANA	Background: Multi-drug resistant organisms, especially Vancomycin-Resistant Enterococcus (VRE) and Carbapenam Resistant Klebsiella pneumoniae (KPC), are serious health threat. Early detection of resistant bacteria colonization among patients in intensive care units (ICUs) not only enables effective treatment but more importantly prevents disease and limits transmission. Therefore, we aimed to to …	2021
Chen, H; Yang, L; Cheng, L; Hu, XH; Shen, YM	Distribution and drug resistance of pathogens in burn patients in China from 2006 to 2019	WORLD JOURNAL OF CLINICAL CASES	Drug resistance; Pathogen distribution; Burn; Bacterial species; Infection		BACKGROUND In this study, recent trends in the distribution and drug resistance of pathogenic bacteria isolated from patients treated at a burn ward between 2006 and 2019 were investigated. AIM To develop more effective clinical strategies and techniques for the prevention and treatment of bacterial infections in burn patients. METHODS Clinical samples with positive bacteria were collected from p…	2021
de Souza, SGP; dos Santos, IC; Bondezan, MAD; Corsatto, LFM; Caetano, ICD; Zaniolo, MM; da Matta, R; Merlini, LS; Barbosa, LN; Gonçalves, DD	Bacteria with a Potential for Multidrug Resistance in Hospital Material	MICROBIAL DRUG RESISTANCE	antimicrobial; hospital infections; bacterial resistance; one health	STAPHYLOCOCCUS-AUREUS; ANTIBIOTIC-RESISTANCE; ESCHERICHIA-COLI; EPIDEMIOLOGY; HANDS	The objective of this research was to determine the antimicrobial resistance of bacteria isolated from items related to hygiene and antisepsis, equipment, and instruments used in different hospital wards. Bacterial isolation and identification, phenotypic antimicrobial susceptibility assays, mecA gene detection, and multiple antimicrobial resistance index analysis were performed. In total, 105 ba…	2021
Moschou, A; Ioannou, P; Maraki, S; Koutroumpakis, F; Mamaloukaki, M; Bikis, C; Samonis, G; Papadakis, JA; Kofteridis, DP	A prospective study of epidemiology characteristics and outcomes of bloodstream infections in older patients	AUSTRALASIAN JOURNAL ON AGEING	bacteraemia; geriatrics; older; prospective	TERTIARY-CARE; MORTALITY; SEPSIS; BURDEN; ADULTS; AGE	Objective This study aimed to investigate the characteristics of bloodstream infections (BSIs) in older patients and describe the differences between community-acquired, hospital-acquired and health care-associated BSIs. Methods A prospective observational study was conducted at the University Hospital of Heraklion, Crete, Greece. Epidemiology, clinical characteristics and outcomes of BSIs were r…	2021
Zhang, D; Zhang, MJ; Chen, H; Chen, LJ; Bai, FM; Chen, J; Wang, YM; Zhou, Z	Clinical and Hematological Characteristics of Patients with COVID-19 Co-infected with Bacteria	JUNDISHAPUR JOURNAL OF MICROBIOLOGY	COVID-19; Co-infection; Hematology Test; Klebsiella pneumoniae; Retrospective Studies	PNEUMONIA	Background: The pandemic caused by the new coronavirus is overwhelming the world. Bacteria and fungi were detected in some cases, which suggested the associations between COVID-19 and bacterial and fungal infections. Objectives: To provide suggestions and treatment opinions by analyzing laboratory data of COVID-19 patients co-infected with bacteria. Methods: We analyzed 63 patients with COVID-19 …	2021
Katagiri, M; Kuroda, M; Sekizuka, T; Nakada, N; Ito, Y; Otsuka, M; Watanabe, M; Kusachi, S	Comprehensive Genomic Survey of Antimicrobial-Resistance Bacteria in the Sewage Tank Replacement with Hospital Relocation	INFECTION AND DRUG RESISTANCE	hospital sewage; antimicrobial resistance; antimicrobial resistance gene; metagenome analysis; whole genome sequencing; residual antimicrobial reagents	WATER TREATMENT PLANTS; ESCHERICHIA-COLI; WASTE-WATER; IDENTIFICATION; ANTIBIOTICS; PREVALENCE; MICROBIOTA; PRODUCTS; REMOVAL; PEOPLE	Background: Excrement containing antimicrobial-resistant bacteria (ARB) is discharged from the hospital sewage through wastewater treatment plants (WWTP) into rivers, increasing the antimicrobial resistance (AMR) burden on the environment. Purpose: We illustrate the contamination of hospital sewage tanks with ARB harboring antimicrobial resistance genes (ARGs) using comprehensive metagenomic sequ…	2021
Lara, MO; Lucas, TC; Kalapothakis, E; Thomasini, RL; Machado, CJ	Molecular tracking of pathogens in central venous catheter	JOURNAL OF VASCULAR ACCESS	Catheter-related infections; cross infection; catheters; polymerase chain reaction	BLOOD-STREAM INFECTIONS; CARE-ASSOCIATED INFECTIONS; POINT-PREVALENCE SURVEY; VASCULAR CATHETER; DIAGNOSIS; CULTURE; PCR; HOSPITALS; IDENTIFICATION; PREVENTION	Background: Central venous catheter-related bloodstream infection is an important adverse event in health care. Molecular methods are not yet substitutive of microbiological in the detection of the pathogens responsible for the infection, but they can help in the epidemiological characterization. Aim: To detect bacteria by polymerase chain reaction, from material extracted from the tip of central…	2021
Casna, BR; Simmerson, SM; Subashchandrabose, S	Feasibility study evaluating a veterinary point-of-care urine culture system for diagnosing septic peritonitis	JOURNAL OF VETERINARY EMERGENCY AND CRITICAL CARE	bacteria; peritoneal effusion; sepsis	TRACT-INFECTIONS; DOGS; FLUID	Objective To evaluate the use of a veterinary point-of-care urine culture system (POCUCS) for the diagnosis of septic peritonitis. Design Prospective feasibility study performed between August 2017 and April 2018. Setting Private referral hospital. Animals Twenty samples of naturally occurring canine peritoneal effusion collected via aseptic abdominocentesis. Procedures Point-of-care urine cultur…	2021
Zhou, M; Xiao, M; Hou, RY; Wang, DQ; Yang, M; Chen, M; Chen, L	Bundles of care for prevention of ventilator-associated pneumonia caused by carbapenem-resistant Klebsiella pneumoniae in the ICU	AMERICAN JOURNAL OF TRANSLATIONAL RESEARCH	Bundles of care; intensive care unit; ventilator-associated pneumonia; efficacy of prevention		Objective: To investigate the treatment efficacy of bundles of care for the prevention of ventilator-associated pneumonia (VAP) caused by carbapenem-resistant Klebsiella pneumoniae in the intensive care unit (ICU). Methods: A total of 102 patients undergoing mechanical ventilation in the ICU of our hospital were randomly assigned into a research group (n=51, bundles of care) and a control group (…	2021
Xu, QY; Zhuang, HL; Xie, YY	Study on the related risk factors and targeted nursing effects in multi-drug resistant bacteria infections in elderly patients with stroke-associated pneumonia	AMERICAN JOURNAL OF TRANSLATIONAL RESEARCH	Stroke; associated pneumonia; multi-drug resistant; infection; risk factors; etiology	LACTAMASE-PRODUCING ENTEROBACTERIACEAE; INTENSIVE-CARE-UNIT; COLONIZATION; DISORDERS; OUTCOMES	Purpose: to explore the related risk factors and targeted nursing effects in multi-drug resistant bacteria (MDRB) infection in elderly patients with stroke-associated pneumonia. Methods: We selected 100 elderly patients with MDRB who received SAP in the hospital encephalology department from May 2011 to November 2014, and pathogenic detection and drug susceptibility tests were performed on the sp…	2021
Hazhirkamal, M; Zarei, O; Movahedi, M; Karami, P; Shokoohizadeh, L; Taheri, M	Molecular typing, biofilm production, and detection of carbapenemase genes in multidrug-resistant Acinetobacter baumannii isolated from different infection sites using ERIC-PCR in Hamadan, west of Iran	BMC PHARMACOLOGY & TOXICOLOGY	Molecular typing; Biofilm formation; MBL; MDR; Acinetobacter baumannii	METALLO-BETA-LACTAMASE; DETERMINANTS; SOUTHWEST; VIRULENCE; MILITARY; 1ST	Background Acinetobacter baumannii is an opportunistic pathogen that can cause several kinds of nosocomial infections. Increasing antibiotic resistance as well as identifying genetic diversity and factors associated with pathogenicity and prevalence of this bacterium is important. The aim of this study was the investigation of molecular typing, biofilm production, and detection of carbapenemase g…	2021
Nishida, S; Nakagawa, M; Ouchi, Y; Sakuma, C; Nakajima, Y; Shimizu, H; Shibata, T; Kurosawa, Y; Maruyama, T; Okumura, CJ; Hatayama, N; Sato, Y; Asahara, M; Ishigaki, S; Furukawa, T; Akuta, T; Ono, Y	A rabbit monoclonal antibody-mediated lateral flow immunoassay for rapid detection of CTX-M extended-spectrum β-lactamase-producing Enterobacterales	INTERNATIONAL JOURNAL OF BIOLOGICAL MACROMOLECULES	CTX-M; ESBL; Lateral flow immunoassay; LFIA; Point-of-care test; POCT	ASSAY; GENES; NDM; IDENTIFICATION; OXA-48-LIKE; RESISTANCE; BAUMANNII; STRIPS; SET; KPC	Infections of CTX-M extended-spectrum beta-lactamase-producing Enterobacterales are a severe threat in clinical settings. CTX-M genes on plasmids have been transferred to many Enterobacterales species, and these species have spread, leading to the global problem of antimicrobial resistance. Here, we developed a lateral flow immunoassay (LFIA) based on an anti-CTX-M rabbit monoclonal antibody. Thi…	2021
Kung, A; Chen, J; Tomasek, M; Liu, DK; Rodgers, W; Gau, V	Transportation protocols for accurate assessment of microbial burden classification using molecular methods	SCIENTIFIC REPORTS			Point-of-care testing is cost-effective, rapid, and could assist in avoiding hospital visits during a pandemic. However, they present some significant risks that current technologies cannot fully address. Skin flora contamination and insufficient specimen volume are two major limitations preventing self-collection microbiological testing outside of hospital settings. We are developing a hybrid te…	2021
Calderaro, A; Buttrini, M; Montecchini, S; Piccolo, G; Martinelli, M; Dell'Anna, ML; Di Maio, A; Arcangeletti, MC; Maccari, C; De Conto, F; Chezzi, C	Detection of SARS-CoV-2 and Other Infectious Agents in Lower Respiratory Tract Samples Belonging to Patients Admitted to Intensive Care Units of a Tertiary-Care Hospital, Located in an Epidemic Area, during the Italian Lockdown	MICROORGANISMS	respiratory viruses; SARS-CoV-2; diagnosis; bacteria; pandemic; molecular assays; fungi	OUTBREAK	The aim of this study was the detection of infectious agents from lower respiratory tract (LRT) samples in order to describe their distribution in patients with severe acute respiratory failure and hospitalized in intensive care units (ICU) in an Italian tertiary-care hospital. LRT samples from 154 patients admitted to ICU from 27 February to 10 May 2020 were prospectively examined for respirator…	2021
Sommer, L; Hackel, T; Hofmann, A; Hoffmann, J; Hennebach, E; Koepke, B; Sydow, W; Ehrhard, I; Chaberny, IF	Multi-Resistant Bacteria in Patients in Hospitals and Medical Practices as well as in Residents of Nursing Homes in Saxony - Results of a Prevalence Study 2017/2018	GESUNDHEITSWESEN	point prevalence; MDRO colonisation; Saxony; inpatient; elderly care; outpatient	RESISTANT STAPHYLOCOCCUS-AUREUS; LONG-TERM-CARE; COLONIZATION; EPIDEMIOLOGY	Objective The aim of this study was to determine the prevalence of methicillin-resistant Staphylococcus aureus (MRSA), multi-resistant gram-negative bacteria (MRGN) and vancomycin-resistant enterococci (VRE) in three study groups (hospital patients, residents in nursing homes for the elderly and patients in GP practices) and additionally, risk factors for carriage of multidrug-resistant organisms…	2021
Ashokan, A; Choo, JM; Taylor, SL; Lagana, D; Shaw, DR; Warner, MS; Wesselingh, SL; Rogers, GB	Environmental dynamics of hospital microbiome upon transfer from a major hospital to a new facility	JOURNAL OF INFECTION	Environmental microbiome; Hospital occupancy; 16s sequencing	STAPHYLOCOCCUS-AUREUS; PCR	Background: Infection control is critical to safe hospital care. However, how bacteria within nosocomial environments relate to space utilisation and occupancy remains poorly understood. Our aim was to char-acterise the hospital microbiome in the context of the closure of a tertiary hospital and the opening of a new facility. Methods: Environmental swabs were collected from common and inpatient a…	2021
Elshamy, AA; Saleh, SE; Alshahrani, MY; Aboshanab, KM; Aboulwafa, MM; Hassouna, NA	OXA-48 Carbapenemase-Encoding Transferable Plasmids of Klebsiella pneumoniae Recovered from Egyptian Patients Suffering from Complicated Urinary Tract Infections	BIOLOGY-BASEL	antimicrobial resistance; carbapenemase genes; urinary tract infections; plasmids; Gram-negative bacteria; carbapenem-resistant Enterobacteriaceae	BETA-LACTAMASE; ESCHERICHIA-COLI; ENTEROBACTERIACEAE; PSEUDOMONAS; GENES; MANAGEMENT; PRODUCERS	Simple Summary Gram-negative bacteria are common causes of urinary tract infections (UTIs), some of which can resist treatment by antibiotics, including carbapenems, which are last resort treatment options. This study aimed to report the resistance of some Gram-negative bacteria causing complicated UTIs to carbapenems at two important hospitals in Cairo, Egypt, and to determine the possible trans…	2021
Truong, PT; Saito, S; Takayama, I; Furuya, H; Nguyen, BG; Do, TV; Phan, PT; Do, CD; Dao, CX; Pham, TT; Dang, TQ; Ngo, CQ; Le, NT; Bui, VM; Le, DT; Vu, VTT; Pham, TTP; Arashiro, T; Kageyama, T; Nakajima, N	Respiratory microbes detected in hospitalized adults with acute respiratory infections: associations between influenza A(H1N1)pdm09 virus and intensive care unit admission or fatal outcome in Vietnam (2015-2017)	BMC INFECTIOUS DISEASES	Respiratory microbes; Acute respiratory infection; Multiplex real-time PCR; Vietnam	HONG-KONG; CHILDREN; PATHOGENS; ETIOLOGY; ILLNESS; PCR	Background Acute respiratory tract infection (ARI) is a leading cause of hospitalization, morbidity, and mortality worldwide. Respiratory microbes that were simultaneously detected in the respiratory tracts of hospitalized adult ARI patients were investigated. Associations between influenza A(H1N1)pdm09 virus (H1N1pdm) detection and intensive care unit (ICU) admission or fatal outcome were determ…	2021
Maldonado-Garza, HJ; Garza-González, E; Bocanegra-Ibarias, P; Flores-Treviño, S	Diagnostic syndromic multiplex approaches for gastrointestinal infections	EXPERT REVIEW OF GASTROENTEROLOGY & HEPATOLOGY	Diagnostic; gastrointestinal; multiplex; syndromic	ENTERIC BACTERIAL PANEL; TIME PCR ASSAY; ESCHERICHIA-COLI; MOLECULAR PANELS; PATHOGEN PANEL; MULTICENTER EVALUATION; CLINICAL-EVALUATION; XTAG GPP; DIARRHEA; PERFORMANCE	Introduction: Gastrointestinal diseases due to infectious pathogens currently represent an important global health concern, especially in children and developing countries. Early and accurate detection of gastrointestinal pathogens is important to initiate the appropriate type of therapy. Multiplex molecular gastrointestinal panels rapidly detect several gastrointestinal pathogens at once with hi…	2021
Fontana, C; Favaro, M; Minelli, S; Bossa, MC; Altieri, A	Co-infections observed in SARS-CoV-2 positive patients using a rapid diagnostic test	SCIENTIFIC REPORTS		COVID-19; BACTERIAL; CARE	Rapid diagnostic tests are tools of paramount impact both for improving patient care and in antimicrobial management programs. Particularly in the case of respiratory infections, it is of great importance to quickly confirm/exclude the involvement of pathogens, be they bacteria or viruses, while obtaining information about the presence/absence of a genetic target of resistance to modulate antibio…	2021
Thabet, C; Gottlieb, CCC; Hurley, BR; Zhang, GJ; Sherazi, A; Angel, JB	Intravenous administration of Penicillin results in therapeutic intravitreal levels in chronic postoperative endophthalmitis	JOURNAL OF OPHTHALMIC INFLAMMATION AND INFECTION			Importance: The role of systemic antibiotics in the treatment of bacterial endophthalmitis remains controversial. While penicillin is a highly effective antibiotic against bacteria that frequently cause endophthalmitis, the ability of systemically administered Penicillin G to penetrate into the vitreous at adequate therapeutic concentrations has not been studied. Its role in the treatment of endo…	2021
Podlesny, D; Fricke, WF	Strain inheritance and neonatal gut microbiota development: A meta-analysis	INTERNATIONAL JOURNAL OF MEDICAL MICROBIOLOGY	Neonatal microbiome; Microbiota maturation; Strain tracking; Metagenomics; Cesarean section; Birth type; Vaginal delivery	CESAREAN-BORN INFANTS; FECAL MICROBIOTA; BODY HABITATS; 1ST YEAR; HEALTH; MODE; DYNAMICS; DELIVERY; IMPACT; TRANSMISSION	As many inflammatory and metabolic disorders have been associated with structural deficits of the human gut microbiota, the principles and mechanisms that govern its initialization and development are of considerable scientific interest and clinical relevance. However, our current understanding of the developing gut microbiota dynamics remains incomplete. We carried out a large-scale, comprehensi…	2021
Aljuhani, O; Al Sulaiman, K; Alshabasy, A; Eljaaly, K; Al Shaya, AI; Noureldeen, H; Aboudeif, M; Al Dosari, B; Alkhalaf, A; Korayem, GB; Aleissa, MM; Badreldin, HA; Al Harbi, S; Alhammad, A; Vishwakarma, R	Association between tocilizumab and emerging multidrug-resistant organisms in critically ill patients with COVID-19: A multicenter, retrospective cohort study	BMC INFECTIOUS DISEASES	COVID-19; SARS-Cov-2; Tocilizumab; Secondary infection; CRE; Critically ill; Intensive care units (ICUs); Immunomodulatory drugs	CORONAVIRUS DISEASE 2019; RISK-FACTORS; EFFICACY; SINGLE; SAFETY	Background Tocilizumab is an IgG1 class recombinant humanized monoclonal antibody that directly inhibits the IL-6 receptor. Several randomized clinical trials have evaluated its safety and efficacy in patients with coronavirus disease 2019 (COVID-19), and these studies demonstrate conflicting results. Our study aimed to determine the association between tocilizumab treatment and microbial isolati…	2021
Lee, CY; Degani, I; Cheong, J; Weissleder, R; Lee, JH; Cheon, J; Lee, H	Development of Integrated Systems for On-Site Infection Detection	ACCOUNTS OF CHEMICAL RESEARCH		RAPID DETECTION; DIAGNOSIS; DISEASES; BACTERIA	The modern healthcare system faces an unrelenting threat from microorganisms, as evidenced by global outbreaks of new viral diseases, emerging antimicrobial resistance, and the rising incidence of healthcare-associated infections (HAIs). An effective response to these threats requires rapid and accurate diagnostic tests that can identify causative pathogens at the point of care (POC). Such tests …	2021
Cortés-Ortíz, IA; Juárez-Gómez, JC; Cu-Quijano, C; Flores-Paz, R; Durán-Manuel, EM; Cruz-Cruz, C; Gutiérrez-Muñoz, VH; Sosa-Hernández, O; Escobar-Escamilla, N; Bravata-Alcántara, JC; Delgado-Balbuena, L; Ibáñez-Cervantes, G; Bello-López, JM	Klebsiella pneumoniae blaNDM-1 carrying a class 1 integron causing a hospital outbreak in a Mexican attention center	JOURNAL OF INFECTION IN DEVELOPING COUNTRIES	Hospital outbreak; Klebsiella pneumoniae; bla(NDM-1); class 1 integron	METALLO-BETA-LACTAMASE; BLOOD-STREAM INFECTIONS; RESISTANT ENTEROCOCCUS; ANTIBIOTIC-RESISTANCE; GENE CASSETTES; EPIDEMIOLOGY; DETERMINANTS; PCR; IDENTIFICATION; CONTAMINATION	Introduction: Infections acquired in hospitals are the cause of high morbidity and mortality and with the emergence of resistant bacteria, the problem is greater. The aim of this work was to determine the genetic characteristics and timeline of Klebsiella pneumoniae bla(NDM-1) carrying a class 1 integron involved in an intrahospital outbreak. Methodology: Investigation was made from the first det…	2021
Souders, CP; Scott, VCS; Ackerman, JE; Khalique, MU; Eilber, KS; Anger, JT; Ackerman, AL	Mycoplasma and Ureaplasma Molecular Testing Does Not Correlate with Irritative or Painful Lower Urinary Tract Symptoms	JOURNAL OF UROLOGY	lower urinary tract symptoms; Mycoplasma; Ureaplasma; urethritis; microbiota	UREALYTICUM; WOMEN; PREVALENCE; ASSOCIATION; COINFECTION; FREQUENCY; CYSTITIS; HOMINIS; COHORT	Purpose: For patients with persistent irritative lower urinary tract symptoms, such as dysuria and urinary frequency, evaluation for the atypical organisms Ureaplasma and Mycoplasma has been a common part of care. However, these species are genitourinary colonizers and have not been established as causative pathogens in chronic lower urinary tract symptoms. We therefore sought to evaluate diagnos…	2021
Souders, CP; Scott, VCS; Ackerman, JE; Khalique, MU; Eilber, KS; Anger, JT; Ackerman, AL	Mycoplasma and Ureaplasma Molecular Testing Does Not Correlate with Irritative or Painful Lower Urinary Tract Symptoms	JOURNAL OF UROLOGY	lower urinary tract symptoms; Mycoplasma; Ureaplasma; urethritis; microbiota	UREALYTICUM; WOMEN; PREVALENCE; ASSOCIATION; COINFECTION; FREQUENCY; CYSTITIS; HOMINIS; COHORT	Purpose: For patients with persistent irritative lower urinary tract symptoms, such as dysuria and urinary frequency, evaluation for the atypical organisms Ureaplasma and Mycoplasma has been a common part of care. However, these species are genitourinary colonizers and have not been established as causative pathogens in chronic lower urinary tract symptoms. We therefore sought to evaluate diagnos…	2021
Xu, N; Liu, C; Feng, Y; Li, F; Meng, X; Lv, Q; Lan, C	Influence of the Internet of Things management system on hand hygiene compliance in an emergency intensive care unit	JOURNAL OF HOSPITAL INFECTION	Internet of Things; Hand hygiene; Hospital infection; Infection control; Medical staff; Intensive care unit	NURSES; PHYSICIANS; ADHERENCE	Background: Hand hygiene is a critical strategy for infection prevention in all healthcare settings. Automated electronic monitoring systems are expected to improve hand hygiene performance. Aim: To investigate the impact of the Internet of Things (IoT) management system on hand hygiene compliance among medical staff in an emergency intensive care unit (EICU). Methods: This retrospective observat…	2021
Oh, SC; Park, SM; Hur, J; Choi, EY; Jin, HJ; Kim, YK; Lee, JH; Ahn, JY; Lee, JM	Effectiveness of rapid multiplex polymerase chain reaction for early diagnosis and treatment of pertussis	JOURNAL OF MICROBIOLOGY IMMUNOLOGY AND INFECTION	Multiplex polymerase chain reaction; Prevention; Bordetella pertussis	BORDETELLA-PERTUSSIS; SOUTH-KOREA; PCR; SURVEILLANCE; TRANSMISSION; MULTICENTER; ADOLESCENTS; ADULTS; PANEL	Background: Pertussis, is an infectious respiratory disease caused by Bordetella pertussis. The incidence of pertussis has been increasing in South Korea to due to waning vaccine-induced immunity. Culture has a low sensitivity and a long turnaround time (TAT). Recently, a rapid multi-polymerase chain reaction (mPCR) test with a TAT of about 1 h was developed for the detection of respiratory patho…	2021
Hanumantha, S; Patil, DS; Naik, TB; Mane, V	Chronic Dacryocystitis: Clinico-Bacteriological Profile and its Antibiogram at a Tertiary care Hospital in Belagavi, Karnataka	JOURNAL OF PURE AND APPLIED MICROBIOLOGY	Antibiotic sensitivity; chronic dacryocystitis; clinical features; eye infections; lacrimal discharge		Chronic dacryocystitis is an infection of the lacrimal sac and occurs due to obstruction of the nasolacrimal duct. It is an important cause of ocular morbidity in India. Objective: 1) To identify various species of aerobic bacteria causing chronic dacryocystitis 2) To determine the antibiotic sensitivity pattern of these bacterial species. At a tertiary care hospital in Belagavi, Karnataka, over …	2021
Xu, CY; Ye, HW; Chen, B; Wu, YF; Cao, Z; Ding, Z; Yao, YP; Gao, Y; Li, J; Zhu, JJ; He, S	Analysis of risk factors and prognosis of post-stroke pulmonary infection in integrated ICU	EUROPEAN REVIEW FOR MEDICAL AND PHARMACOLOGICAL SCIENCES	Stroke; Stroke-associated pneumonia (SAP); Sepsis; Integrated ICU; Prognosis	ACUTE ISCHEMIC-STROKE; PNEUMONIA; SEPSIS; SURVEILLANCE; PREDICTORS; HEMORRHAGE; MORTALITY; UPDATE; COST	OBJECTIVE: The incidence of SAP (stroke-associated pneumonia) is high in integrated ICU (Intensive Care Unit), and it might result in sepsis, which exacerbates the clinical outcome and increases mortality. It is necessary to investigate the epidemiological features of post stroke infection and sepsis, identify the risk factors and analyze the prognosis. PATIENTS AND METHODS: We retrospectively an…	2021
Graff, KE; Palmer, C; Anarestani, T; Velasquez, D; Hamilton, S; Pretty, K; Parker, S; Dominguez, SR	Clinical Impact of the Expanded BioFire Blood Culture Identification 2 Panel in a US Children's Hospital	MICROBIOLOGY SPECTRUM	antibiotic resistance; antimicrobial stewardship; blood culture; diagnostics; multiplex PCR; pediatrics	ENTEROBACTERIACEAE; EPIDEMIOLOGY; INFECTIONS	The BioFire blood culture identification (BCID) panel decreases time to pathogen identification and time to optimal antimicrobial therapy. The BioFire blood culture identification 2 (BCID2) panel is an expanded panel with 17 additional targets and resistance genes; however, there are limited data on its impact in pediatric patients. We compared the BioFire BCID2 panel and the BCID panel by assayi…	2021
Meyer, EC; Alt-Epping, S; Moerer, O; Büttner, B	Fatal septic shock due to Capnocytophaga canimorsus bacteremia masquerading as COVID-19 pneumonia - a case report	BMC INFECTIOUS DISEASES	SARS-CoV-2; Rapid antigen diagnostic test; Capnocytophaga canimorsus; Septic shock; COVID-19; Case report	SEPSIS	BackgroundCapnocytophaga canimorsus (C. canimorsus) infections are rare and usually present with unspecific symptoms, which can eventually end in fatal septic shock and multiorgan failure. The severe acute respiratory syndrome coronavirus 2 (SARS-CoV-2) related coronavirus disease 2019 (COVID-19), on the other hand, is predominantly characterized by acute respiratory failure, although other organ…	2021
Perales, JG; Ortiz, LS; Mafayle, RL; Soto, BM; Flores, LH; Montaño, JL; Calle, NZ; Jarovsky, D; Berezin, EN	Diagnosis of Community-acquired Pneumonia in Hospitalized Children: A Multicenter Experience in Bolivia	PEDIATRIC INFECTIOUS DISEASE JOURNAL	community-acquired pneumonia; etiology; multiplex real-time PCR	INVASIVE PNEUMOCOCCAL DISEASE; CONJUGATE VACCINE; INFECTIONS; ETIOLOGY; IMPACT; BLOOD; MANAGEMENT; FEATURES; BRAZIL; PCR	Background: Community-acquired pneumonia (CAP) represents a major cause of hospitalization, especially among young children. In the third world countries, information about CAP etiology is scarce. Therefore, rapid and highly sensitive diagnostic methods are crucial to determine etiologic agents. Methods: Between March 2016 and March 2017, we have prospectively studied the clinical, radiologic. la…	2021
Hameed, F; Khan, MA; Bilal, H; Muhammad, H; Rehman, TU	Detection of MCR-1 Gene in Multiple Drug Resistant Escherichia coli and Klebsiella pneumoniae in Human Clinical Samples from Peshawar, Pakistan	COMBINATORIAL CHEMISTRY & HIGH THROUGHPUT SCREENING	Multiple drug resistance; colistin resistance; mcr-1; Escherichia coli; Klebsiella pneumoniae; biosynthesis	IDENTIFICATION; EMERGENCE	Background: The presence of plasmid mediated mcr-1 gene in multidrug resistant Gram-negative bacteria poses a serious public health concern in today's world. Objective: The present study was aimed to detect the presence of plasmid mediated mcr-1 encoding resistance to colistin in multiple drug resistant (MDR) E. coli and K. pneumoniae isolates. Methods: A total of 180 clinical isolates of E. coli…	2021
Saktiawati, AMI; Triyana, K; Wahyuningtias, SD; Dwihardiani, B; Julian, T; Hidayat, SN; Ahmad, RA; Probandari, A; Mahendradhata, Y	eNose-TB: A trial study protocol of electronic nose for tuberculosis screening in Indonesia	PLOS ONE		PULMONARY TUBERCULOSIS; DIAGNOSIS	Background Even though conceptually, Tuberculosis (TB) is almost always curable, it is currently the world's leading infectious killer. Patients with pulmonary TB are the source of transmission. Approximately 23% of the world's population is believed to be latently infected with TB bacteria, and 5-15% of them will progress at any point in time to develop the disease. There was a global diagnostic…	2021
Patel, YA; Kirn, TJ; Weinstein, MP; Uprety, P	Systematic Evaluation of the Accelerate Pheno System for Susceptibility Testing of Gram-Negative Bacteria Isolated from Blood Cultures	MICROBIOLOGY SPECTRUM	rapid phenotypic antimicrobial susceptibility test; Accelerate Pheno; Gram-negative; blood cultures		Bacteremia is a major cause of morbidity and mortality. Rapid identification of pathogens for early targeted antimicrobial therapy is crucial for detecting emergence of antibiotic resistance and improving outcomes. However, there are limited data regarding the analytical performance of a rapid identification (ID) and antimicrobial susceptibility testing (AST) method like Accelerate Pheno blood cu…	2021
Hayashi, W; Izumi, K; Yoshida, S; Takizawa, S; Sakaguchi, K; Iyori, K; Minoshima, K; Takano, S; Kitagawa, M; Nagano, Y; Nagano, N	Antimicrobial Resistance and Type III Secretion System Virulotypes of Pseudomonas aeruginosa Isolates from Dogs and Cats in Primary Veterinary Hospitals in Japan: Identification of the International High-Risk Clone Sequence Type 235	MICROBIOLOGY SPECTRUM	Pseudomonas aeruginosa; companion animal; T3SS; ST235	CARBAPENEM-RESISTANCE; EFFLUX SYSTEM; CLINICAL STRAINS; LEVEL RESISTANCE; VIRULENCE; GENES; CANINE; DISSEMINATION; EPIDEMIOLOGY; MECHANISMS	This study aimed to investigate the current trends in antimicrobial resistance among Pseudomonas aeruginosa clinical isolates of canine and feline origin and the prevalence of their sequence types (STs) and type III secretion system (T3SS) virulotypes, which remains unknown in Japan. A total of 240 nonduplicate clinical isolates of P. aeruginosa from dogs (n = 206) and cats (n = 34) collected fro…	2021
Ramakrishna, MS; Abimannan, GC; Jeyamani, L; Ramalingam, A; Anbalagan, K	Burden of Multidrug Resistant Escherichia coli among Patients with Urinary Tract Infections in a Tertiary Care Centre- A Retrospective Analysis	JOURNAL OF CLINICAL AND DIAGNOSTIC RESEARCH	AmpC beta-lactamases; Carbapenem resistance; Co-morbidities; Co-infection; Extended spectrum beta lactamase		Introduction: Multidrug Resistant (MDR) Escherichia coil isolates causing Urinary Tract Infections (UTIs), capable of producing Extended Spectrum Beta Lactamase (ESBL), AmpC beta lactamase and resistance to carbapenems pose serious challenges to the clinicians causing worse clinical scenarios. The detection of these isolates has prime importance in infection control and improving therapeutic mana…	2021
Fernández-Verdugo, A; Forcelledo, L; Rodríguez-Lozano, J; Rodríguez-Lucas, C; Barreiro-Hurlé, L; Canut, A; de la Iglesia, P; Escudero, D; Calvo, J; Boga, JA; Margolles, M; Rodicio, MR; Fernández, J	Prospective multicentre study of rectal carriage of multidrug-resistant Enterobacteriaceae among health-care workers in Spain	CLINICAL MICROBIOLOGY AND INFECTION	Carbapenemases; Colistin; Extended-spectrum beta-lactamases; Health-care workers; Hospital; Multidrug-resistant bacteria	LACTAMASE-PRODUCING ENTEROBACTERIACEAE; FECAL CARRIAGE; COLONIZATION; PREVALENCE	Objectives: To investigate the rectal carriage of multidrug-resistant Enterobacteriaceae (colistin-resistant, extended-spectrum beta-lactamase (ESBL) -producers and/or carbapenemase-producers) among healthcare workers (HCWs) from six Spanish hospitals. Methods: Rectal swabs from 258 HCWs, employed in intensive care units, haematology wards and clinical microbiology laboratories from six hospitals…	2020
Balkan, ÇE; Bozkurt, HB	Pediatric Blood Culture Resistance Rates from A Single Centre Hospital; How Innocent Are Coagulase-Negative Staphylococci?	JOURNAL OF PEDIATRIC INFECTION	Pediatric blood culture; resistance profile; coagulase-negative staphylococci	CONTAMINATION; MICROBIOLOGY; POSITIVITY; TIME	Objective: Pediatric blood culture bacteria profile and antibiotic susceptibilities vary for each hospital. In this study, it was aimed to determine the bacterial profile in blood cultures from the pediatric age group and study antibiotic susceptibility. In this context, we want to shed light on rational antibiotic use by determining antibiotic resistance rates in pediatric blood cultures and to …	2020
Rohde, AM; Zweigner, J; Wiese-Posselt, M; Schwab, F; Behnke, M; Kola, A; Schröder, W; Peter, S; Tacconelli, E; Wille, T; Feihl, S; Querbach, C; Gebhardt, F; Gölz, H; Schneider, C; Mischnik, A; Vehreschild, MJGT; Seifert, H; Kern, WV; Gastmeier, P; Hamprecht, A	Prevalence of third-generation cephalosporin-resistant Enterobacterales colonization on hospital admission and ESBL genotype-specific risk factors: a cross-sectional study in six German university hospitals	JOURNAL OF ANTIMICROBIAL CHEMOTHERAPY		SEQUENCE TYPE 131; LACTAMASE-PRODUCING ENTEROBACTERIACEAE; (ESBL)-PRODUCING ESCHERICHIA-COLI; INFECTION; TRAVELERS; C1-M27; CLADE	Objectives: To assess the admission prevalence of third-generation cephalosporin-resistant Enterobacterales (3GCREB) and to assess whether risk factors vary by beta-lactamase genotype. Methods:Adult patients were recruited within 72h of admission to general wards of six unversity hospitals in 2014 and 2015. Rectal swabs were screened for 3GCREB and isolates were analysed phenotypically and genoty…	2020
Wu, B; Qi, CH; Wang, LX; Yang, WH; Zhou, DS; Wang, M; Dong, YX; Weng, HY; Li, CM; Hou, XH; Long, XR; Wang, HR; Chai, TJ	Detection of microbial aerosols in hospital wards and molecular identification and dissemination of drug resistance of Escherichia coli	ENVIRONMENT INTERNATIONAL	Microbial aerosol; Escherichia coli; PFGE; Drug-resistant genes; Public health; Environmental biological pollution	FIELD GEL-ELECTROPHORESIS; INDOOR AIR-QUALITY; ANTIBIOTIC-RESISTANCE; BACTERIA; GENES; VIRULENCE; STRAINS; CHICKEN; RISK; CARE	Antibiotic-resistant bacteria (ARB) present a global public health problem. Microorganisms are the main cause of hospital-acquired infections, and the biological contamination of hospital environments can cause the outbreak of a series of infectious diseases. Therefore, it is very important to understand the spread of antibiotic-resistant bacteria in hospital environments. This study examines the…	2020
Xu, LL; Zeng, ZR; Ding, YH; Song, M; Yang, K; Liu, JB	Distribution and Antimicrobial Susceptibility of Gram-Positive and Gram-Negative Pathogens Isolated from Patients Hospitalized in a Tertiary Teaching Hospital in Southwestern China	JUNDISHAPUR JOURNAL OF MICROBIOLOGY	Antimicrobial Resistance; Intensive Care Unit; Gram-Positive Bacteria; Gram-Negative Bacteria		Background: Bacteria are the most common causes of clinical infectious diseases. The distribution and antimicrobial resistance (AMR) rates of bacteria provide important guidelines for clinical antibacterial treatment; however, the information in this region is still missing. Objectives: This study aimed to evaluate the changes in the distribution and AMR rates of clinical isolates from inpatients…	2020
Nakai, H	Initiatives to Combat Infectious Diseases through Regional Cooperation	YAKUGAKU ZASSHI-JOURNAL OF THE PHARMACEUTICAL SOCIETY OF JAPAN	antimicrobial stewardship team; infection control team; regional cooperation		The rate of detection of various resistant bacteria has recently increased, though the development of antimicrobial agents has been delayed. In the hospital setting, an antimicrobial stewardship team (AST) works to assure that resistant bacteria do not appear, while an infection control team (ICT) works to assure these resistant bacteria do not spread. Additionally, ICT and AST work together on t…	2020
Bauer, A; Grünewald, M; Eberhardt, H; Schulz, R; Martus, P; Brüggenjürgen, B; Joos, S; Sturm, H	Ambulatory screening and decontamination to prevent Staphylococcus aureus complications in patients undergoing elective surgery (STAUfrei): study protocol for a controlled intervention study	BMC INFECTIOUS DISEASES	Staphylococcus aureus; Decontamination; Prevention; Surgical site infection; MRSA; MSSA; Intersectoral care	SURGICAL SITE INFECTIONS; DECOLONIZATION; MRSA; RISK; EPIDEMIOLOGY; PREVALENCE; ADMISSION; STRATEGY	BackgroundSurgical site infections (SSI) are the most common health care associated infections in German acute hospitals and can result in prolonged hospital stays, increased use of antibiotics and utilisation of care. Staphylococcus aureus bacteria (methicillin-resistant S Aureus (MRSA) and methicillin-susceptible S Aureus (MSSA)) are amongst the most prominent causes of SSI. While up to 90% of …	2020
Zhou, CC; Jiang, MJ; Du, J; Bai, HT; Shan, GG; Kwok, RTK; Chau, JHC; Zhang, J; Lam, JWY; Huang, P; Tang, B	One stone, three birds: one AIEgen with three colors for fast differentiation of three pathogens	CHEMICAL SCIENCE		AGGREGATION-INDUCED EMISSION; CRITICALLY-ILL PATIENTS; BACTERIA; INFECTIONS; PROBE; MICROBIOLOGY; FLUORESCENCE; BIOPROBES; DIAGNOSIS; THERAPY	Visually identifying pathogens favors rapid diagnosis at the point-of-care testing level. Here, we developed a microenvironment-sensitive aggregation-induced emission luminogen (AIEgen), namely IQ-Cm, for achieving fast discrimination of Gram-negative bacteria, Gram-positive bacteria and fungi by the naked-eye. With a twisted donor-acceptor and multi-rotor structure, IQ-Cm shows twisted intramole…	2020
McEachern, F; Harvey, E; Merle, G	Emerging Technologies for the Electrochemical Detection of Bacteria	BIOTECHNOLOGY JOURNAL	biosensors; conductive materials; electrochemistry; gram-negative bacteria; Pseudomonas aeruginosa; screen-printed electrodes	CARBON ULTRAMICROELECTRODE ARRAYS; RESISTANT PSEUDOMONAS-AERUGINOSA; INFECTIOUS-DISEASES SOCIETY; MALDI-TOF MS; NOSOCOMIAL INFECTIONS; RAPID IDENTIFICATION; PYOCYANIN PRODUCTION; MASS-SPECTROMETRY; ELECTRON-TRANSFER; DIAGNOSIS	Infections are a huge economic liability to the health care system, although real-time detection can allow early treatment protocols to avoid some of this cost and patient morbidity and mortality.Pseudomonas aeruginosa(PA) is a drug-resistant gram-negative bacterium found ubiquitously in clinical settings, accounting for up to 27% of hospital acquired infections. PA secretes a vast array of molec…	2020
Liu, D; Zhang, J; Wu, B; Liu, F; Ye, SG; Wang, HM; Lv, J; Weng, X; Chen, Y; Han, WL; Chen, JY	Impact of donor lung colonized bacteria detected by next-generation sequencing on early post-transplant outcomes in lung transplant recipients	BMC INFECTIOUS DISEASES	Next-generation sequencing; Donor lung; Lung transplantation; Colonized bacteria	PNEUMONIA REQUIRING HOSPITALIZATION; ORGANISMS	BackgroundThe effect of donor lung colonized bacteria on the prognosis of lung transplantation is not clear. We used the technique of next-generation sequencing (NGS) to detect the colonized bacteria from the lower respiratory tract and analyzed whether the colonized bacteria of donor lung could affect the outcomes of lung transplantation.MethodsSeventeen patients who underwent lung transplantati…	2020
Pusterla, N; Rice, M; Henry, T; Barnum, S; James, K	Investigation of the Shedding of Selected Respiratory Pathogens in Healthy Horses Presented for Routine Dental Care	JOURNAL OF VETERINARY DENTISTRY	horse; silent shedder; respiratory viruses; respiratory bacteria; routine dental care	RESISTANT STAPHYLOCOCCUS-AUREUS; EHV-1; EPIDEMIOLOGY; PREVALENCE; INFECTION; DISEASE; BLOOD	The main objective of the study was to determine the frequency of detection of selected infectious respiratory viruses and bacteria in healthy horses presented over a 12-month period for routine dental care at 2 veterinary hospitals. Nasal secretions were collected from 579 horses and tested for equine herpesviruses (EHV-1, EHV-2, EHV-4, EHV-5), equine influenza virus (EIV), equine rhinitis A and…	2020
Matsumura, M; Shigeishi, H; Su, CY; Nishimura, R; Ohta, K; Sugiyama, M	High Rate of Oral Candida Detection in Dependent Japanese Older People	GERIATRICS	Candida albicans; Candida glabrata; Candida tropicalis; dependent older people; oral moisture; denture	PERIODONTAL-DISEASE; ALBICANS; HEALTH; GLABRATA; QUALITY; IMPACT	The aim of this study was to clarify the association between oral Candida detection and the dependency status of older people. This study included 31 older people aged >= 70 years who had a certified need for long-term care or support and received care in a local day care center; it also included 27 independent older patients aged >= 70 years who visited Hiroshima University Hospital. Oral Candid…	2020
Reischl, AT; Schreiner, D; Poplawska, K; Kidszun, A; Zepp, F; Gröndahl, B; Gehring, S	The clinical impact of PCR-based point-of-care diagnostic in respiratory tract infections in children	JOURNAL OF CLINICAL LABORATORY ANALYSIS	acute respiratory tract infections; antibiotic treatment; Biofire (R) FilmArray (R); multiplex RT-PCR; point-of-care-testing	VIRAL-INFECTIONS; ANTIBIOTIC USE; VIRUSES; ADULTS	Background Children are commonly affected by respiratory tract infections. Based on clinical symptoms, laboratory evaluation, and imaging, the causative pathogen often cannot be delineated. Point-of-care-testing systems that provide an opportunity for fast detection of common viruses and some bacteria can therefore influence treatment's options. We aimed to examine whether the Biofire (R) FilmArr…	2020
Toosky, MN; Grunwald, JT; Pala, D; Shen, B; Zhao, WA; D'Agostini, C; Coghe, F; Angioni, G; Motolese, G; Abram, TJ; Nicolai, E	A rapid, point-of-care antibiotic susceptibility test for urinary tract infections	JOURNAL OF MEDICAL MICROBIOLOGY	UTI; antimicrobial resistance; AST; cell counting; point of care; diagnostics	SYSTEM	Introduction. The alarming rise in urinary tract infection (UTI) antimicrobial resistance has resulted from a combination of high prevalence, low specificity and the lack of a rapid, point-of-care (POC) antibiotic susceptibility test (AST), which has led to the overuse/inappropriate use of antibiotics. Aim. This study aimed to evaluate the performance of a rapid POC phenotypic AST device in repor…	2020
Alasehir, EA; Ipek, BÖ; Thomas, DT; Sitar, ME; Ercan, TE	Ralstonia insidiosa Neonatal Sepsis: A Case Report and Review of the Literature	JOURNAL OF PEDIATRIC INFECTIOUS DISEASES	Ralstonia insidiosa; sepsis; neonate	DESORPTION IONIZATION-TIME; PICKETTII; OUTBREAK; IDENTIFICATION; MANNITOLILYTICA; INFECTION; BACTERIA	Introduction Ralstonia spp . are nonfermenting gram-negative bacteria that have recently emerged as opportunistic pathogens. Previously, two case series of infection associated with Ralstonia insidiosa have been published. In this case report, R. insidiosa infection of a neonate in the neonatal intensive care unit (NICU) is presented. Case Presentation A term male infant developed respiratory dis…	2020
Saipriya, K; Swathi, CH; Ratnakar, KS; Sritharan, V	Quorum-sensing system in Acinetobacter baumannii: a potential target for new drug development	JOURNAL OF APPLIED MICROBIOLOGY	Acinetobacter baumannii; acyl homoserine lactones; biofilm; quorum quenching; quorum sensing	ACYL-HOMOSERINE-LACTONE; BIOFILM FORMATION; SIGNAL MOLECULES; PSEUDOMONAS-AERUGINOSA; AHL-PRODUCTION; IDENTIFICATION; RESISTANCE; VIRULENCE; INHIBITORS; BACTERIA	Acinetobacter baumannii causes several nosocomial infections and poses major threat when it is multidrug resistant. Even pan drug-resistant strains have been reported in some countries. The intensive care unit (ICU) mortality rate ranged from 45.6% to 60.9% and it is as high as 84.3% when ventilator-associated pneumonia was caused by XDR (extensively drug resistant) A. baumannii. Acinetobacter ba…	2020
Abramowicz, L; Gerard, M; Martiny, D; Delforge, M; De Wit, S; Konopnicki, D	Infections due to carbapenemase-producing bacteria, clinical burden, and impact of screening strategies on outcome	MEDECINE ET MALADIES INFECTIEUSES	Enterobacteriaceae; Carbapenem resistance; Carbapenemase-producing bacteria; Rectal screening; Adequate antibiotic therapy	KLEBSIELLA-PNEUMONIAE; RESISTANT ENTEROBACTERIACEAE; EPIDEMIOLOGY; COLONIZATION; SPREAD	Objectives. - To characterize the risk factors, impact of screening, and clinical burden of colonization and/or infection by carbapenemase-producing bacteria (CPB) in hospitalized patients. Method. - Retrospective study in a tertiary care hospital between 2008 and 2016. Results. - Among 88 included patients, 41% were colonized, 59% developed an infection, and 69% of all cases were hospital-acquir…	2020
Roushani, M; Sarabaegi, M; Rostamzad, A	Novel electrochemical sensor based on polydopamine molecularly imprinted polymer for sensitive and selective detection of Acinetobacter baumannii	JOURNAL OF THE IRANIAN CHEMICAL SOCIETY	Impedimetric detection; Molecularly imprinted polymer; Polydopamine; Acinetobacter baumannii	BROAD-SPECTRUM; RESISTANCE	Acinetobacter baumannii (A. baumannii) which is one of the most problematic causative agents of nosocomial infections, worldwide, can severely cause morbidity and mortality within the healthcare community and present a particular threat to intensive care unit patients. The infection caused by these bacteria strains is a major cause for concern among healthcare professionals and is prompting chang…	2020
Crémet, L; Gaborit, B; Bouras, M; Drumel, T; Guillotin, F; Poulain, C; Persyn, E; Lakhal, K; Rozec, B; Vibet, MA; Roquilly, A; Gibaud, S	Evaluation of the FilmArray® Pneumonia Plus Panel for Rapid Diagnosis of Hospital-Acquired Pneumonia in Intensive Care Unit Patients	FRONTIERS IN MICROBIOLOGY	multiplex syndromic testing; hospital-acquired pneumonia; rapid diagnosis; coinfection; antibiotic resistance	VENTILATOR-ASSOCIATED PNEUMONIA; INFECTIOUS-DISEASES SOCIETY; SPECIMENS; PATHOGENS; MEDIA	The FilmArray (R) PneumoniaplusPanel (FAPP) is a new multiplex molecular test for hospital-acquired pneumonia (HAP), which can rapidly detect 18 bacteria, 9 viruses, and 7 resistance genes. We aimed to compare the diagnosis performance of FAPP with conventional testing in 100 intensive care unit (ICU) patients who required mechanical ventilation, with clinically suspected HAP. A total of 237 samp…	2020
Yadav, SK; Bhujel, R; Hamal, P; Mishra, SK; Sharma, S; Sherchand, JB	Burden of Multidrug-Resistant Acinetobacter baumannii Infection in Hospitalized Patients in a Tertiary Care Hospital of Nepal	INFECTION AND DRUG RESISTANCE	Acinetobacter baumannii; hospitalized patients; multidrug resistant; metallo-beta-lactamase	VENTILATOR-ASSOCIATED PNEUMONIA; ANTIMICROBIAL RESISTANCE; BETA-LACTAMASES; CARBAPENEMASES; EPIDEMIOLOGY; EMERGENCE; DISSEMINATION; OUTBREAK; SPP.	Introduction: Acinetobacter baumannii has emerged as a significant multidrug-resistant (MDR) nosocomial pathogen worldwide and is responsible for various healthcare-associated infections. The MDR strains have been reported increasingly during the last decades in hospitalized patients. They have developed resistance to most of the available antibiotics and are known to produce various acquired bet…	2020
Di Maio, S; Messina, G; Burgassi, S; Cardaci, R; Amodeo, D; De Marco, F; Serafini, A; Lenzi, D	Rapid detection of Legionella spp in water samples by ScanVIT method: comparison of acid vs heat treatment	ANNALI DI IGIENE MEDICINA PREVENTIVA E DI COMUNITA	ScanVIT-Legionella; Legionella infection; Legionella non-pneumophila; water; standard culture method; fluorescent probes	HOSPITAL WATER; CULTURE; SCANVIT-LEGIONELLA(TM); IDENTIFICATION; PNEUMOPHILA; SYSTEMS; ASSAY; SPP.; PCR	Background. A rapid detection of Legionella bacteria in water samples is crucial to minimize the risk of acquiring infections, especially in health care facilities. Different detection methods and different decontamination procedures have been reported to affect the recovery of Legionella spp. Our goal was to test the recovery of Legionella pneumophila and Legionella non-pneumophila species using…	2020
Fan, N; Hu, Y; Shen, H; Liu, SJ; Zhao, G; Sun, LJ; Li, CY; Zhao, X; Li, YN; Wang, JH; Cui, YF	Compositional and drug-resistance profiling of pathogens in patients with severe acute pancreatitis: a retrospective study	BMC GASTROENTEROLOGY	Severe acute pancreatitis; Multi-drug resistant bacteria; Bacteria spectrum; Antibiotic resistance; Risk factors	PSEUDOMONAS-AERUGINOSA; PROPHYLACTIC ANTIBIOTICS; RISK-FACTORS; INFECTIOUS COMPLICATIONS; NECROTIZING PANCREATITIS; MANAGEMENT; BACTEREMIA; MORTALITY; RESPONSES; NECROSIS	Background Infection is one of the important causes of death in patients with severe acute pancreatitis (SAP), but the bacterial spectrum and antibiotic resistance are constantly changing. Making good use of antibiotics and controlling multi-drug-resistant (MDR) bacterial infections are of vital importance in improving the cure rate of SAP. We conducted a retrospective study in the hope of provid…	2020
Huang, J; Cui, C; Zhou, SL; Chen, M; Wu, H; Jin, RH; Chen, XY	Impact of multicenter unified enhanced environmental cleaning and disinfection measures on nosocomial infections among patients in intensive care units	JOURNAL OF INTERNATIONAL MEDICAL RESEARCH	Multi-center; environmental cleaning; disinfection measure; nosocomial infection; intensive care unit; mass spectrometry; multidrug-resistant bacteria; contamination	RESISTANT ACINETOBACTER-BAUMANNII; MALDI-TOF-MS; ANTIMICROBIAL RESISTANCE; CLOSTRIDIUM-DIFFICILE; COLONIZATION; SURFACES; TIME; CONTAMINATION; INTERVENTION; PREVENTION	Objectives Most Chinese hospitals have customized environmental cleaning policies and systems, with limited data availability based on evidence-based medicine. This study investigated the relationship between multidrug-resistant organism (MDRO) colonization in intensive care unit (ICU) patients and ICU surface bacterial contamination status. Methods This cross-sectional study comprised MDRO scree…	2020
Gao, XY; Dai, YH; Fan, DZ; Xie, XY; Yang, GD; Xiao, X; Gao, PM	The association between the microbes in the tracheobronchial aspirate fluid and bronchopulmonary dysplasia in preterm infants	PEDIATRICS AND NEONATOLOGY	Bronchopulmonary dysplasia; Gram-negative bacteria; Preterm; Tracheobronchial aspirate fluid	CHRONIC LUNG-DISEASE; INTENSIVE-CARE-UNIT; CLINICAL CHARACTERISTICS; MECHANICAL VENTILATION; PREMATURE-INFANTS; COLONIZATION; INFECTIONS; SEPSIS	Objective: The study aimed to evaluate the association between microbes in the lower respiratory tract (LRT) and the srisk for severe bronchopulmonary dysplasia (sBPD) in premature infants. Methods: We conducted a retrospective, single-center study of preterm infants who were admitted to the neonatal intensive care unit (NICU) of Southern Medical University Affiliated Maternal & Child Health Hosp…	2020
Bilal, H; Hameed, F; Khan, MA; Khan, S; Yang, XY; Rehman, TU	Detection of mcr-1 Gene in Extended-Spectrum β-Lactamase-Producing Klebsiella pneumoniae From Human Urine Samples in Pakistan	JUNDISHAPUR JOURNAL OF MICROBIOLOGY	Extended-Spectrum beta-Lactamase; Colistin Resistance; mcr-1; Klebsiella pneumoniae	ESCHERICHIA-COLI; ANTIBIOTIC-RESISTANCE; DRINKING-WATER; EPIDEMIOLOGY; FOOD	Background: Colistin is the last-resort antibiotic available to date against Multiple-drug-resistant (MDR) bacteria, particularly carbapenem-resistant Enterobacteriaceae (CRE) harboring the NDM1 and KPC2 genes. Objectives: The current study was designed to investigate extended-spectrum beta-lactamase (ESBL) production, colistin resistance, and the presence of mcr-1 in Klebsiella pneumoniae isolat…	2020
Silago, V; Kovacs, D; Msanga, DR; Seni, J; Matthews, L; Oravcová, K; Zadoks, RN; Lupindu, AM; Hoza, AS; Mshana, SE	Bacteremia in critical care units at Bugando Medical Centre, Mwanza, Tanzania: the role of colonization and contaminated cots and mothers' hands in cross-transmission of multidrug resistant Gram-negative bacteria	ANTIMICROBIAL RESISTANCE AND INFECTION CONTROL	Antimicrobial resistance; Hand hygiene; Hospital surfaces contamination; Multidrug resistant bacteria; Bacteremia	ACINETOBACTER-BAUMANNII; RISK-FACTORS; PREVALENCE; WORKERS	Background Multidrug resistance (MDR) is a major clinical problem in tertiary hospitals in Tanzania and jeopardizes the life of neonates in critical care units (CCUs). To better understand methods for prevention of MDR infections, this study aimed to determine, among other factors, the role of MDR-Gram-negative bacteria (GNB) contaminating neonatal cots and hands of mothers as possible role in tr…	2020
Lao, MX; Zhang, KC; Zhang, M; Wang, Q; Li, J; Su, L; Ding, ML; He, W; Gong, YY	Clinical Features and Co-Infections in Invasive Pulmonary Aspergillosis in Elderly Patients	INFECTION AND DRUG RESISTANCE	pulmonary aspergillosis; elderly; co-infection; mortality	FUNGAL-INFECTIONS; MORTALITY; OBESITY; EPIDEMIOLOGY; ASSOCIATION; IMMUNITY	Introduction: Invasive pulmonary aspergillosis (IPA) is a potentially lethal opportunistic infection. Old age is one of the important risk factors of IPA. However, data regarding the clinical characteristics and prognostic factors of elderly patients with IPA are limited, with data regarding co-infection of other bacteria or fungi even scarcer. Methods: We performed a retrospective study of elder…	2020
Sammer-ul Hassan; Zhang, XL	Microfluidics as an Emerging Platform for Tackling Antimicrobial Resistance (AMR): A Review	CURRENT ANALYTICAL CHEMISTRY	Antibiotic; antimicrobial resistance (AMR); Antimicrobial susceptibility testing (AST); capillary flow; colorimetry; lab-on-a-chip; microfluidics; Minimum inhibitory concentration (MIC); Point-of-care	ANTIBIOTIC SUSCEPTIBILITY; ELECTROCHEMICAL SENSOR; RAPID IDENTIFICATION; ANALYTICAL DEVICE; BACTERIAL-GROWTH; PAPER; TIME; SALMONELLA	Background: Antimicrobial resistance (AMR) occurs when microbes become resistant to antibiotics causing complications and limited treatment options. AMR is more significant where antibiotics use is excessive or abusive and the strains of bacteria become resistant to antibiotic treatments. Current technologies for bacteria and its resistant strains identification and antimicrobial susceptibility t…	2020
Fraser, H; Gallacher, D; Achana, F; Court, R; Taylor-Phillips, S; Nduka, C; Stinton, C; Willans, R; Gill, P; Mistry, H	Rapid antigen detection and molecular tests for group A streptococcal infections for acute sore throat: systematic reviews and economic evaluation	HEALTH TECHNOLOGY ASSESSMENT		COST-EFFECTIVENESS ANALYSIS; ACUTE PHARYNGITIS; DIAGNOSIS; MANAGEMENT; CULTURE; STREP; COMMUNITY; CHILDREN; ADULTS; GUIDELINES	Background: Sore throat is a common condition caused by an infection of the airway. Most cases are of a viral nature; however, a number of these infections may be caused by the group A Streptococcus bacterium. Most viral and bacterial sore throat infections resolve spontaneously within a few weeks. Point-of-care testing in primary care has been recognised as an emerging technology for aiding targ…	2020
Bassetti, M; Russo, A; Righi, E; Dolso, E; Merelli, M; D'Aurizio, F; Sartor, A; Curcio, F	Role of procalcitonin in predicting etiology in bacteremic patients: Report from a large single-center experience	JOURNAL OF INFECTION AND PUBLIC HEALTH	Procalcitonin; C-reactive protein; Bacteremia; Gram-negative; Enterobacteriaceae	BLOOD-STREAM INFECTIONS; C-REACTIVE PROTEIN; BACTERIAL-INFECTION; SERUM PROCALCITONIN; SEPSIS	Background: Procalcitonin (PCT) is routinely used for an early recognition of severe infections and for promoting appropriate use of antibiotics. However, limited data correlating values of PCT with etiology of infection has been reported. Methods: During 2016, all positive blood cultures (BC) were retrospectively extracted in a 1100-beds Italian tertiary-care hospital. PCT and C-reactive protein…	2020
Aghamohammad, S; Badmasti, F; Solgi, H; Aminzadeh, Z; Khodabandelo, Z; Shahcheraghi, F	First Report of Extended-Spectrum Betalactamase-Producing Klebsiella pneumoniae Among Fecal Carriage in Iran: High Diversity of Clonal Relatedness and Virulence Factor Profiles	MICROBIAL DRUG RESISTANCE	fecal carriage; Klebsiella pneumoniae; clonal relatedness	ESCHERICHIA-COLI; MOLECULAR CHARACTERIZATION; INTERNATIONAL CLONES; ENTEROBACTERIACEAE; STRAINS; CARBAPENEMASE; PLASMIDS; COLONIZATION; EPIDEMIOLOGY; EMERGENCE	Increasing rate of silent intestinal carriers with extended-spectrum betalactamase (ESBL)-producing Klebsiella pneumonia (ESBL-KP) has given rise to a serious healthcare problem in clinical settings. Various epidemiological studies are being conducted to determine clonal relatedness among carriers. In this study, we investigated the intestinal carriage of ESBL-KP and clonal relatedness among ESBL…	2020
Gautam, S; Bhattarai, NR; Rai, K; Poudyal, A; Khanal, B	Detection of bla NDM-1 Encoding Imepenemase among the Imipenem-Resistant Gram-Negative Bacilli Isolated from Various Clinical Samples at a Tertiary Care Hospital of Eastern Nepal: A Descriptive Cross-Sectional Study	INTERNATIONAL JOURNAL OF MICROBIOLOGY		BETA-LACTAMASE; MOLECULAR-DETECTION	Background. Carbapenem resistance among Gram-negative isolates caused by the production of the metallo-beta-lactamase (MBL) enzyme is being increasingly reported worldwide. One of the newly emerged metallo-beta-lactamases is New Delhi metallo-beta-lactamase. Data regarding its occurrence in hospital setting and percentage prevalence among different Gram-negative bacterial isolates are lacking in …	2020
Mohagheghzadeh, N; Hashemizadeh, Z; Khashei, R; Kholdi, S; Mohebi, S; Motamedifar, M	High occurrence of antibiotic resistance and biofilm-formation among Stenotrophomonas maltophilia isolated from a tertiary hospital in Southwest of Iran	GENE REPORTS	Stenotrophomonas maltophilia; Antibiotic resistance; Biofilm formation; ERIC-PCR		Introduction: The emergence of Stenotrophomonas maltophilia (S. maltophilia) causes of morbidity and mortality infections associated with hospitalized or compromised patients. The aim of this study was to evaluate the antimicrobial resistance patterns, biofilm formation ability as well as the clonal and genetic diversity among clinical isolates of S. maltophilia. Materials and methods: During 8-m…	2020
Wen, ZW; Shang, YP; Xu, GJ; Pu, ZY; Lin, ZW; Bai, B; Chen, Z; Zheng, JX; Deng, QW; Yu, ZJ	Mechanism of Eravacycline Resistance in Clinical Enterococcus faecalis Isolates From China	FRONTIERS IN MICROBIOLOGY	Eravacycline; Enterococcus faecalis; heteroresistance; tetracycline resistance genes; resistance mechanism	RIBOSOMAL S10 PROTEIN; IN-VITRO ACTIVITY; TETRACYCLINE; TIGECYCLINE; FLUOROCYCLINE; ENTEROBACTERIACEAE; ANTIBIOTICS; INFECTIONS; MUTATIONS; TP-434	Opportunistic infections caused by multidrug-resistant Enterococcus faecalis strains are a significant clinical challenge. Eravacycline (Erava) is a synthetic fluorocycline structurally similar to tigecycline (Tige) that exhibits robust antimicrobial activity against Gram-positive bacteria. This study investigated the in vitro antimicrobial activity and heteroresistance risk of Eravacycline (Erav…	2020
Sarkar, S; Dutta, S; Namhata, A; Banerjee, C; Sengupta, M; Sengupta, M	Beta-lactamase Profile and Biofilm Production of Pseudomonas aeruginosa Isolated from a Tertiary Care Hospital in Kolkata, India	JOURNAL OF CLINICAL AND DIAGNOSTIC RESEARCH	Extended spectrum beta-lactamases; Exopolysaccharide matrix; Gram negative bacteria; Metallo-beta-lactamases	MULTIDRUG-RESISTANT; PREVALENCE; COMBINATION; INFECTIONS; MECHANISMS	Introduction: Nosocomial infections caused by Multidrug Resistant (MDR) Pseudomonas aeruginosa (P. aeruginosa) have become a major clinical and public health concern. Moreover, the biofilm production protects the bacteria from antibiotics and thereby makes the drugs ineffective. Aim: To find out the beta-lactamases profile of antimicrobial resistance and biofilm production of P. aeruginosa isolat…	2020
Alnajjar, MS; Aldeyab, MA; Scott, MG; Kearney, MP; Fleming, G; Glimore, F; Farren, D; McElnay, JC	Influence of primary care antibiotic prescribing on incidence rates of multidrug-resistant Gram-negative bacteria in hospitalised patients	INFECTION	Primary care; Antibiotic prescribing; Multidrug-resistant Gram-negative bacteria (MRGN); Hospitalised patients; Antibiotic resistance; Pharmacoepidemiology	LACTAMASE-PRODUCING ENTEROBACTERIACEAE; ESCHERICHIA-COLI INFECTION; RISK-FACTORS; STAPHYLOCOCCUS-AUREUS; COMMUNITY	Purpose Use of antibiotics can give rise to the selection of resistant bacteria. It remains unclear whether antibiotic use in primary care can influence bacterial resistance incidence in patients when hospitalised. The aim of this study is to explore the impact of prior community antibiotic usage on hospital-detected multidrug-resistant Gram-negative (MRGN) incidence rate. Methods This pharmacoep…	2019
Xu, Y; Ding, HZ; Wufeng	DISTRIBUTION AND GENE DEFECTION OF DRUG-RESISTANT BACTERIA IN THE AIR OF HOSPITAL	ACTA MEDICA MEDITERRANEA	Resistance genes; drug-resistant bacteria; hospital air monitor	ANTIBIOTIC-RESISTANCE; IDENTIFICATION; INFECTIONS; PATHOGENS; SYSTEM	Objective: At the environmental level, we should monitor the resistance genes in the air to control the occurrence of nosocomial infections. 2. The distribution of pathogenic microbes in different sections and seasons is different, and the resistance genes of resistant bacteria in different sections and seasons are detected to know whether the resistance genes in each department are homologous, s…	2019
Ling, S; Hui, L	Evaluation of the complexity of indoor air in hospital wards based on PM2.5, real-time PCR, adenosine triphosphate bioluminescence assay, microbial culture and mass spectrometry	BMC INFECTIOUS DISEASES	PM2.5; Real-time PCR; ATP bioluminescence assay; Passive sedimentation; Microbial ecology; MALDI-TOF MS	STAPHYLOCOCCUS-HAEMOLYTICUS; KOCURIA ROSEA; PROFILES; EXPOSURE; FUNGI; MICROORGANISMS; ACQUISITION; ENVIRONMENT; RESISTANCE; INFECTION	Background: The aim of this study was to establish a set of assessment methods suitable for evaluating the complex indoor environment of hospital wards and to ascertain the composition of bacteria and microbial ecology of hospital wards. Methods: Colony-forming units (CFUs), PM2.5 detection, real-time PCR, and adenosine triphosphate (ATP) bioluminescence assay were employed to evaluate the comple…	2019
Dey, P; Fabri-Faja, N; Calvo-Lozano, O; Terborg, RA; Belushkin, A; Yesilkoy, F; Fàbrega, A; Ruiz-Rodriguez, JC; Ferrer, R; González-López, JJ; Estévez, MC; Altug, H; Pruneri, V; Lechuga, LM	Label-free Bacteria Quantification in Blood Plasma by a Bioprinted Microarray Based Interferometric Point-of-Care Device	ACS SENSORS	bacteria; sepsis; microarray; label-free detection; nanoplasmonics; plasma samples	SEVERE SEPSIS; SEPTIC SHOCK; INFECTIONS; COLI; BIOSENSORS; MORTALITY; DIAGNOSIS; THERAPY; DNA	Existing clinical methods for bacteria detection lack speed, sensitivity, and, importantly, point-of-care (PoC) applicability. Thus, finding ways to push the sensitivity of clinical PoC biosensing technologies is crucial. Here we report a portable PoC device based on lens-free interferometric microscopy (LIM). The device employs high performance nanoplasmonics and custom bioprinted microarrays an…	2019
Rösner, S; Kamalanabhaiah, S; Küsters, U; Kolbert, M; Pfennigwerth, N; Mack, D	Evaluation of a novel immunochromatographic lateral flow assay for rapid detection of OXA-48, NDM, KPC and VIM carbapenemases in multidrug-resistant Enterobacteriaceae	JOURNAL OF MEDICAL MICROBIOLOGY	carbapenemase-producing Enterobacteriaceae; carbapenemase detection; immunochromatographic carbapenemase detection; multidrug-resistant Gram-negative bacteria		Purpose. The global spread and increasing clinical impact of carbapenemase-producing bacteria are alarming. Rapid diagnostic techniques for carbapenemase detection are of the utmost importance to prevent delays in efficient antibiotic therapy and the control of spread in hospitals. Recently, multiplex immunochromatographic lateral flow tests (ICTs) for the fast detection of carbapenemase-producer…	2019
Huang, L; Zhang, R; Hu, YY; Zhou, HW; Cao, JM; Lv, HY; Chen, S; Ding, SB; Chen, GX	Epidemiology and risk factors of methicillin-resistant Staphylococcus aureus and vancomycin-resistant enterococci infections in Zhejiang China from 2015 to 2017	ANTIMICROBIAL RESISTANCE AND INFECTION CONTROL	Epidemiology; Risk factor; Methicillin-resistant Staphylococcus aureus; Vancomycin-resistant enterococci	ANTIMICROBIAL RESISTANCE; CFR; SURVEILLANCE; FAECIUM; EMERGENCE; PLASMID; OPTRA	Background: Gram-positive bacteria are dangerous and challenging agents of infection due to their increasing resistance to antibiotics. We aim to analyse the epidemiology and risk factors of methicillin-resistant Staphylococcus aureus (MRSA) and vancomycin-resistant enterococci (VRE) in Zhejiang China. Methods: Gram-positive bacteria (including S. aureus, Enterococcus faecalis and Enterococcus fa…	2019
Hunter, R; Sohi, AN; Khatoon, Z; Berthiaume, VR; Alarcon, EI; Godin, M; Anis, H	Optofluidic label-free SERS platform for rapid bacteria detection in serum	SENSORS AND ACTUATORS B-CHEMICAL	Surface enhanced Raman scattering; Optofluidic; Label-free detection; Machine learning; Hospital acquired infection	ENHANCED RAMAN-SCATTERING; STAPHYLOCOCCUS-AUREUS; ESCHERICHIA-COLI; BIOSENSOR; NANOPARTICLES; CELLS	The prevalence of hospital acquired infections and antibiotic resistant pathogens necessitates the development of bacteria sensing systems that do not require sample amplification via conventional cell culturing, which can be prohibitively time-consuming. To meet this need, we designed an optofluidic Raman detection platform which utilized a microfluidic driven hollow-core photonic crystal fiber,…	2019
Gahlaut, SK; Kalyani, N; Sharan, C; Mishra, P; Singh, JP	Smartphone based dual mode in situ detection of viability of bacteria using Ag nanorods array	BIOSENSORS & BIOELECTRONICS	Antibiotic resistance; Live and dead bacteria; Silver nanorods; Hydrogen sulfide; Glancing angle deposition	HYDROGEN-SULFIDE; H2S; PROBE; GAS	The in-situ and rapid detection of live and dead bacteria is essential for human and environmental care. It has become one of the biggest needs in the biological and medical sciences to prevent infectious diseases, which usually occur in hospitals and field clinics. In the current scenario, antibiotic resistance is one of the severe public health problems, which requires a quick and efficient sol…	2019
Sundell, N; Andersson, LM; Brittain-Long, R; Sundvall, PD; Ålsio, A; Lindh, M; Gustavsson, L; Westin, J	PCR Detection of Respiratory Pathogens in Asymptomatic and Symptomatic Adults	JOURNAL OF CLINICAL MICROBIOLOGY	respiratory pathogens; respiratory viruses; virology	COMMUNITY-ACQUIRED PNEUMONIA; POLYMERASE-CHAIN-REACTION; REAL-TIME PCR; STREPTOCOCCUS-PNEUMONIAE; BACTERIAL PATHOGENS; TRACT INFECTIONS; CHILDREN; RHINOVIRUS; VIRUSES; PICORNAVIRUS	The frequency of viral respiratory pathogens in asymptomatic subjects is poorly defined. The aim of this study was to explore the prevalence of respiratory pathogens in the upper airways of asymptomatic adults, compared with a reference population of symptomatic patients sampled in the same centers during the same period. Nasopharyngeal (NP) swab samples were prospectively collected from adults w…	2019
Dou, MW; Macias, N; Shen, F; Bard, JD; Domínguez, DC; Li, XJ	Rapid and Accurate Diagnosis of the Respiratory Disease Pertussis on a Point-of-Care Biochip	ECLINICALMEDICINE	Pertussis diagnosis; Point-of-care detection; Microfluidic biochip; Whooping cough; Loop-mediated isothermal amplification (LAMP)	REAL-TIME PCR; BORDETELLA-PERTUSSIS	Background: Pertussis is a highly contagious respiratory disease caused by the bacterium Bordetella pertussis (B. pertussis). The infection is difficult to diagnose especially in underserved or resource-limited areas. We developed a low-cost and instrument-free diagnostic method for rapid and accurate detection of B. pertussis on a point-of-care (POC) testing device. Methods: We developed a paper…	2019
Prado-Vivar, MB; Ortiz, L; Reyes, J; Villacis, E; Fornasini, M; Baldeon, ME; Cardenas, PA	Molecular typing of a large nosocomial outbreak of KPC-producing bacteria in the biggest tertiary-care hospital of Quito, Ecuador	JOURNAL OF GLOBAL ANTIMICROBIAL RESISTANCE	Nosocomial infection; Carbapenemase; Klebsiella pneumoniae; KPC; Multilocus sequence typing	KLEBSIELLA-PNEUMONIAE CARBAPENEMASE-2; RESISTANT; INFECTIONS; ENTEROBACTERIACEAE; EVOLUTION; HEALTH; CLONE	Objectives: Klebsiella pneumoniae is an opportunistic pathogen associated with nosocomial infections worldwide. Isolates with a K. pneumoniae carbapenemase (KPC)-producing phenotype show reduced susceptibility to first-choice antibiotics. Between 2012-2013, the largest public tertiary-care hospital in Quito (Ecuador) reported an outbreak of KPC-producing bacteria with more than 800 cases. We deve…	2019
Jozpanahi, M; Rankuhi, AG; Sayari, S; Jalilvand, A	EVALUATION OF COUSTIN-RESISTANT GRAM-NEGATIVE BACTERIA IN INTENSIVE CARE UNIT PATIENTS	ACTA MEDICA MEDITERRANEA	Multidrug resistant; Colistin resistance; Intensive care unit; Gram-negative bacteria	COLISTIN-RESISTANT; ANTIMICROBIAL RESISTANCE; KLEBSIELLA-PNEUMONIAE; COMBINATION; INFECTIONS; COLONIZATION; MANAGEMENT	Introduction: The overuse as well as the misuse of antibiotics contributes to the emergence of multidrug-resistant Gram-negative organisms. The increasing multidrug resistance in Gram-negative bacteria, in particular Pseudomonas aeruginosa, Acinetobacter haumannii, and Klebsiella pneumoniae, poses a critical global problem. The availability of limited therapeutic options has forced infectious dis…	2019
Kun, J; Smieja, M; Xiong, B; Soleymani, L; Fang, QY	The Use of Motion Analysis as Particle Biomarkers in Lensless Optofluidic Projection Imaging for Point of Care Urine Analysis	SCIENTIFIC REPORTS		TRICHOMONAS-VAGINALIS; PLATFORM; MOTILITY; CELL	Urine testing is an essential clinical diagnostic tool. The presence of urine sediments, typically analyzed through microscopic urinalysis or cell culture, can be indicative of many diseases, including bacterial, parasitic, and yeast infections, as well as more serious conditions like bladder cancer. Current urine analysis diagnostic methods are usually centralized and limited by high cost, incon…	2019
Yao, H; Xu, D; Zhu, ZC; Wang, GY	Gestational diabetes mellitus increases the detection rate and the number of oral bacteria in pregnant women	MEDICINE	GDM; oral health condition; oral microbial imbalance; PSM	LOW-BIRTH-WEIGHT; PERIODONTAL-DISEASE; PRETERM BIRTH; HYPERGLYCEMIA; ASSOCIATION; DIAGNOSIS	In the present study, we aimed to investigate the association between gestational diabetes mellitus (GDM) and the oral microbial imbalance in the second trimester of pregnancy.Three hundred thirtyone women in the second trimester of pregnancy who underwent prenatal examinations at the Third Affiliated Hospital of Soochow University from February 2018 to August 2018 were included in this study. Pe…	2019
Shenoy, ES; Pierce, VM; Walters, MS; Moulton-Meissner, H; Lawsin, A; Lonsway, D; Shugart, A; McAllister, G; Halpin, AL; Zambrano-Gonzalez, A; Ryan, EE; Suslak, D; DeJesus, A; Barton, K; Madoff, LC; McHale, E; DeMaria, A; Hooper, DC	Transmission of Mobile Colistin Resistance (mcr-1) by Duodenoscope	CLINICAL INFECTIOUS DISEASES	duodenoscope; infection control; medical device safety; mobile colistin resistance; Klebsiella pneumoniae	ESCHERICHIA-COLI; CARBAPENEM-RESISTANT; GENE	Background. Clinicians increasingly utilize polymyxins for treatment of serious infections caused by multidrug-resistant gram-negative bacteria. Emergence of plasmid-mediated, mobile colistin resistance genes creates potential for rapid spread of polymyxin resistance. We investigated the possible transmission of Klebsiella pneumoniae carrying mcr-1 via duodenoscope and report the first documented…	2019
Sansot, M; Fradin, E; Chenouard, R; Kempf, M; Kouatchet, A; Lasocki, S; Lemarié, C; Eveillard, M; Pailhoriès, H	Performance of the extended use of the FilmArray® BCID panel kit for bronchoalveolar lavage analysis	MOLECULAR BIOLOGY REPORTS	Ventilator associated pneumonia; Multiplex PCR; Intensive care units; Nosocomial infection; Diagnosis	VENTILATOR-ASSOCIATED PNEUMONIA; BLOOD CULTURE IDENTIFICATION; PULMONARY INFECTION SCORE; ANTIMICROBIAL STEWARDSHIP; ECONOMIC-IMPACT; DIAGNOSIS; MORTALITY	Ventilator-associated pneumonia (VAP) are responsible for an increase in morbidity, mortality, and prolonged hospital stay. A multiplex PCR kit such as the FilmArray((R)) BCID panel could allow early adaptation of antimicrobial therapy, which is crucial for clinical outcomes. The purpose of this study was to test the performances of FilmArray((R)) BCID panel for the detection of bacteria producin…	2019
Zhong, LL; Zhou, Q; Tan, CY; Roberts, AP; Ahmed, MAE; Chen, GP; Dai, M; Yang, F; Xia, Y; Liao, K; Liang, YJ; Yang, YQ; Feng, SY; Zheng, XB; Tian, GB	Multiplex loop-mediated isothermal amplification (multi-LAMP) assay for rapid detection of mcr-I to mcr-5 in colistin-resistant bacteria	INFECTION AND DRUG RESISTANCE	mcr genes; colistin resistance; multi-LAMP; rapid detection; enzyme digestion	ESCHERICHIA-COLI; VISUAL DETECTION; DIRECT CLONING; GENE; DNA; IDENTIFICATION	Purpose: The discovery of the plasmid-mediated colistin resistance genes, mei-, revealed a mechanism of transmission of colistin resistance, which is a major, global public health concern especially among individuals infected with carbapenem-resistant Gram-negative bacteria. To monitor the spread and epidemiology of mcr genes, a convenient and reliable method to detect mcr genes in clinical isola…	2019
Dantas, LF; Dalmas, B; Andrade, RM; Hamacher, S; Bozza, FA	Predicting acquisition of carbapenem-resistant Gram-negative pathogens in intensive care units	JOURNAL OF HOSPITAL INFECTION	Carbapenem resistance; Multi-drug resistance; Gram-negative; Healthcare-associated infection; Predictive models; Intensive care units	RISK-FACTORS; PSEUDOMONAS-AERUGINOSA; NOSOCOMIAL COLONIZATION; ACINETOBACTER-BAUMANNII; INFECTIONS; PATIENT; PREVALENCE; MORTALITY; BACTERIA; OUTCOMES	Background: Infections by multidrug-resistant Gram-negative (MDRGN) bacteria are among the greatest contemporary health concerns, especially in intensive care units (ICUs), and may be associated with increased hospitalization time, morbidity, costs, and mortality. Aim: The study aimed to predict carbapenem-resistant MDRGN acquisition in ICUs, to determine its risk factors, and to assess the impac…	2019
Waseem, M; Sarwar, N; Sajjad, A; Jamil, R; Anwar, MJ	Isolation of Gram Positive and Gram Negative Bacteria from operation theaters of Tertiary Care Hospital and Molecular Detection of Staphylococcus Aureus Genes	PAKISTAN JOURNAL OF MEDICAL & HEALTH SCIENCES	Hospital Acquired Infection; Operation Theatre; Staphylococcus aureus		Aim: To identify the microorganisms in different operation theaters in tertiary care hospital and characterization of isolates on the basis of biochemical test and molecular level. Methodology: Microbial contamination of five different operation theaters were selected including General surgery (OT1), gynecology (OT2), urology (OT3), orthopedics (OT4) and cardiac (OT5). Air samples of five differe…	2019
Dembele, BPP; Kamigaki, T; Dapat, C; Tamaki, R; Saito, M; Saito, M; Okamoto, M; Igoy, MAU; Mercado, ES; Mondoy, M; Tallo, VL; Lupisan, SP; Egawa, S; Oshitani, H	Aetiology and risks factors associated with the fatal outcomes of childhood pneumonia among hospitalised children in the Philippines from 2008 to 2016: a case series study	BMJ OPEN		COMMUNITY-ACQUIRED PNEUMONIA; RESPIRATORY SYNCYTIAL VIRUS; ENTEROVIRUS D68; YOUNG-CHILDREN; DEVELOPING-COUNTRIES; GLOBAL BURDEN; ILL CHILDREN; SOLID-FUEL; INFECTIONS; MORTALITY	Objective Pneumonia remains the leading cause of hospitalisations and deaths among children aged < 5 years. Diverse respiratory pathogens cause acute respiratory infections, including pneumonia. Here, we analysed viral and bacterial pathogens and risk factors associated with death of hospitalised children. Design A 9-year case series study. Setting Two secondary-care hospitals, one tertiary-care …	2019
Asadian, M; Azimi, L; Alinejad, F; Ostadi, Y; Lari, AR	Molecular Characterization of Acinetobacter baumannii Isolated from Ventilator-Associated Pneumonia and Burn Wound Colonization by Random Amplified Polymorphic DNA Polymerase Chain Reaction and the Relationship between Antibiotic Susceptibility and Biofilm Production	ADVANCED BIOMEDICAL RESEARCH	Acinetobacter baumannii; extensively drug resistant; Oxa-23; random amplified polymorphic DNA polymerase chain reaction	PCR	Background: Multidrug-resistant Acinetobacter baumannii can cause complications in antibiotic therapy and increase the rate of morbidity and mortality in hospitalized patients. Patients with ventilator and burns are two specific groups at high risk for A. baumannii infections. This study aimed to determine antibiotic susceptibility patterns associated with biofilm production in A. baumannii and t…	2019
Alexandropoulou, I; Parasidis, T; Konstantinidis, T; Panopoulou, M; Constantinidis, TC	A Proactive Environmental Approach for Preventing Legionellosis in Infants: Water Sampling and Antibiotic Resistance Monitoring, a 3-Years Survey Program	HEALTHCARE	infant; Legionella spp; environmental monitoring; waterborne pathogens; antibiotic; e-test; water distribution system; health care facilities; public health	PNEUMOPHILA SEROGROUP 1; LEGIONNAIRES-DISEASE; ERYTHROMYCIN; BIRTH	A proactive environmental monitoring program was conducted to determine the risk and prevent nosocomial waterborne infections of Legionella spp. in infants. Sink taps in a neonatal intensive care unit (NICU) and two obstetric clinics were monitored for Legionella spp. A total of 59 water samples were collected during a 3-year period and 20 of them were found colonized with Legionella pneumophila.…	2019
Bhaskar, BH; Mulki, SS; Joshi, S; Adhikary, R; Venkatesh, BM	Molecular Characterization of Extended Spectrum β-lactamase and Carbapenemase Producing Klebsiella pneumoniae from a Tertiary Care Hospital	INDIAN JOURNAL OF CRITICAL CARE MEDICINE	AmpC; Carbapenemase; Extended spectrum beta-lactamase; Metallo beta-lactamase	ESCHERICHIA-COLI; RESISTANT ENTEROBACTERIACEAE; STRAINS; INFECTIONS; NDM-1; INDIA; SPP.	Objective: The extended-spectrum beta-lactamase (ESBL) and carbapenemase producing gram-negative bacteria among the members of Enterobacteriaceae are of major health concern globally. The present study was carried out to determine proportion and genetic characterization of ESBL and carbapenemase producing Klebsiella pneumoniae strains isolated from intensive care units of a tertiary care hospital…	2019
Li, XX; Ding, XY; Shi, P; Zhu, YQ; Huang, YD; Li, Q; Lu, JM; Li, ZP; Zhu, L	Clinical features and antimicrobial susceptibility profiles of culture-proven neonatal sepsis in a tertiary children's hospital, 2013 to 2017	MEDICINE	drug resistance; early-onset sepsis; late-onset sepsis; neonatal sepsis; neonate; pathogenic	LATE-ONSET SEPSIS; RESISTANT; EPIDEMIOLOGY; BIOMARKERS; PATHOGEN	Neonatal sepsis (NS) remains a major cause of morbidity and mortality in neonates, but data on the etiology and antibiotic susceptibility patterns of pathogens are limited. The aim of this study was to analyze the clinical characteristics, risk factors, and the antibiotic susceptibility patterns of pathogenic microbes associated with NS at a tertiary children's hospital in Shanghai, China. Episod…	2019
Arvind, N; Sushma, M; Krishnappa, J	Prevalence of Rotavirus and Adenovirus in the Childhood Gastroenteritis in a Tertiary Care Teaching Hospital	JOURNAL OF PURE AND APPLIED MICROBIOLOGY	Acute gastroenteritis; rota virus; adenovirus	DIARRHEAL DISEASE; CHILDREN; EPIDEMIOLOGY; ETIOLOGY	Gastroenteritis in the childhood is one of the most common cause of morbidity and mortality throughout the world. Acute gastroenteritis is caused by bacteria, viruses, parasites, and rarely fungi. The cases of viral gastroenteritis are gradually increasing resulting in a global problem among children. This warrants the need of local, regional and national epidemiological data on the most common a…	2019
Kutty, PK; Jain, S; Taylor, TH; Bramley, AM; Diaz, MH; Ampofo, K; Arnold, SR; Williams, DJ; Edwards, KM; McCullers, JA; Pavia, AT; Winchell, JM; Schrag, SJ; Hicks, LA	Mycoplasma pneumoniae Among Children Hospitalized With Community-acquired Pneumonia	CLINICAL INFECTIOUS DISEASES	community; pneumonia; mycoplasma; bacterial disease; children	MACROLIDE RESISTANCE; CHILDHOOD ENCEPHALITIS; OUTBREAK; PCR; INFECTION; DIAGNOSIS; EPIDEMIOLOGY; CULTURE; TESTS; ASSAY	Background. The epidemiology of Mycoplasma pneumoniae (Mp) among US children (< 18 years) hospitalized with community-acquired pneumonia (CAP) is poorly understood. Methods. In the Etiology of Pneumonia in the Community study, we prospectively enrolled 2254 children hospitalized with radiographically confirmed pneumonia from January 2010-June 2012 and tested nasopharyngeal/oropharyngeal swabs for…	2019
Zaha, DC; Kiss, R; Hegedus, C; Gesztelyi, R; Bombicz, M; Muresan, M; Pallag, A; Zrinyi, M; Pall, D; Vesa, CM; Micle, O	Recent Advances in Investigation, Prevention, and Management of Healthcare-Associated Infections (HAIs): Resistant Multidrug Strain Colonization and Its Risk Factors in an Intensive Care Unit of a University Hospital	BIOMED RESEARCH INTERNATIONAL		LACTAMASE-PRODUCING ENTEROBACTERIACEAE; GRAM-NEGATIVE BACTERIA; ACUTE PHYSIOLOGY SCORE; STAPHYLOCOCCUS-AUREUS; CHANGING EPIDEMIOLOGY; ESCHERICHIA-COLI; CARRIAGE; TRANSMISSION; PREVALENCE; ORGANISMS	Active screening for resistant multidrug strain carriers remains an important component of infection control policy in any healthcare setting indifferent of financial and logistical costs. The objective of our study was to determine the spectrum of bacterial colonization individually among intensive care unit patients. A retrospective observational study was performed in the Intensive CareUnit of…	2019
Nandan, TM; Bondugula, SK	Estimation of Methicillin Resistant Staphylococcus aureus Carriage among Patients' Visitors (Adults) in a Tertiary Care Hospital	JOURNAL OF PURE AND APPLIED MICROBIOLOGY	Staphylococcus aureus; MRSA carriage; patients' visitors; sheep blood agar; un-supplemented Mueller Hinton agar; Cefoxitin disc diffusion test		As community at large is also one of the potential habitats for emergence of multidrug resistant bacteria, exemplified by Methicillin Resistant Staphylococcus aureus(MRSA), due to widespread misuse of antibiotics at various levels including from non-human-healthcare sources like veterinary and poultry care along with unrestricted pharmacies, it was prudent to investigate the less trodden arena of…	2019
Enroth, H; Retz, K; Andersson, S; Andersson, C; Svensson, K; Ljungström, L; Tilevik, D; Pernestig, AK	Evaluation of QuickFISH and maldi Sepsityper for identification of bacteria in bloodstream infection	INFECTIOUS DISEASES	MALDI-TOF MS analysis; QuickFISH (R); sepsis diagnostics; blood culture; Maldi Sepsityper (TM)	DESORPTION-IONIZATION-TIME; FLIGHT MASS-SPECTROMETRY; COAGULASE-NEGATIVE STAPHYLOCOCCI; IN-SITU HYBRIDIZATION; MULTICENTER EVALUATION; SAMPLE PREPARATION; CULTURE BOTTLES; PNA FISH; TOF MS; MICROORGANISMS	Background: Early detection of bacteria and their antibiotic susceptibility patterns are critical to guide therapeutic decision-making for optimal care of septic patients. The current gold standard, blood culturing followed by subculture on agar plates for subsequent identification, is too slow leading to excessive use of broad-spectrum antibiotic with harmful consequences for the patient and, in…	2019
Pereira, SG; Alarico, S; Tiago, I; Reis, D; Nunes-Costa, D; Cardoso, O; Maranha, A; Empadinhas, N	Studies of antimicrobial resistance in rare mycobacteria from a nosocomial environment	BMC MICROBIOLOGY	Nontuberculous mycobacteria (NTM); Mycobacterium mucogenicum; Mycobacterium obuense; Mycobacterium paragordonae; Corynebacterineae; Antimicrobial resistance	R-PLASMID PTP10; NONTUBERCULOUS MYCOBACTERIA; CORYNEBACTERIUM-STRIATUM; MOLECULAR CHARACTERIZATION; GENUS MYCOBACTERIUM; SP NOV.; SUSCEPTIBILITY; INFECTIONS; WATER; MUCOGENICUM	BackgroundNontuberculous mycobacteria (NTM) are ubiquitous in nature and recognized agents of opportunistic infection, which is often aggravated by their intrinsic resistance to antimicrobials, poorly defined therapeutic strategies and by the lack of new drugs. However, evaluation of their prevalence in anthropogenic environments and the associated antimicrobial resistance profiles have been negl…	2019
Agnetti, J; Seth-Smith, HMB; Ursich, S; Reist, J; Basler, M; Nickel, C; Bassetti, S; Ritz, N; Tschudin-Sutter, S; Egli, A	Clinical impact of the type VI secretion system on virulence of Campylobacter species during infection	BMC INFECTIOUS DISEASES	Type IV secretion system; Campylobacter jejuni; Campylobacter coli; Virulence; Diarrhoea; Infection; Clinical course	EPIDEMIOLOGY; COMORBIDITY	BackgroundThe clinical course of Campylobacter infection varies in symptoms and severity depending on host factors, virulence of the pathogen and initiated therapy. The type VI secretion system (T6SS) has been identified as a novel virulence factor, which mediates contact-dependent injection of enzymes and toxins into competing bacteria or host cells and facilitates the colonisation of a host org…	2019
Hartvigsen, T; Sen, C; Rundensteiner, EA	Detecting MRSA Infections by Fusing Structured and Unstructured Electronic Health Record Data	BIOMEDICAL ENGINEERING SYSTEMS AND TECHNOLOGIES, BIOSTEC 2018	MRSA; Machine learning; Early prediction; Feature fusion	BIG DATA; PREDICTION; DISEASE	Methicillin-resistant Staphylococcus aureus (MRSA), an antibiotic resistant bacteria, is a common cause of one of the more devastating hospital-acquired infections (HAI) in the United States. In this work, we study the practicality of leveraging machine learning methods for early detection of MRSA infections based on a rich variety of patient information commonly available in modern Electronic He…	2019
Koyuncu Özyurt, Ö; Özhak, B; Ögünç, D; Yildiz, E; Çolak, D; Günseren, F; Öngüt, G	Evaluation of the BD Phoenix100 System and Colistin Broth Disk Elution Method for Antimicrobial Susceptibility Testing of Colistin Against Gram-negative Bacteria	MIKROBIYOLOJI BULTENI	Colistin broth disk elution method; BD Phoenix100 system; colistin broth microdilution method	RESISTANCE	Infections with multidrug resistant gram-negative bacteria is a growing problem especially in health care settings. Colistin is one of the last resort antibiotics for such infections in which treatment options are limited. Increasing resistance to colistin is a global problem. Clinical and Laboratory Standards Institute (CLSI) and the European Committee on Antimicrobial Susceptibility Testing (EU…	2019
Toner, G; Russell, CD; Hamilton, F; Templeton, K; Laurenson, IF	Phenotypic and molecular detection methods for carbapenemase-producing organisms and their clinical significance at two Scottish tertiary care hospitals	JOURNAL OF MEDICAL MICROBIOLOGY	carbapenemase-producing organisms; carbapenem-producing Enterobacteriaceae; carbapenem resistance; molecular diagnostics; antimicrobial resistance	ENTEROBACTERIACEAE; INFECTIONS	Purpose. This study evaluated in-house PCR testing for local identification of bacteria carrying the major carbapenemase genes (bla(OXA-48-like), bla(VIM), bla(NDM), bla(KPC) and bla(IMP)). Methodology. Carbapenemase-producing organisms (CPOs) isolated from patients managed in two tertiary care hospitals in Scotland from September 2014-January 2017 were investigated. A combination of chromogenic …	2019
Kang, JS; Yi, J; Ko, MK; Lee, SO; Lee, JE; Kim, KH	Prevalence and Risk Factors of Carbapenem-resistant Enterobacteriaceae Acquisition in an Emergency Intensive Care Unit in a Tertiary Hospital in Korea: a Case-Control Study	JOURNAL OF KOREAN MEDICAL SCIENCE	Carbapenem-Resistant Enterobacteriaceae; Incidence; Risk Factors; Intensive Care Units	COLONIZATION; EPIDEMIOLOGY; INFECTION; OUTCOMES; IMPACT	Background: Infections caused by carbapenem-resistant Enterobacteriaceae (CRE) are associated with high mortality rates and their treatment is difficult because treatment is limited to certain antibiotics, such as colistin and tigecycline. We aimed to perform active surveillance culture of CRE (ASC-CRE) to monitor the prevalence of CRE acquisition during intensive care unit (ICU) care and to exam…	2019
Li, GL; Sun, JJ; Pan, SC; Li, WT; Zhang, SJ; Wang, YF; Sun, XX; Xu, H; Ming, L	Comparison of the Performance of Three Blood Culture Systems in a Chinese Tertiary-Care Hospital	FRONTIERS IN CELLULAR AND INFECTION MICROBIOLOGY	BACTEC Plus; BacT/Alert; VersaTREK; blood culture system; simulated blood culture; bloodstream infection	PLUS AEROBIC/F; BACT/ALERT FA; STREAM INFECTIONS; MEDIA; BOTTLES; BACTEC-9240; ANAEROBIC/F; MORTALITY; CANDIDA; TIME	In this study, we evaluated the performance of three blood culture systems in a Chinese tertiary-care hospital. Samples of simulated bacteremia were prepared using 10 mL of fresh blood from healthy humans and bacterial suspensions of known cell density. Portions of the specimens were treated with an antibiotic or antifungal drug at specified concentrations to simulate antibacterial drug treatment…	2019
Kostyanev, T; Vilken, T; Lammens, C; Timbermont, L; Van't Veen, A; Goossens, H	Detection and prevalence of carbapenem-resistant Gram-negative bacteria among European laboratories in the COMBACTE network: a COMBACTE LAB-Net survey	INTERNATIONAL JOURNAL OF ANTIMICROBIAL AGENTS	Carbapenem resistance; Questionnaire; Clinical trials	DESORPTION IONIZATION-TIME; KLEBSIELLA-PNEUMONIAE; MASS-SPECTROMETRY; ENTEROBACTERIACEAE	Antimicrobial resistance (AMR) represents a global public health threat that jeopardises the progress medicine has made over the last century. To confront AMR, the Innovative Medicines Initiative (IMI) has supported the development of a large network of hospitals and laboratories in Europe as part of the New Drugs for Bad Bugs (ND4BB) programme and the COMBACTE projects. COMBACTE LAB-Net conducte…	2019
Pindi, G; Kale, P; Khillan, V; Khodhare, A	Elizabethkingia meningoseptica: Waiting to Strike	JOURNAL OF CLINICAL AND DIAGNOSTIC RESEARCH	Carbapenem resistance; Chronic liver disease; Multi drug resistance; Nosocomial infection	IMMUNE DYSFUNCTION; BILIARY-TRACT; BACTEREMIA; INFECTION; PATHOGEN; FEATURES	Introduction: The prevalence of nosocomial infection by Elizabethkingia meningoseptica (E. meningoseptica) has increased. It has been found to be associated with outbreaks of neonatal, adult and device related infections with mortality rates as high as 50%. Conventional empirical antibiotics against Gram-Negative Bacteria (GNB) are not effective against E. meningoseptica and interpretive Minimum …	2019
Wang, CR; Yuan, Z; Huang, WX; Yang, L; Tang, J; Liu, CW	Epidemiologic analysis and control strategy of Klebsiella pneumoniae infection in intensive care units in a teaching hospital of People's Republic of China	INFECTION AND DRUG RESISTANCE	Klebsiella pneumoniae; antibiotic resistance; carbapenem resistance; intensive care units	CARBAPENEM-RESISTANT ENTEROBACTERIACEAE; RISK-FACTORS; SURVEILLANCE; STRAINS	Background: Klebsiella pneumoniae (KP) is the most common pathogen isolated in intensive care units (ICUs) and the most frequently encountered carbapenemase-producing Enterobacteriaceae. Increasing antimicrobial drug resistance, especially in carbapenem-resistant KP (CRKP), can limit the choice of antibiotics used for the treatment of infectious diseases and further poses a negative impact on pat…	2019
Rizk, MA; Abou El-Khier, NT	Aminoglycoside Resistance Genes in Acinetobacter Baumannii Clinical Isolates	CLINICAL LABORATORY	Acinetobacter baumannii; aminoglycoside resistances; aminoglycoside modifying enzymes	STRAINS	Background: Acinetobacter baumannii (A. baumannii) is an opportunistic pathogen associated with serious hospital acquired infections. It is resistant to multiple antibiotics. The therapy for infections due to this bacterium is a combination of aminoglycosides with carbapenem antibiotics. There are recent reports of the prevalence of aminoglycoside resistance among A. baumannii. The aim of the pre…	2019
Nikaeen, M; Shamsizadeh, Z; Mirhoseini, SH	Direct Monitoring of Gram-negative Agents of Nosocomial Infections in Hospital Air by a PCR-based Approach	AEROSOL AND AIR QUALITY RESEARCH	Gram-negative bacteria; Nosocomial infection; Hospital; Air; PCR	RESISTANT ACINETOBACTER-BAUMANNII; INTENSIVE-CARE-UNIT; OUTBREAK; WATER; CONTAMINATION; AEROSOLS; SPP.	Gram-negative bacteria (GNB), including Acinetobacter baumannii, Pseudomonas aeruginosa and Legionella, have emerged as causative agents of many problematic infections in healthcare settings worldwide. Using a rapid detection method, this study was designed to investigate the presence of GNB in hospital air as a potential source for spreading and transmitting these bacteria. A total of 51 air sam…	2018
Tang, X; Xiao, M; Zhuo, C; Xu, YC; Zhong, NS	Multi-level analysis of bacteria isolated from inpatients in respiratory departments in China	JOURNAL OF THORACIC DISEASE	Respiratory departments; multi-drug resistant (MDR); multi-level analysis	RESISTANT STAPHYLOCOCCUS-AUREUS; CARE-ASSOCIATED PNEUMONIA; KLEBSIELLA-PNEUMONIAE; CARBAPENEM-RESISTANT; ACQUIRED PNEUMONIA; ESCHERICHIA-COLI; EPIDEMIOLOGY; ADULTS; SURVEILLANCE; PRESCRIPTION	Background: With the different situation for clinical antibiotic usage and its management in different regions and medical institutions, the antimicrobial resistance varied in different level. However, the epidemiological data of multi-drug resistant (MDR) strains from the department of respiration is limited. Thus, this study aims to investigate the epidemiology of bacteria isolated from inpatie…	2018
AbdEl-Mongy, M; El-Feky, S; Masoud, H; El-Hendi, A	Rapid Assays for Detection of Clostridium difficile and Its Toxins in Hospitalized Patients	JOURNAL OF PURE AND APPLIED MICROBIOLOGY			In this study, the rapid detection of Clostridium difficile and its toxins (A/B) in admitting patients in hospitals were offered the possibility of prevention of the bacterium spread into other patients. This bacterium is the most common cause of hospital-acquired diarrhea in patients treated with antibiotics, chemotherapeutic agents and other drugs that alter the normal equilibrium of the intest…	2018
Furukawa, M; McCaughan, J; Stirling, J; Millar, BC; Bell, J; Goldsmith, CE; Reid, A; Misawa, N; Moore, JE	Muddy puddles - the microbiology of puddles located outside tertiary university teaching hospitals	LETTERS IN APPLIED MICROBIOLOGY	bacteria; cystic fibrosis; infection control; microbiology; Pseudomonas aeruginosa; puddles; water	PSEUDOMONAS-AERUGINOSA	In the British Isles, the frequency of rain results in the formation of puddles on footpaths and roads in/around hospitals. No data are available demonstrating the microbiological composition of such puddles and therefore a study was undertaken to examine the microbiology of puddles in the grounds of two tertiary university-teaching hospitals (18 sites) and compared with control puddles from non-…	2018
Li, RZ; Goswami, U; King, M; Chen, J; Cesario, TC; Rentzepis, PM	In situ detection of live-to-dead bacteria ratio after inactivation by means of synchronous fluorescence and PCA	PROCEEDINGS OF THE NATIONAL ACADEMY OF SCIENCES OF THE UNITED STATES OF AMERICA	bacteria inactivation; fluorescence spectroscopy; PCA	URINARY-TRACT-INFECTION; UV DISINFECTION; RISK-FACTORS; SPECTROSCOPY; RESISTANT; MORTALITY; OUTBREAK	The determination of live and dead bacteria is of considerable significance for preventing health care-associated infection in hospitals, field clinics, and other areas. In this study, the viable (live) and nonviable (dead) bacteria in a sample were determined by means of their fluorescence spectra and principal component analysis (PCA). Data obtained in this study show that it is possible to ide…	2018
Fleece, ME; Pholwat, S; Mathers, AJ; Houpt, ER	Molecular diagnosis of antimicrobial resistance in Escherichia coli	EXPERT REVIEW OF MOLECULAR DIAGNOSTICS	Molecular diagnostics; mechanisms of resistance; Escherichia coli; antimicrobial resistance; whole genome sequencing; extended-spectrum beta-lactamase; carbapenemase; PCR; microarray	MEDIATED QUINOLONE RESISTANCE; GRAM-NEGATIVE BACILLI; MODIFIED HODGE TEST; CARBA-R ASSAY; ANTIBIOTIC-RESISTANCE; EXTENDED-SPECTRUM; FLUOROQUINOLONE RESISTANCE; CARBAPENEMASE PRODUCTION; DNA GYRASE; RAPID IDENTIFICATION	Introduction: Antimicrobial resistance is a growing global public health threat. The complexities of antimicrobial resistance in gram-negative bacteria such as Escherichia coli pose significant diagnostic and therapeutic challenges. Molecular diagnostics are emerging in this field.Areas covered: The authors review the clinical importance of pathogenic E. coli and discuss the mechanisms of resista…	2018
Santiveri, CR; Sismaet, HJ; Kimani, M; Goluch, ED	Electrochemical Detection of Pseudomonas aeruginosa in Polymicrobial Environments	CHEMISTRYSELECT	biosensors; electrochemistry; polymicrobial; Pseudomonas aeruginosa; pyocyanin	CARE-ASSOCIATED INFECTIONS; PYOCYANIN PRODUCTION; WOUND INFECTIONS; MICROBIAL PATHOGENESIS; MECHANISMS; BIOFILMS; BACTERIA; PATIENT; SAMPLES	A major cause of hospital-acquired infections is Pseudomonas aeruginosa, a gram-negative bacterial pathogen. This bacterium secretes a unique, redox-active molecule known as pyocyanin that can serve as a useful biomarker for identification and detection of this opportunistic pathogen. This current study investigates the impact to pyocyanin production and ability to electrochemically distinguish p…	2018
Armin, S; Fallah, F; Azimi, L; Kafil, HS; Ghazvini, K; Hasanzadeh, S; Karimi, A	Warning: spread of NDM-1 in two border towns of Iran	CELLULAR AND MOLECULAR BIOLOGY	NDM-1; Acinetobacter baumannii; Enterobacter spp.; Iran	METALLO-BETA-LACTAMASE-1-PRODUCING KLEBSIELLA-PNEUMONIAE; METALLO-BETA-LACTAMASE; ACINETOBACTER-BAUMANNII; ESCHERICHIA-COLI; CARBAPENEMASES; PREVALENCE; TURKEY; GENES; RESISTANCE; BURN	NDM-1 producing gram-negative bacteria can be resistant to every beta-lactam antibiotic, including carbapenem which is one of the last-lines of antibiotic therapy against multi-drug resistant bacteria. This study aimed to detect the metallo-beta-lactamase in the isolated gram-negative bacteria of the Iranian clinical specimens collected from two major cities in Iran. In this cross sectional study…	2018
Zirk, M; Zalesski, A; Peters, F; Dreiseidler, T; Buller, J; Kreppel, M; Zöller, JE; Zinser, M	Prevention and management of bacterial infections of the donor site of flaps raised for reconstruction in head and neck surgery	JOURNAL OF CRANIO-MAXILLOFACIAL SURGERY	Surgical site infection; Donor site; Flaps for reconstruction in head and neck surgery	RESISTANT PSEUDOMONAS-AERUGINOSA; LATISSIMUS-DORSI FLAP; ANTIBIOTIC-PROPHYLAXIS; DELAYED PRIMARY; MORBIDITY; CLOSURE	Purpose: In the field of reconstructive head and neck surgery, surgical site infections (SSI) are commonly investigated for the recipient site of various reconstructive procedures. Data about SSI of the donor site of different flaps raised for reconstruction are rare. Material and Methods: With regard to the bacterial donor site infections, we retrospectively investigated the medical data, surgic…	2018
Talreja, S; Chohan, MN; Dass, D	Significance of Upper GI endoscopy for the detection of upper GI bleeding in children	RAWAL MEDICAL JOURNAL	UGI bleeding; Esophageal varices; gastric erosion; H Pylori		Objective: To determine the significance of Upper GI endoscopy for the detection of upper GI bleeding in children visiting a tertiary care hospital, Karachi, Pakistan. Methodology: A total of 122 Children attending the pediatric emergency and pediatric unit of civil hospital Karachi with history of upper GI bleeding were included in this study which lasted for six months from May 1, 2015 to Novem…	2018
Liu, XL; Xiao, Y; Zhang, H; Wu, LJ	Comparison of Vagina Flora in Patients with Spontaneous Abortion and Women with Normal First-Trimester	REPRODUCTIVE AND DEVELOPMENTAL MEDICINE	Bacterial Vaginosis; Pregnancy; Spontaneous Abortion; Vaginal Infection; Vulvovaginal Candidiasis	GROUP-B STREPTOCOCCUS; GENITAL-TRACT; CANDIDA-ALBICANS; PREGNANT-WOMEN; INFECTION; COLONIZATION; UREAPLASMAS; DIAGNOSIS	Objective: The effect of alterations in vaginal flora during pregnancy remains uncertain. We compared the flora distribution in women with spontaneous abortion (SA) and those in normal condition. Methods: Samples of vaginal discharge were obtained from 3,233 women attending the Gynecological and Public Health Centre of our hospital from January 2010 to December 2013. Pathogen culture testing was …	2018
De Angelis, G; Posteraro, B; De Carolis, E; Menchinelli, G; Franceschi, F; Tumbarello, M; De Pascale, G; Spanu, T; Sanguinetti, M	T2Bacteria magnetic resonance assay for the rapid detection of ESKAPEc pathogens directly in whole blood	JOURNAL OF ANTIMICROBIAL CHEMOTHERAPY		INTERNATIONAL CONSENSUS DEFINITIONS; STREAM INFECTIONS; SEPTIC SHOCK; MOLECULAR DIAGNOSIS; CRITICALLY-ILL; SEPSIS; IDENTIFICATION; THERAPY; ONSET; TIME	Objectives: To evaluate the magnetic resonance-based T2Bacteria Panel assay for direct detection of ESKAPEc (Enterococcus faecium, Staphylococcus aureus, Klebsiella pneumoniae, Acinetobacter baumannii, Pseudomonas aeruginosa and Escherichia coli) pathogens in blood samples of patients with suspected bloodstream infection (BSI). Patients and methods: Adult patients admitted to the Emergency Medici…	2018
Abdulall, AK; Tawfick, MM; El Manakhly, AR; El Kholy, A	Carbapenem-resistant Gram-negative bacteria associated with catheter-related bloodstream infections in three intensive care units in Egypt	EUROPEAN JOURNAL OF CLINICAL MICROBIOLOGY & INFECTIOUS DISEASES	Carbapenem resistance; Gram-negative bacteria; Catheter-related bloodstreaminfections; ERIC-PCR	KLEBSIELLA-PNEUMONIAE; ENTEROBACTERIACEAE; SURVEILLANCE; PREVALENCE; HOSPITALS; TRENDS	We aimed to identify the carbapenem-resistant Gram-negative bacteria (GNB) causing catheter-related bloodstream infections (CRBSI) in intensive care units (ICU) in a tertiary care Egyptian hospital, to study their resistance mechanisms by phenotypic and genetic tests, and to use ERIC-PCR for assessing their relatedness. The study was conducted over 2 years in three ICUs in a tertiary care hospita…	2018
Kutlu, HH; Us, E; Tekeli, A	Investigation of Carbapenemase Genes and Molecular Epidemiology of Enterobacteriaceae Strains Isolated between 2010-2014 in a University Hospital	MIKROBIYOLOJI BULTENI	Carbapenem resistance; carbapenemase-encoding genes; Enterobacteriaceae; OXA-48; pulsed-field gel electrophoresis	RESISTANT KLEBSIELLA-PNEUMONIAE; METALLO-BETA-LACTAMASE; OXA-48; SPREAD; OUTBREAK; IDENTIFICATION; OXACILLINASE; ISTANBUL; TURKEY	The worldwide spread of carbapenemase producing Enterobacteriaceae isolates has become a major threat of public health. This worrisome situation leads the development of new methods for carbapenemase screening, detection, prevention of spread and epidemiological data collection as mandatory. In this study, it was aimed to investigate existence and distribution of carbapenemase-encoding genes (CEG…	2018
Al-Ruwaili, MA	The coa, mec, and spa Genes Diversity among Methicillin-resistant Staphylococcus aureus Strains from Health-care Workers and Patients	NIGERIAN JOURNAL OF CLINICAL PRACTICE	Antibiotic susceptibility; coa gene; mecA gene; methicillin-resistant Staphylococcus aureus; spa gene	FRAGMENT-LENGTH-POLYMORPHISM; COAGULASE GENE; MOLECULAR ANALYSIS; PROTEIN-A; PCR-RFLP; INFECTIONS; PREVALENCE; MRSA	Background: Methicillin-resistant Staphylococcus aureus (MRSA) is a bacterial pathogen that is frequently isolated in both hospital and community environments. MRSA is considered a major nosocomial pathogen that causes severe morbidity and mortality. Materials and Methods: Two hundred and twenty-five nasal swabs were collected (100 from health-care workers and 125 from patients). S. aureus was id…	2018
Phokrai, P; Karoonboonyanan, W; Thanapattarapairoj, N; Promkong, C; Dulsuk, A; Koosakulnirand, S; Canovali, S; Indrawattana, N; Jutrakul, Y; Wuthiekanun, V; Limmathurotsakul, D; Brett, PJ; Burtnick, MN; Lertmemongkolchai, G; Chantratita, N	A Rapid Immunochromatography Test Based on Hcp1 Is a Potential Point-of-Care Test for Serological Diagnosis of Melioidosis	JOURNAL OF CLINICAL MICROBIOLOGY	Burkholderia pseudomallei; immunochromatography test; antibody detection; melioidosis; point-of-care test; rapid test; serological diagnosis	BURKHOLDERIA-PSEUDOMALLEI; ASSAY; ANTIBODIES; ACCURACY	Melioidosis is a fatal infectious disease caused by the environmental bacterium Burkholderia pseudomallei. It is highly endemic in Asia and northern Australia but neglected in many other tropical countries. Melioidosis patients have a wide range of clinical manifestations, and definitive diagnosis requires bacterial culture, which can be time-consuming. A reliable rapid serological tool is greatl…	2018
Huang, SG; Jin, XY; Lin, RZ; Lin, X; Xue, N; Fan, YQ; Zu, G; Ma, L; Luo, XB; Huang, GL	Microfluidic Chip Based Nucleic Acid Analyzer and Its Application in Precision Medicine	CHINESE JOURNAL OF LASERS-ZHONGGUO JIGUANG	medical optics; biomedical photonics; nucleic acid analyzer; molecular diagnostics; precision medicine; microfluidic chip; isothermal amplification; confocal imaging		In view of the current clinical practice, the detection of pathogenic bacteria mainly depends on bacterial culture methods. The methods have disadvantages of long cycle and low accuracy, and are prone to cross contamination and human infection. We propose the microfluidic chip based isothermal nucleic acid amplification for molecular diagnostics. An air-insulated microfluidic chip is designed for…	2018
Li, XY; Ke, BX; Chen, CN; Xiao, HL; Liu, MZ; Xiong, YC; Bai, R; Chen, JD; Ke, CW	First co-infection case of melioidosis and Japanese encephalitis in China	BMC INFECTIOUS DISEASES	Burkholderia pseudomallei; JEV; Co-infection; First case; Central nervous system infection	PSEUDOMONAS-PSEUDOMALLEI; HAINAN	Background: Melioidosis is endemic in Southeast Asia and northern Australia. Infection usually follows percutaneous inoculation or inhalation or ingestion of the causative bacterium, Burkholderia pseudomallei, which is present in soil and surface water in endemic regions. Japanese encephalitis (JE) is a vector-borne viral zoonosis caused by Japanese encephalitis virus (JEV), leading to epidemic e…	2018
Pannala, R; Baldwin, B; Aluru, V; Grys, TE; Holmes, J; Miller, LJ; Harrison, ME; Nguyen, CC; Tenover, FC; Persing, D; Faigel, DO	Prospective study of the feasibility of point-of-care testing strategy for carbapenem-resistant organism detection	ENDOSCOPY INTERNATIONAL OPEN		ESCHERICHIA-COLI; BETA-LACTAMASE; DUODENOSCOPES; TRANSMISSION; ENTEROBACTERIACEAE; OUTBREAK; SURVEILLANCE; INFECTION; RISK	Background/aims In an investigator-initiated, prospective study, we evaluated the feasibility of a five-gene sequence point-of-care (POC) testing strategy (Xpert CARBA-R Assay, Cepheid Inc., Sunnyvale, CA, USA), compared to reference laboratory PCR (48 - 72 hours turnaround time, two gene sequences), in patients undergoing endoscopic retrograde cholangiopancreatography (ERCP) and in a hospital ou…	2018
Katchanov, J; Asar, L; Klupp, EM; Both, A; Rothe, C; König, C; Rohde, H; Kluge, S; Maurer, FP	Carbapenem-resistant Gram-negative pathogens in a German university medical center: Prevalence, clinical implications and the role of novel β-lactam/β-lactamase inhibitor combinations	PLOS ONE		MULTICENTER EVALUATION; KLEBSIELLA-PNEUMONIAE; MULTIPLEX PCR; ORGANISMS; ENTEROBACTERIACEAE; INFECTIONS; CEFTOLOZANE/TAZOBACTAM; AVIBACTAM; STRATEGY; BACTERIA	Objectives To determine the spectrum of infections with multidrug-resistant Gram-negative bacteria (MDR-GNB) and the clinical impact of the newly available betalactam/betalactamase inhibitor combinations ceftolozane/tazobactam and ceftazidime/avibactam in a German academic tertiary care center. Methods Retrospective analysis. Results Between September 1, 2015 and August 31, 2016, 119 individual p…	2018
Ben Helal, R; Dziri, R; Chedly, M; Klibi, N; Barguellil, F; El Asli, MS; Ben Moussa, M	Occurrence and Characterization of Carbapenemase-Producing Enterobacteriaceae in a Tunisian Hospital	MICROBIAL DRUG RESISTANCE	Enterobacteriaceae; CPE; carbapenemase; OXA-48; NDM-1; VIM; multiplex PCR	KLEBSIELLA-PNEUMONIAE; RESISTANT ENTEROBACTERIACEAE; BETA-LACTAMASE; OXA-48 CARBAPENEMASE; RISK-FACTORS; SPREAD; INFECTIONS; EMERGENCE; EPIDEMIOLOGY; COMMUNITY	Carbapenem-resistant Enterobacteriaceae have become of particular concern, since they were quickly disseminated in various areas in the world. The aim of the study was to investigate the prevalence of carbapenemase production among clinical isolates of Enterobacteriaceae recovered from the Military Hospital of Tunisia. Bacterial isolates (n=125) were recovered from patients in diverse services fr…	2018
Saghafi, N; Pourali, L; Ghazvini, K; Maleki, A; Ghavidel, M; Karbalaeizadeh, M	Cervical bacterial colonization in women with preterm premature rupture of membrane and pregnancy outcomes: A cohort study	INTERNATIONAL JOURNAL OF REPRODUCTIVE BIOMEDICINE	Bacterial colonization; Genital tract; Preterm premature rupture of membrane	NEONATAL OUTCOMES; CHORIOAMNIONITIS; SEPSIS	Background: One of the most important etiologies in pretermpremature rupture of membranes (PPROM) is cervical bacterial colonization. Objective: This study evaluated cervical bacterial colonization in women with PPROM and the pregnancy outcomes. Materials and Methods: In this cohort study, 200 pregnant women with PPROM at 27-37 wk of gestation who were admitted in an academic hospital of Mashhad …	2018
Moosavian, M; Ghadri, H; Samli, Z	Molecular detection of vanA and vanB genes among vancomycin-resistant enterococci in ICU-hospitalized patients in Ahvaz in southwest of Iran	INFECTION AND DRUG RESISTANCE	Enterococcus faecalis; Enterococcus faecium; multiplex PCR; vancomycin	FAECIUM; EPIDEMIOLOGY; FAECALIS; OUTBREAK; HUMANS	Objective: Nosocomial infections due to vancomycin-resistant enterococci (VRE) are known as a source of spreading these bacteria. The aim of this prospective study was molecular detection of vanA and vanB genes among VRE isolated from patients admitted to intensive care units (ICUs) in Ahvaz in southwest of Iran. Materials and methods: Overall, 243 non-duplicate rectal swab specimens were collect…	2018
Smith, RJ; Klieger, SB; Sulieman, SE; Berger, E; Treat, JR; Fisher, BT	Retrospective review of immunocompromised children undergoing skin biopsy for suspected invasive infection: Analysis of factors predictive of invasive mold	PEDIATRIC DERMATOLOGY	immunodeficiency; infection-fungal; skin signs of systemic disease; therapy-systemic	ASPERGILLOSIS; EPIDEMIOLOGY; MULTICENTER; MANAGEMENT	ObjectivesCutaneous lesions are often the first marker of invasive mold infection, which can cause substantial morbidity in immunocompromised children. The purpose of this study was to describe the evaluation and outcomes of immunocompromised children who presented with findings requiring skin biopsy because of concern about invasive infection. In children who were biopsied, we sought to determin…	2018
Zheng, YH; Chen, HX; Yao, MS; Li, XG	Bacterial pathogens were detected from human exhaled breath using a novel protocol	JOURNAL OF AEROSOL SCIENCE	Airborne transmission; Pathogens; Exhaled breath condensate; Throat swabs; LAMP	ISOTHERMAL AMPLIFICATION LAMP; PSEUDOMONAS-AERUGINOSA; HAEMOPHILUS-INFLUENZAE; AIRBORNE TRANSMISSION; RESPIRATORY-TRACT; MULTIPLEX PCR; CONDENSATE; DIAGNOSIS; INFECTION; EXPOSURE	It is generally believed that influenza outbreak is associated with breath-borne transmission of viruses, however relevant evidence is little for that of respiratory bacterial infections. On another front, point-of-care infection diagnostic methods at the bedside are significantly lacking. Here, we used a newly developed protocol of integrating an exhaled breath condensate (EBC) collection device…	2018
Nellums, LB; Thompson, H; Holmes, A; Castro-Sánchez, E; Otter, JA; Norredam, M; Friedland, JS; Hargreaves, S	Antimicrobial resistance among migrants in Europe: a systematic review and meta-analysis	LANCET INFECTIOUS DISEASES		STAPHYLOCOCCUS-AUREUS; ANTIBIOTIC-RESISTANCE; COMMUNITY; INFECTIONS; TRANSMISSION; TUBERCULOSIS; PREVALENCE; ORGANISMS; EMERGENCE; REFUGEES	Background Rates of antimicrobial resistance (AMR) are rising globally and there is concern that increased migration is contributing to the burden of antibiotic resistance in Europe. However, the effect of migration on the burden of AMR in Europe has not yet been comprehensively examined. Therefore, we did a systematic review and meta-analysis to identify and synthesise data for AMR carriage or i…	2018
Wang, HP; Zhang, HJ; Liu, J; Dong, Q; Duan, S; Ge, JQ; Wang, ZH; Zhang, Z	Antimicrobial resistance of 3 types of gram-negative bacteria isolated from hospital surfaces and the hands of health care workers	AMERICAN JOURNAL OF INFECTION CONTROL	GN bacteria; Inanimate surfaces; Hands; Antimicrobial resistance	ACINETOBACTER-BAUMANNII; CONTAMINATED SURFACES; KLEBSIELLA-PNEUMONIAE; ESCHERICHIA-COLI; INFECTION; DISINFECTION; TRANSMISSION; OUTBREAK	Background: There has been an increased focus in recent years on antimicrobial resistance of bacteria isolated from clinical samples. However, resistance of bacteria from hospital environments has been less frequently investigated. Methods: According to hygienic standard for disinfection in hospitals, samples were collected from hospital inanimate surfaces and the hands of health care workers aft…	2017
Righi, L; Amarsy, R; Picat, MQ; Thuillier, M; Cambau, E; Raskine, L; Chevret, S; Flicoteaux, R	Monitoring antimicrobial resistance (AMR) using CUSUM control charts	EUROPEAN JOURNAL OF CLINICAL MICROBIOLOGY & INFECTIOUS DISEASES		LACTAMASE-PRODUCING ENTEROBACTERIACEAE; HAND HYGIENE; CARE; OUTCOMES	We evaluated the use of the Cumulative Summation (CUSUM) control chart methodology for detection of an excessive increase in antimicrobial-resistant (AMR) bacteria acquisition. We used administrative, clinical and bacteriological data from all 157,570 patients hospitalized for at least 48 h from January 1, 2010 to December 31, 2015 in a 654-bed university teaching hospital in Paris, France. Month…	2017
Siddiqui, S; Saeed, M; Faisal, SM; Akhter, A; Sarim, KM; Khan, M; Ahmad, I; Ahmad, I	Molecular and phenotypic characterization of the vancomycin-resistant gene in bacterial isolates acquired from catheter tips	CELLULAR AND MOLECULAR BIOLOGY	Vancomycin; Resistance; Minimum inhibitory concentration; Nosocomial infections	STAPHYLOCOCCUS-AUREUS; NOSOCOMIAL INFECTIONS; EPIDEMIOLOGY; COST	Gram-positive bacteria, particularly Staphylococcus aureus is a significant pathogen, not only in the hospital setting but the community also. S. aureus is a major cause of serious hospital and community-acquired infections, particularly in the colonized individuals. The emergence of vancomycin-resistant S. aureus (VRSA) strains has led to global concerns about treatments for staphylococcal infec…	2017
Yang, DY; Lin, LT; Guo, PH; Zhang, WN; He, XF; Huang, QY; Lai, LH; Long, WQ	Flashlight contamination and effectiveness of two disinfectants in a stomatology hospital	INTERNATIONAL JOURNAL OF NURSING SCIENCES	Flashlights; Cross-contamination; Infection control; Disinfectant	PSEUDOMONAS-AERUGINOSA; EFFICACY	Aim: This study aims to assess the infection risks of flashlight contamination in a stomatology hospital and compare the disinfection effectiveness of alcohol (75%) and disinfecting wipes. Background: The flashlight is a basic non-critical medical device in oral and maxillofacial surgery wards. Wounds are mostly found in oral cavities; therefore, reusable flashlights may be a potential source of …	2017
Raberalam, T; Balde, M; Hantova, S; Vena, A; Marchandin, H; Sorli, B	Feasibility of capacitive aptasensor on paper to detect pathogenic bacteria responsible for nosocomial infection	BIOSENSORS 2016	Biosensor; POC Test; Sensor on flexible substrate		Nosocomial infections are contracted in a hospital or health care facility. Bacterial cause is the most common in 87% of cases. Studies have been conducted for the detection of these bacteria. The aim of this biosensor is to make an early detection tool, easy to use, reliable, not invasive and low cost. The goal is to detect in real time and simultaneously in a small amount of body fluids such as…	2017
Khurana, S; Mathur, P; Kapil, A; Valsan, C; Behera, B	Molecular epidemiology of beta-lactamase producing nosocomial Gram-negative pathogens from North and South Indian hospitals	JOURNAL OF MEDICAL MICROBIOLOGY	Gram-negative bacteria; multi-drug resistance; ESBLs; AmpC; carbapenemases	KLEBSIELLA-PNEUMONIAE; ESCHERICHIA-COLI	Purpose. Resistant Gram-negative bacterial (GNB) infections, apart from tremendously escalating the cost of treatment, are a cause for substantial morbidity and mortality among hospitalized patients. Such bacteria are rapidly acquiring resistance to many antimicrobial agents, especially the beta-lactams which are the most frequently prescribed antimicrobials in hospital and community patient care…	2017
Ferstl, PG; Filmann, N; Brandt, C; Zeuzem, S; Hogardt, M; Kempf, VAJ; Müller, M; Waidmann, O; Reinheimer, C	The impact of carbapenem resistance on clinical deterioration and mortality in patients with liver disease	LIVER INTERNATIONAL	carbapenem resistance; cirrhosis; liver disease; multidrug-resistant organisms; sepsis	IMMUNE DYSFUNCTION; STENOTROPHOMONAS-MALTOPHILIA; ACINETOBACTER-BAUMANNII; BACTERIAL-INFECTIONS; CIRRHOTIC-PATIENTS; RISK-FACTORS; ENTEROBACTERIACEAE; ACQUISITION; PREVALENCE; SEPSIS	Background & AimsInfections with multidrug-resistant gram-negative bacteria are significantly impairing the prognosis of patients with liver disease. In particular, carbapenem resistance further narrows therapeutic options. This study investigates the impact of carbapenem-resistant gram-negative bacteria on the outcome of patients with liver disease and cirrhosis. MethodsBetween January 2011 and …	2017
Cirkovic, I; Trajkovic, J; Hauschild, T; Andersen, PS; Shittu, A; Larsen, AR	Nasal and pharyngeal carriage of methicillinresistant Staphylococcus sciuri among hospitalised patients and healthcare workers in a Serbian university hospital	PLOS ONE		COAGULASE-NEGATIVE STAPHYLOCOCCI; MOLECULAR CHARACTERIZATION; RESISTANCE; STRAINS; MEMBERS; AUREUS; MEC; GENES; IDENTIFICATION; EPIDEMIOLOGY	There has been a paucity of data on methicillin-resistant Staphylococcus sciuri (MRSS) epidemiology in European healthcare settings. The aim of the study was to determine the prevalence of nasal and pharyngeal carriage and diversity of MRSS among inpatients and healthcare workers (HCWs) in the largest healthcare centre in Serbia, and to assess performance of different methods for MRSS screening. …	2017
Yektamoghaddam, N; Ariaee, AR; Davoudi, N	RECOGNITION OF THE EXTENDED-SPECTRUM-B-LACTAMASES (ESBLS) AMONGST THE GRAM-NEGATIVE BACTERIA ISOLATED FROM BURN WOUND INFECTION	INTERNATIONAL JOURNAL OF LIFE SCIENCE AND PHARMA RESEARCH	ESBLs; P. aurangiosa; Acinetobacter; Antibiotic resistance	BETA-LACTAMASE; MICROBIOLOGY LABORATORIES; ANTIMICROBIAL RESISTANCE; ESCHERICHIA-COLI; ENTEROBACTERIACEAE; STANDARDS; GENES	Burn wound infections have caused high rate of death. Gram negative bacteria such as Pseodomonas auranginosae and Acinetobacteria have been reported as one of the most important bacteria involving in the infections. Besides, different level of resistance to beta-lactam antibiotics have been observed amongst the bacterial strains. Accordingly, the aim of this study was to phenotypically detect the…	2017
Leite, CAK; Oizumi, KY; Caleffi-Ferracioli, KR; Scodro, RBD; de Pádua, RAF; Cardoso, RF; Pires, CTA; Siqueira, VLD	β-lactamase-producing Gram-negative bacteria in an intensive care unit in southern Brazil	BRAZILIAN JOURNAL OF PHARMACEUTICAL SCIENCES	Enterobacteriaceae; Pseudomonas aeruginosa; Acinetobacter spp.; Antimicrobial resistance; Beta-lactamases; Bacterial typing; Intensive Care Unit/study/Brazil; Drug-resistant bacteria	ANTIMICROBIAL RESISTANCE; KLEBSIELLA-PNEUMONIAE; SURVEILLANCE PROGRAM; INFECTION-CONTROL; MULTIPLEX PCR; ENTEROBACTERIACEAE; CARBAPENEMASES; DISSEMINATION; EPIDEMIOLOGY; EMERGENCE	The present study evaluated the antimicrobial susceptibility profile, beta-lactamase production, and genetic diversity of Enterobacteriaceae, Pseudomonas aeruginosa, and Acinetobacter spp. using phenotypic identification, antimicrobial susceptibility testing, and beta-lactamase phenotypic detection. Isolates were obtained from patients in an intensive care unit in a hospital in southern Brazil. B…	2017
Francis, D; Hodgkinson, J; Walton, C; Sizer, J; Black, P; Livingstone, B; Fowler, DP; Patel, MK; Tatam, RP	Mid-IR spectroscopic instrumentation for point-of-care diagnosis using a hollow silica waveguide gas cell	OPTICAL DIAGNOSTICS AND SENSING XVII: TOWARD POINT-OF-CARE DIAGNOSTICS	Mid-infrared; spectroscopy; quantum cascade laser; hollow silica waveguide; biomarker; volatile organic compounds (VOCs); diagnostics; headspace; point-of-care	VOLATILE ORGANIC-COMPOUNDS; DISEASES	Laser spectroscopy provides the basis of instrumentation developed for the diagnosis of infectious disease, via quantification of organic biomarkers that are produced by associated bacteria. The technology is centred on a multi-channel pulsed quantum cascade laser system that allows multiple lasers with different wavelengths to be used simultaneously, each selected to monitor a different diagnost…	2017
Fernández, J; Cunningham, SA; Fernández-Verdugo, A; Viña-Soria, L; Martín, L; Rodicio, MR; Escudero, D; Vazquez, F; Mandrekar, JN; Patel, R	Evaluation of a real-time PCR assay for rectal screening of OXA-48-producing Enterobacteriaceae in a general intensive care unit of an endemic hospital	DIAGNOSTIC MICROBIOLOGY AND INFECTIOUS DISEASE	Carbapenemases; Real-time PCR; OXA-48; Vim; Active surveillance	CARBAPENEMASE-PRODUCING ENTEROBACTERIACEAE; CHECK-DIRECT CPE; KLEBSIELLA-PNEUMONIAE; OXA-48-LIKE CARBAPENEMASES; RAPID DETECTION; RISK-FACTORS; SURVEILLANCE; DISSEMINATION; EPIDEMIOLOGY; MULTICENTER	Carbapenemase-producing Enterobacteriaceae are increasing worldwide. Rectal screening for these bacteria can inform the management of infected and colonized patients, especially those admitted to intensive care units (ICUs). A laboratory developed, qualitative duplex real-time polymerase chain reaction assay for rapid detection of OXA-48-like and VIM producing Enterobacteriaceae, performed on rec…	2017
Herruzo, R; Ruiz, G; Perez-Blanco, V; Gallego, S; Mora, E; Vizcaino, MJ; Omeñaca, F	Bla-OXA48 gene microorganisms outbreak, in a tertiary Children's Hospital, Over 3 years (2012-2014) Case Report	MEDICINE	Bla-OXA48; control; outbreak; tertiary Children's-Hospital	CARBAPENEM-RESISTANT ENTEROBACTERIACEAE; INTENSIVE-CARE-UNIT; KLEBSIELLA-PNEUMONIAE; NOSOCOMIAL INFECTION; BETA-LACTAMASE; RISK-FACTORS; DISINFECTION; EPIDEMIOLOGY; PREVENTION; HEALTH	Rationale: Carbapenem-resistant Enterobacteriaceae are an emerging problem in children. Nosocomial spread remains the principal risk factor for acquisition of these microorganisms. Patients concerns: We describe an outbreak of Klebsiella pneumoniae OXA48 (KOXA48) in a tertiary children's hospital during the years 2012 to 2014, as well as the preventive measures put in place in colonized and infec…	2017
Etchebarne, BE; Li, ZG; Stedtfeld, RD; Nicholas, MC; Williams, MR; Johnson, TA; Stedtfeld, TM; Kostic, T; Khalife, WT; Tiedje, JM; Hashsham, SA; Hughes, MJ	Evaluation of Nucleic Acid Isothermal Amplification Methods for Human Clinical Microbial Infection Detection	FRONTIERS IN MICROBIOLOGY	clinical pathogen infection; rapid detection; direct amplification; sepsis	EMERGENCY-DEPARTMENT; SEVERE SEPSIS; BLOOD; IDENTIFICATION; PATHOGENS; WATER; ASSAY; CARE	Battling infection is a major healthcare objective. Untreated infections can rapidly evolve toward the condition of sepsis in which the body begins to fail and resuscitation becomes critical and tenuous. Identification of infection followed by rapid antimicrobial treatment are primary goals of medical care, but precise identification of offending organisms by current methods is slow and broad spe…	2017
Oba, Y; Nakajima, T; Chiyo, C; Kawanami, M; Fujiwara, M; Matsumura, I	Longitudinal nosocomial outbreak of Pseudomonas fluorescens bloodstream infection of 2 years' duration in a coronary care unit	AMERICAN JOURNAL OF INFECTION CONTROL	Case-control study; Non-fermenting bacteria; Environmental source	GRAM-NEGATIVE BACTERIA; RISK-FACTORS; WATER; DRINKING	Background: Outbreaks of bloodstream infections (BSI) of nonfermenting bacteria are a critical issue and often associated with hospital environments. We experienced a long-lasting outbreak of Pseudomonas fluorescens BSI limited to a coronary care unit (CCU). Methods: We conducted a retrospective epidemiologic investigation and a case-control study for Pseudomonas fluorescens BSI from April 2011-J…	2017
Altindis, M; Demiray, T; Koroglu, M; Kik, U; Alagoz, AN; Ogutlu, A; Karabay, O	Comparison of Novel Blood Culture System DL-Bt112™ with BacT/Alert 3D™ by Using Clinical Samples	CLINICAL LABORATORY	bacteriological techniques; blood; blood stream infection; culture Media; Diagnostic; Reagent Kits	SEVERE SEPSIS; INFECTION; MEDIA	Background: Blood cultures are the main diagnostic laboratory tool to detect bloodstream infections. Many clinical microbiology laboratories utilize automated blood culture systems to isolate infectious agents from blood samples. The diagnostic performance and time-to-detection values of the novel automated blood culture system, DLBt112 (TM) (DL), was compared with BacT/Alert 3D (TM) (B3D) in thi…	2017
Heckel, M; Geissdörfer, W; Herbst, FA; Stiel, S; Ostgathe, C; Bogdan, C	Nasal carriage of methicillin-resistant Staphylococcus aureus (MRSA) at a palliative care unit: A prospective single service analysis	PLOS ONE		GRAM-NEGATIVE BACTERIA; INFECTION; PREVALENCE; EPIDEMIOLOGY; SURVEILLANCE; GERMANY; IMPACT	Background The emergence of multidrug-resistant bacterial microorganisms is a particular challenge for the health care systems. Little is known about the occurrence of methicillin-resistant Staphylococcus aureus (MRSA) and multidrug-resistant Gram-negative bacteria (MDRGNB) in patients of palliative care units (PCU). Aim The primary aim of this study was to determine the carriage of MRSA among pa…	2017
Zhao, JC; Zhang, BR; Shi, K; Zhang, X; Xie, CH; Wang, J; Yu, QH; Gao, XX; Hong, L; Yu, JA	Necrotizing soft tissue infection: clinical characteristics and outcomes at a reconstructive center in Jilin Province	BMC INFECTIOUS DISEASES	Necrotizing fasciitis; Surgical debridement; Treatment; Extremity	LABORATORY RISK INDICATOR; RESISTANT STAPHYLOCOCCUS-AUREUS; FASCIITIS; MORTALITY; LRINEC; PREDICTORS; MANAGEMENT; DIAGNOSIS; SCORE	Background: To investigate the clinical characteristics and treatment outcomes in necrotizing fasciitis (NF) patients in a reconstructive unit in northeastern China. Methods: Medical records of patients diagnosed with and treated for NF in the extremities from November 2013 to December 2016 were retrospectively reviewed. Demographic data, clinical presentation, duration of signs and symptoms, loc…	2017
Jose, J; Santhiya, K; Jayanthi, S; Ananthasubramanian, M	Insertion sequence based analysis of clinical isolates with NDM (blaNDM-1) resistance	INDIAN JOURNAL OF BIOTECHNOLOGY	Horizontal gene transfer; insertion sequence (IS); multidrug resistance; New Delhi metallo-beta-lactamase (NDM)	ESCHERICHIA-COLI STRAIN; GRAM-NEGATIVE BACTERIA; TERTIARY CARE CENTER; ACINETOBACTER-BAUMANNII; KLEBSIELLA-PNEUMONIAE; PSEUDOMONAS-AERUGINOSA; CARBAPENEM-RESISTANT; INDIA; ENTEROBACTERIACEAE; BLA(NDM-1)	New Delhi metallo-13-lactamase-1 (NDM-1), mostly carried by Gram negative Enterobacteriaceae, is one of the leading causes of healthcare associated infections worldwide. It is capable of inactivating all 13-lactam antibiotics except aztreonam and is encoded by the blaNDM-1 gene. The gene is reported to be located on bacterial chromosomes and plasmids, and transferred with the involvement of trans…	2017
Midan, DA; El Fotoh, WMMA; El Shalakany, AH	The potential role of incorporating real-time PCR and DNA sequencing for amplification and detection of 16S rRNA gene signatures in neonatal sepsis	JOURNAL OF MATERNAL-FETAL & NEONATAL MEDICINE	Neonates; sepsis; blood culture; 16S rRNA; real time PCR; sequencing	CLINICAL MICROBIOLOGY; BACTERIAL; IDENTIFICATION; BACTEREMIA; DIAGNOSIS; TOOL	Objectives: This study aimed to explore whether 16S rRNA gene amplification by real time PCR and sequencing could serve as genetic-based methods in rapid and accurate diagnosis of neonatal sepsis.Patients and methods: This case control study was conducted on 40 neonates suffering from sepsis like manifestations recruited from the neonatal intensive care unit of Menoufia university hospital over a…	2017
Herkel, T; Uvízl, R; Kolár, M; Sedláková, MH; Adamus, M; Doubravská, L; Gabrhelík, T; Pudova, V; Langová, K; Zazula, R; Rezác, T; Moravec, M; Cermák, P; Sevcík, P; Stasek, J; Sevcíková, A; Hanslianová, M; Turek, Z; Cerny, V; Paterová, P	Healthcare associated pneumonia in intensive care patients - optimal choice of initial empirical antimicrobial therapy: Results of a multicenter, observational study	ANESTEZIOLOGIE A INTENZIVNI MEDICINA	nosocomial infections; hospital acquired pneumonia; initial empirical antibiotic therapy; epidemiology; pneumonia	NOSOCOMIAL PNEUMONIA; EARLY-ONSET; DIAGNOSIS	Objective: This study aimed to obtain recent epidemiological data on hospital-acquired pneumonia (HAP) in intensive care patients and to determine adequate empirical antimicrobial therapy. Setting: Department of Anaesthesiology, Resuscitation and Intensive Care Medicine. Patients and methods: The prospective, multicenter, observational study assessed the spectrum of detected bacterial pathogens a…	2017
Marbou, WJT; Kuete, V	Bacterial resistance and immunological profiles in HIV-infected and non-infected patients at Mbouda AD LUCEM Hospital in Cameroon	JOURNAL OF INFECTION AND PUBLIC HEALTH	Bacterial resistance; C-reactive protein; Enteric infections; Immunological status; HIV; Mbouda		This study investigated the variations in some cells of the immune system, as well as the antibiotic resistance of the bacteria responsible for enteric infections among HIV+ patients compared to HIV - patients in Mbouda AD LUCEM Hospital, Cameroon. A cross-sectional study was performed from September 2014 to February 2015 in 67 human immunodeficiency virus (HIV)-seropositive (HIV+) and 37 HIV-ser…	2017
Mahmoudi, S; Mahzari, M; Banar, M; Pourakbari, B; Ashtiani, MTH; Mohammadi, M; Valian, SK; Mamishi, S	Antimicrobial resistance patterns of Gram-negative bacteria isolated from bloodstream infections in an Iranian referral paediatric hospital: A 5.5-year study	JOURNAL OF GLOBAL ANTIMICROBIAL RESISTANCE	Bloodstream infection; Gram-negative bacteria; Antibiotic resistance; Children; Iran	SERRATIA-MARCESCENS OUTBREAK; SUSCEPTIBILITY PATTERNS; RISK-FACTORS; CHILDREN; PATHOGEN; PROFILE; TEHRAN; AGENTS	Objectives: Bloodstream infections (BSIs) are a major cause of paediatric morbidity and mortality worldwide. This study describes the epidemiology and antimicrobial resistance of Gram-negative bacteria (GNB) from BSIs in children admitted to an Iranian paediatric hospital. Methods: Clinical and microbiological data of patients with positive blood cultures were collected from March 2011 to Septemb…	2017
Akhter, K; Dey, S; Mallik, AZ; Nandan, K; Sen, A; Biswas, PP; Kumar, D	BACTERIOLOGICAL AND MYCOLOGICAL PROFILE OF BURN WOUND INFECTION IN A TERTIARY CARE HOSPITAL IN KATIHAR, BIHAR	JOURNAL OF EVOLUTION OF MEDICAL AND DENTAL SCIENCES-JEMDS	Burns; Infections; Gram-Negative Bacilli; Gram-Positive Cocci		BACKGROUND Injuries secondary to severe burns rank among the most serious forms of trauma resulting in anatomic, physiologic, endocrinologic and immunologic stress, especially when burns involve more than 20% of Total Body Surface Area (TBSA). In patients surviving the initial burn and resuscitative phase, infections are a leading cause of mortality. The burnt surface is sterile immediately follo…	2017
Mirhoseini, SH; Nikaeen, M; Shamsizadeh, Z; Khanahmad, H	Hospital air: A potential route for transmission of infections caused by β-lactam-resistant bacteria	AMERICAN JOURNAL OF INFECTION CONTROL	Airborne; hospital; antibiotic-resistant bacteria; nosocomial infection; beta-lactam	STAPHYLOCOCCUS-AUREUS; ACINETOBACTER-BAUMANNII; DIFFERENT AREAS; METHICILLIN; CARE; PATHOGEN; SEQUENCE; HEALTH; SPREAD; UNIT	Background: The emergence of bacterial resistance to beta-lactam antibiotics seriously challenges the treatment of various nosocomial infections. This study was designed to investigate the presence of beta-lactam-resistant bacteria (BLRB) in hospital air. Methods: A total of 64 air samples were collected in 4 hospital wards. Detection of airborne bacteria was carried out using culture plates with…	2016
Timofte, D; Panzaru, CV; Maciuca, IE; Dan, M; Mare, AD; Man, A; Toma, F	Active surveillance scheme in three Romanian hospitals reveals a high prevalence and variety of carbapenamase-producing Gram-negative bacteria: a pilot study, December 2014 to May 2015	EUROSURVEILLANCE		ACINETOBACTER-BAUMANNII; BETA-LACTAMASES; PSEUDOMONAS-AERUGINOSA; OXA-48 CARBAPENEMASE; MULTIPLEX PCR; ENTEROBACTERIACEAE; EMERGENCE; SPREAD	We report the findings of an active surveillance scheme for detection of asymptomatic carriers with carbapenemase-producing Gram-negative bacteria (CP-GNB) in Romanian hospitals. During a pilot study from December 2014 to May 2015, faecal cultures were screened in three hospitals (two large, one mediumsize) for patients newly admitted to selected wards or inpatients transferred from other wards t…	2016
Malakootian, M; Gharghani, MA	Investigation of type and density of bio-aerosols in air samples from educational hospital wards of Kerman city, 2014	ENVIRONMENTAL HEALTH ENGINEERING AND MANAGEMENT JOURNAL	Bacteria; Fungal; Bio-aerosol; Hospital; Kerman		Background: Bio-aerosols in the air of hospital wards have an important role in the development of infections. It is important to make quantitative and qualitative estimations of microorganisms in the air of these wards as an index for environmental hygiene applicable to different hospital wards. The aim of the study was to investigate degrees of diversity and density of bio-aerosols in the educa…	2016
Ellis, C; Misir, A; Hui, C; Jabbour, M; Barrowman, N; Langill, J; Bowes, J; Slinger, R	Detection of respiratory viruses and bacteria in children using a twenty-two target reverse-transcription real-time PCR (RT-qPCR) panel	WORLD JOURNAL OF PEDIATRICS	bacterial infections; pediatric; polymerase chain reaction; respiratory infectious diseases; viral infections	VIRAL-INFECTIONS; RAPID DIAGNOSIS; HUMAN BOCAVIRUS; REDUCE; IMPACT; ASSAY	Rapid detection of the wide range of viruses and bacteria that cause respiratory infection in children is important for patient care and antibiotic stewardship. We therefore designed and evaluated a ready-to-use 22 target respiratory infection reverse-transcription real-time polymerase chain reaction (RT-qPCR) panel to determine if this would improve detection of these agents at our pediatric hos…	2016
Muchesa, P; Leifels, M; Jurzik, L; Barnard, TG; Bartie, C	Free-living amoebae isolated from a hospital water system in South Africa: a potential source of nosocomial and occupational infection	WATER SCIENCE AND TECHNOLOGY-WATER SUPPLY	Acanthamoeba; amoebal co-culture; free-living amoebae; nosocomial infections; T20 genotype	HARTMANNELLA-VERMIFORMIS; MYCOBACTERIUM-AVIUM; ACANTHAMOEBAE; KERATITIS; BACTERIA; GROWTH; HEAT	This study investigated the occurrence of free-living amoebae (FLA) in a public hospital in South Africa. A total of 97 water and biofilm samples from the municipal water inlet of the hospital, theatres, theatre sterilization service unit, central sterilization service unit, endoscopy/gastroscopy unit, intensive care unit and the renal unit were collected and examined for the presence of FLA usin…	2016
Siow, WT; Koay, ESC; Lee, CK; Lee, HK; Ong, V; Ngerng, WJ; Lim, HF; Tan, A; Tang, JWT; Phua, J	The Use of Polymerase Chain Reaction Amplification for the Detection of Viruses and Bacteria in Severe Community-Acquired Pneumonia	RESPIRATION	Intensive care unit; Microbiology; Infection; Mortality; Tropical climate	REAL-TIME PCR; RESPIRATORY VIRUSES; MULTIPLEX PCR; DIAGNOSTIC-TESTS; VIRAL-INFECTION; ADULT PATIENTS; ETIOLOGY; INFLUENZA; IDENTIFICATION; CULTURE	Background: Pathogens are often not identified in severe community-acquired pneumonia (CAP), and the few studies using polymerase chain reaction (PCR) techniques for virus detection are from temperate countries. Objective: This study assesses if PCR amplification improves virus and bacteria detection, and if viral infection contributes to mortality in severe CAP in a tropical setting, where respi…	2016
Avilés, C; Betancour, P; Velasco, CL; Godoy, R; Barthel, E; Martinez, F	Factors associated with extended-spectrum betalactamases-producing organisms among patients with urinary tract infections: a prospective cohort study	REVISTA CHILENA DE INFECTOLOGIA	Urinary tract infection; extended-spectrum betalactamases; risk factors	BLOOD-STREAM INFECTIONS; GRAM-NEGATIVE BACILLI; ESCHERICHIA-COLI; RISK-FACTORS; KLEBSIELLA-PNEUMONIAE; ANTIMICROBIAL RESISTANCE; CEPHALOSPORIN USE; ENTEROBACTERIACEAE; IMPACT; MORTALITY	Background: Urinary tract infections (UTIs) caused by extended-spectrum betalactamases (ESBL) are an increasingly common problem. Aim: To develop an association model to allow an early detection of ESBL-producing microorganisms. Methods: A prospective observational cohort study was undertaken among patients admitted with a diagnosis of culture-proven UTI to the Internal Medicine Ward of the Hospi…	2016
Ghebremedhin, B; Halstenbach, A; Smiljanic, M; Kaase, M; Ahmad-Nejad, P	MALDI-TOF MS based carbapenemase detection from culture isolates and from positive blood culture vials	ANNALS OF CLINICAL MICROBIOLOGY AND ANTIMICROBIALS	MALDI-TOF MS; Carbapenemases; Acinetobacter baumannii; MDR Gram-negative bacteria; Hydrolysis	DESORPTION IONIZATION-TIME; FLIGHT MASS-SPECTROMETRY; RAPID DETECTION; MINISEQUENCING METHOD; RESISTANCE; ENTEROBACTERIACEAE; IDENTIFICATION; TECHNOLOGY; STRAINS; IMPACT	Background: Antibiotic resistance in bacteria leads to massive health problems. Incidence of carbapenem and multidrug resistance in Gram-negative bacteria are increasing globally and turn out to be a very urgent challenge in health care. Resistant bacteria play an important clinical role during hospital outbreaks as well as in sepsis. Rapid diagnostic tests are necessary to provide immediate info…	2016
Zahra, NM; Rampazzo, RCP; Leite, KK; Schluga, PHC; Cereda, M; Bianchessi, M; Morello, LG; Krieger, MA; Costa, ADT	Advances to Bordetella pertussis Diagnosis: Adapting a Real Time PCR to a Lab-on-chip Platform	2016 31ST SYMPOSIUM ON MICROELECTRONICS TECHNOLOGY AND DEVICES (SBMICRO)	silicon chip; molecular diagnostics; point of care; pertussis; qPCR	INFECTIONS; ASSAY	Whooping cough is caused by the bacteria Bordetella pertussis and, despite massive global vaccination campaigns, still poses a threat to infants, to elders well as to immunocompromised patients. In this work, we used a silicon lab-on-chip and a portable, lightweight thermocycler to develop a molecular-based detection reaction for two B. pertussis genes (IS481 and ptxS1). Each bacterial target is …	2016
Wassef, M; Abdelhaleim, M; Ghaith, D; El-Mahdy, Y	Emerging New Delhi metallo-β-lactamase-1-type-producing Gram-negative bacteria isolated from Cairo University Pediatric Hospital, Cairo, Egypt	JOURNAL OF GLOBAL ANTIMICROBIAL RESISTANCE	NDM-1-type; Carbapenemase; MIC; Etest; MBL; Imipenem	KLEBSIELLA-PNEUMONIAE; BETA-LACTAMASES; CARBAPENEMASES; PREVALENCE	New Delhi metallo-beta-lactamase (NDM) compromises the efficacy of almost all beta-lactam antibiotics, including carbapenems. This study aimed to screen for the bla(NDM-1-type) gene and NDM-1-type carbapenemase production among Gram-negative bacteria in Cairo University Pediatric Hospital (Cairo, Egypt). Among 382 Gram-negative clinical isolates collected over the period October 2013 to May 2014,…	2016
Pulcrano, G; Pignanelli, S; Vollaro, A; Esposito, M; Iula, VD; Roscetto, E; Soriano, AA; Catania, MR	Isolation of Enterobacter aerogenes carrying blaTEM-1 and blaKPC-3 genes recovered from a hospital Intensive Care Unit	APMIS	KPC gene; carbapenem resistence; nosocomial infection; surveillance	LACTAMASE-PRODUCING ENTEROBACTERIACEAE; KLEBSIELLA-PNEUMONIAE ST512; MOLECULAR-MECHANISMS; CARBAPENEMASE; RESISTANCE; DISSEMINATION; EPIDEMIOLOGY; SURVEILLANCE; ACQUISITION; EMERGENCE	Enterobacter aerogenes has recently emerged as an important hospital pathogen. In this study, we showed the emergence of E. aerogenes isolates carrying the bla(KPC) gene in patients colonized by carbapenem-resistant Klebsiella pneumoniae strains. Two multiresistant E. aerogenes isolates were recovered from bronchial aspirates of two patients hospitalized in the Intensive Care Unit at the Santa Ma…	2016
Chaudhary, HT; Hasnain, S	Can dipstick method help in bacterial detection in platelet bags? A tertiary care hospital's blood bank review	JOURNAL OF THE PAKISTAN MEDICAL ASSOCIATION	Platelets; Glucose; Bacteria	RED-CROSS EXPERIENCE; TRANSFUSION REACTIONS; CONTAMINATION; SURVEILLANCE; COMPONENTS; CULTURE; DONORS; RISK	Objective: To find the bacterial and biochemical details of bags used in platelet transfusion. Methods: This cross-sectional study was carried out at a tertiary care hospital of Saudi Arabia (King Khalid Hospital, Najran) from January to June 2012, and comprised platelet bags. Samples for bacterial detection and biochemical testing of platelet bags were taken from blood bags on Day 6 of donation.…	2016
Baran, I; Aksu, N	Phenotypic and genotypic characteristics of carbapenem-resistant Enterobacteriaceae in a tertiary-level reference hospital in Turkey	ANNALS OF CLINICAL MICROBIOLOGY AND ANTIMICROBIALS	Enterobacteriaceae; Carbapenem resistance; OXA-48; NDM-1; VIM; Modified Hodge test; Multiplex PCR; Multidrug resistance	METALLO-BETA-LACTAMASE; KLEBSIELLA-PNEUMONIAE; OXA-48 CARBAPENEMASE; SPREAD; ISTANBUL	Background: Enterobacteriaceae are among the most common pathogens that are responsible for serious community-acquired, hospital-acquired, and health-care associated infections. The emergence and spread of carbapenem-resistant Enterobacteriaceae (CRE) have become an increasing concern for healthcare services worldwide. Infections caused by these bacteria have been associated with significant morb…	2016
Johannesen, K; Dessau, R; Heltberg, O; Bodtger, U	Bad news itself or just the messenger? The high mortality of Fusobacterium spp. infections is related to disseminated malignancy and other comorbidities	EUROPEAN CLINICAL RESPIRATORY JOURNAL	Fusobacterium infections; bacteria; anaerobic; bacteraemia; empyema; mortality	NECROPHORUM INFECTIONS; LEMIERRES SYNDROME; OUTCOMES; EPIDEMIOLOGY; EMPYEMA	Background: Fusobacterium species are pleomorphic, obligate anaerobic gram-negative bacilli. They are difficult to culture and grow slowly. If antibiotic treatment is initiated prior to blood cultures, the bacteria might evade detection. This is a comprehensive report on mortality in non-bacteraemia fusobacterial infection. Methods: Data were collected retrospectively in adults having a positive …	2016
Vanegas, JM; Parra, OL; Jiménez, JN	Molecular epidemiology of carbapenem resistant gram-negative bacilli from infected pediatric population in tertiary - care hospitals in Medellin, Colombia: an increasing problem	BMC INFECTIOUS DISEASES	Gram-negative bacilli; Carbapenem resistance; Infections in children	KLEBSIELLA-PNEUMONIAE ST14; BETA-LACTAMASE; RISK-FACTORS; ANTIMICROBIAL RESISTANCE; MULTIPLEX PCR; ENTEROBACTERIACEAE; OUTBREAK; SURVEILLANCE; DISSEMINATION; COLONIZATION	Background: Gram-negative bacilli are a cause of serious infections in the pediatric population. Carbapenem are the treatment of choice for infections caused by multidrug-resistant Gram-negative bacilli, but the emergence of carbapenem resistance has substantially reduced access to effective antimicrobial regimens. Children are a population vulnerable to bacterial infections and the emergence of …	2016
Gadsby, NJ; Russell, CD; McHugh, MP; Mark, H; Morris, AC; Laurenson, IF; Hill, AT; Templeton, KE	Comprehensive Molecular Testing for Respiratory Pathogens in Community-Acquired Pneumonia	CLINICAL INFECTIOUS DISEASES	community-acquired pneumonia; bacterial load; viral; molecular testing; PCR	REAL-TIME PCR; POLYMERASE-CHAIN-REACTION; CARE-ASSOCIATED PNEUMONIA; STREPTOCOCCUS-PNEUMONIAE; RAPID DETECTION; REQUIRING HOSPITALIZATION; PNEUMOCOCCAL PNEUMONIA; HAEMOPHILUS-INFLUENZAE; QUANTITATIVE DETECTION; SPUTUM SAMPLES	Background. The frequent lack of a microbiological diagnosis in community-acquired pneumonia (CAP) impairs pathogen-directed antimicrobial therapy. This study assessed the use of comprehensive multibacterial, multiviral molecular testing, including quantification, in adults hospitalized with CAP. Methods. Clinical and laboratory data were collected for 323 adults with radiologically-confirmed CAP…	2016
Mohammed, Y; Gadzama, GB; Zailani, SB; Aboderin, AO	Characterization of Extended-Spectrum Beta-lactamase from Escherichia coli and Klebsiella Species from North Eastern Nigeria	JOURNAL OF CLINICAL AND DIAGNOSTIC RESEARCH	Cephalosporins; Resistance; Enzymes; ESBL	CTX-M; PNEUMONIAE	Introduction: Resistance to antimicrobials has become a serious global health concern complicating treatment strategies and increasing health-care costs. The extended-spectrum beta-lactamase producing bacteria stand out as bacteria of great epidemic concern among Gram negative bacilli. Control and appropriate interventions for antimicrobial resistance depend on effective surveillance and knowledg…	2016
Ravikant; Kumar, P; Ranotkar, S; Zutshi, S; Lahkar, M; Phukan, C; Saikia, KK	Prevalence and identification of extended spectrum β-lactamases (ESBL) in Escherichia coli isolated from a tertiary care hospital in North-East India	INDIAN JOURNAL OF EXPERIMENTAL BIOLOGY	CTX-M; Drug resistance; MDR; Public health; SHV; TEM	URINARY-TRACT-INFECTION; NDM-1-PRODUCING KLEBSIELLA-PNEUMONIAE; GRAM-NEGATIVE BACILLI; TRENDS SMART PROGRAM; ANTIMICROBIAL RESISTANCE; ANTIBIOTIC-RESISTANCE; MULTIDRUG-RESISTANT; MYSTIC PROGRAM; ENTEROBACTERIACEAE; SUSCEPTIBILITY	Extended-spectrum beta-lactamases (ESBLs) are rapidly evolving group of beta-lactamase enzymes produced by the Gram negative bacteria. In this study, we determined the antimicrobial sensitivity pattern of Escherichia coli isolates and prevalence of TEM, SHV and CTX-M genes in ESBL positive E. coli isolated from the patients admitted to a tertiary care hospital in North-East India. A total of 85 m…	2016
Bhat, BV; Prasad, P; Kumar, VBR; Harish, BN; Krishnakumari, K; Rekha, A; Manjunath, G; Adhisivam, B; Shruthi, B	Syndrome Evaluation System (SES) versus Blood Culture (BACTEC) in the Diagnosis and Management of Neonatal Sepsis - A Randomized Controlled Trial	INDIAN JOURNAL OF PEDIATRICS	Neonatal; Sepsis; Polymerase chain reaction; Syndrome evaluation system (SES)	POLYMERASE-CHAIN-REACTION; IN-SITU HYBRIDIZATION; INTENSIVE-CARE-UNIT; REAL-TIME PCR; PATHOGENS; INFECTIONS; IMPACT; BACTEREMIA; MORTALITY; INFANTS	Objective To compare the clinical outcome of a multiplex polymerase chain reaction (PCR) based molecular diagnostic method - Syndrome Evaluation System (SES) directed treatment strategy vs. standard of care (blood culture) directed treatment strategy for neonatal sepsis. Methods This randomized controlled trial (RCT) included 385 neonates with sepsis who were randomized into two groups - SES and …	2016
Guy, M; Vanhems, P; Dananché, C; Perraud, M; Regard, A; Hulin, M; Dauwalder, O; Bertrand, X; Crozon-Clauzel, J; Floccard, B; Argaud, L; Cassier, P; Bénet, T	Outbreak of pulmonary Pseudomonas aeruginosa and Stenotrophomonas maltophilia infections related to contaminated bronchoscope suction valves, Lyon, France, 2014	EUROSURVEILLANCE		MYCOBACTERIUM-TUBERCULOSIS; FLEXIBLE BRONCHOSCOPE; CHELONAE; LESSONS	In April 2014, pulmonary Pseudomonas aeruginosa and Stenotrophomonas maltophilia co-infections potentially related to bronchoscopic procedures were identified in the intensive care units of a university hospital in Lyon, France. A retrospective cohort of 157 patients exposed to bronchoscopes from 1 December 2013 to 17 June 2014 was analysed. Environmental samples of suspected endoscopes were cult…	2016
Qian, Y; Li, Q; Liu, QZ; Chen, ML; Chen, H; Zou, N	Investigation and control of a suspected nosocomial outbreak of pan-drug resistant Acinetobacter baumannii in an intensive care unit	OPEN MEDICINE	Acinetobacter baumannii; Bacterial drug resistance; Epidemiology; Intensive care unit; Nosocomial infections; Pan-drug resistance		Acinetobacter baumannii, a non-fermenting Gram-negative bacterium, is a common pathogen in intensive care units (ICU) that is easily spread through contact and can cause nosocomial outbreaks. This study investigated the risk factors associated with outbreaks of pan-drug resistant Acinetobacter baumannii (PDR-Ab) infection by studying a suspected nosocomial outbreak in a comprehensive ICU in a tea…	2016
Hos, NJ; Wiegel, P; Fischer, J; Plum, G	Comparative evaluation of two fully-automated real-time PCR methods for MRSA admission screening in a tertiary-care hospital	EUROPEAN JOURNAL OF CLINICAL MICROBIOLOGY & INFECTIOUS DISEASES		STAPHYLOCOCCUS-AUREUS; RAPID DETECTION; ASSAY; BACTEREMIA; SPECIMENS; MORTALITY; STRAINS; SAMPLES; COSTS	We evaluated two fully-automated real-time PCR systems, the novel QIAGEN artus MRSA/SA QS-RGQ and the widely used BD MAX MRSA assay, for their diagnostic performance in MRSA admission screening in a tertiary-care university hospital. Two hundred sixteen clinical swabs were analyzed for MRSA DNA using the BD MAX MRSA assay. In parallel, the same specimens were tested with the QIAGEN artus MRSA/SA …	2016
Derese, B; Kedir, H; Teklemariam, Z; Weldegebreal, F; Balakrishnan, S	Bacterial profile of urinary tract infection and antimicrobial susceptibility pattern among pregnant women attending at Antenatal Clinic in Dil Chora Referral Hospital, Dire Dawa, Eastern Ethiopia	THERAPEUTICS AND CLINICAL RISK MANAGEMENT	pregnant; urinary tract infections; multidrug resistant; antenatal; Dil Chora; Dire Dawa	PREVALENCE	Purpose: The aim of this study was to determine the bacterial profile of urinary tract infection (UTI) and antimicrobial susceptibility pattern among pregnant women attending at antenatal clinic in Dil Chora Referral Hospital, Dire Dawa, Eastern Ethiopia. Patients and methods: An institutional-based cross-sectional study was conducted from February 18, 2015 to March 25, 2015. Clean-catch midstrea…	2016
Ghosh, MK; Saha, B; Bhattacharyya, I; Chakraborty, M; Roy, D; Hoque, MS	A STUDY ON AETIOLOGICAL AGENTS OF LRTI WITH SPECIAL EMPHASIS ON DRUG SENSITIVITY PATTERN OF ISOLATED BACTERIA AND INCIDENCE OF PNEUMOCYSTIS CARINII PNEUMONIA	JOURNAL OF EVOLUTION OF MEDICAL AND DENTAL SCIENCES-JEMDS	Lower respiratory tract infections; Pneumocystis carinii; HIV; Pneumonia; Antibiotic; Sputum	RESPIRATORY-TRACT INFECTIONS; BRONCHOALVEOLAR LAVAGE; DIAGNOSIS; PROPHYLAXIS; PATHOGENS; ERA	Lower Respiratory Tract Infections (LRTIs) are important causes of morbidity and mortality for all age groups both in the hospital as well as in the community. Though international guidelines are available for treating bacterial LRTI they have not been validated very much in the Indian scenario. Scarce local information is available regarding aetiological agents of LRTI and their antibiotic sensi…	2016
da Silva, LCA; Pessoa, DAD; Maia, LA; Matos, RAT; Macêdo, MMD	Systemic Infection by Pseudomonas aeruginosa in a Dog	ACTA SCIENTIAE VETERINARIAE	microbiological; internal medicine; infections; Veterinary Medicine	GRAM-NEGATIVE BACTERIA; BETA-LACTAMASES; RESISTANCE; STRAINS	Background: Pseudomonas aeruginosa is an important pathogen frequently associated with nosocomial infections affecting mainly immunosuppressed patients. In Veterinary Medicine, infections caused by P. aeruginosa are becoming increasingly frequent; infections are related to intrinsic or acquired resistance mechanisms, which limit the choice of effective agents. Case: This study describes the case …	2016
Elantamilan, D; Lyngdoh, VW; Khyriem, AB; Rajbongshi, J; Bora, I; Devi, ST; Bhattacharyya, P; Barman, H	Comparative evaluation of the role of single and multiple blood specimens in the outcome of blood cultures using BacT/ALERT 3D (automated) blood culture system in a tertiary care hospital	INDIAN JOURNAL OF CRITICAL CARE MEDICINE	BacT; ALERT 3D; bacteremia; blood stream infections; FA plus; number of samples	BACTEREMIA; ADULTS	Introduction: Bloodstream infection (BSI) is a leading cause of mortality in critically ill patients. The mortality directly attributable to BSI has been estimated to be around 16% and 40% in general hospital population and Intensive Care Unit (ICU) population, respectively. The detection rate of these infections increases with the number of blood samples obtained for culture. The newer continuou…	2016
Bhumbla, U; Gupta, P; Mathur, DR; Gyaneshwari	CURRENT TRENDS IN MICROBIAL PROFILE AND RESISTANCE PATTERN IN CSOM IN A SEMIURBAN HOSPITAL OF SOUTHERN INDIA	JOURNAL OF EVOLUTION OF MEDICAL AND DENTAL SCIENCES-JEMDS	CSOM; MRSA; ESBL		BACKGROUND Infections of the middle ear space and their sequelae have plagued mankind from the beginning of time. Since there are variations in aetiological agents and their antimicrobial susceptibility patterns regionally. It is pertinent to carry out ongoing studies to observe the profile of aetiological agents and their resistance patterns. This would help clinicians to prescribe appropriate a…	2016
Flores-Carrero, A; Labrador, I; Paniz-Mondolfi, A; Peaper, DR; Towle, D; Araque, M	Nosocomial outbreak of extended-spectrum β-lactamase-producing Enterobacter ludwigii co-harbouring CTX-M-8, SHV-12 and TEM-15 in a neonatal intensive care unit in Venezuela	JOURNAL OF GLOBAL ANTIMICROBIAL RESISTANCE	Enterobacter ludwigii; Sepsis; ESBL; Neonate; Outbreak	KLEBSIELLA-PNEUMONIAE; 1ST REPORT; CLOACAE; INFECTIONS	Enterobacter spp. have emerged as an important group of pathogens linked to outbreaks in neonatal intensive care units (NICUs), usually involving strains expressing extended-spectrum beta-lactamases (ESBLs). The aim of this study was to describe the first nosocomial bloodstream infection outbreak caused by Enterobacter ludwigii co-harbouring CTX-M-8, SHV-12 and TEM-15 in a NICU in a Venezuelan ho…	2016
Javed, N; Ali, FA; Subhani, H; Manzur, F	Study of Bacteria isolated from Urinary Tract Infections and to Determine their Susceptibility for Antibiotics at a Teaching Hospital	PAKISTAN JOURNAL OF MEDICAL & HEALTH SCIENCES	UTI; pathogens; antibiotics		Aim: To determine the pathogens causing urinary tract infections and susceptibility to antibiotics. Methods: In this study, 300 patients with clinical symptoms and suspected UTI were sampled. Using the method of Clean-Catch, urine samples were collected from patients admitted to the Medical Ward at Aziz Fatima Hospital, Faisalabad from 1st January 2012 until 31st December 2012. Samples were sent …	2015
Vaishali, G; Renu, B; Vaishali, D	Different Methods of Detection of Metallobetalactamase Producing Pseudomonas Aeruginosa from Tertiary Care Center	INTERNATIONAL JOURNAL OF SCIENTIFIC STUDY	Metallobetalactamases; Modified Hodge test; Pseudomonas aeruginosa		Background: Metallobetalactamase (MBL) producing Pseudomonas aeruginosa have emerged which have the capacity to hydrolyze virtually all beta lactam agents including the carbapenems. Detection of P. aeruginosa is crucial for optimal treatment of patients and control the spread of resistant bacteria in the hospital scenario. Aim: The present study was undertaken to evaluate the various techniques f…	2015
Ommi, D; Hashemian, SM; Tajbakhsh, E; Khamesipour, F	Molecular detection and antimicrobial resistance of Aeromonas from houseflies (Musca domestica) in Iran	REVISTA MVZ CORDOBA	Pathogens; locations; Polymerase chain reaction; resistant; seasons (Source: CAB)	CAMPYLOBACTER INFECTION; SEASONALITY	Objective. This study aimed to report the molecular detection and antimicrobial resistance of Aeromonas among houseflies (Musca domestica) in Shahrekord and Isfahan provinces of Iran. Materials and methods. Flies were caught from household kitchens, cattle farms, animal hospitals, human hospitals, slaughter house and poultry farms and put in collection separate sterile tubes. Isolation was accomp…	2015
Aghnatios, R; Drancourt, M	Colonization of Hospital Water Networks by Gemmata massiliana, a New Planctomycetes Bacterium	CURRENT MICROBIOLOGY		INFECTIONS; MICROORGANISMS; PNEUMONIA	Planctomycetes have been isolated from various hydric environments. These fastidious bacteria are overlooked by routine 16S rRNA gene-based PCR detection in hospital laboratories, and their presence has not been documented in the health-care environment. Using a specific culture protocol, we recently isolated a new, non-filterable Planctomycetes species, Gemmata massiliana, from one hospital wate…	2015
Wei, L; Liu, W; Zhang, XA; Liu, EM; Wo, Y; Cowling, BJ; Cao, WC	Detection of Viral and Bacterial Pathogens in Hospitalized Children With Acute Respiratory Illnesses, Chongqing, 2009-2013	MEDICINE		COMMUNITY-ACQUIRED PNEUMONIA; SYNCYTIAL VIRUS; STREPTOCOCCUS-PNEUMONIAE; HUMAN METAPNEUMOVIRUS; YOUNG-CHILDREN; RHINOVIRUS INFECTION; SYSTEMATIC ANALYSIS; EPITHELIAL-CELLS; DISEASE SEVERITY; TRACT INFECTIONS	Acute respiratory infections (ARIs) cause large disease burden each year. The codetection of viral and bacterial pathogens is quite common; however, the significance for clinical severity remains controversial. We aimed to identify viruses and bacteria in hospitalized children with ART and the impact of mixed detections. Hospitalized children with ART aged <= 16 were recruited from 2009 to 2013 a…	2015
Kaye, KS; Pogue, JM	Infections Caused by Resistant Gram-Negative Bacteria: Epidemiology and Management	PHARMACOTHERAPY	gram-negative bacteria; multidrug resistance; carbapenemase; extended-spectrum beta-lactamase; ceftolozane; avibactam	BLOOD-STREAM INFECTIONS; IN-VITRO ACTIVITY; LACTAMASE-PRODUCING ENTEROBACTERIACEAE; COMPLICATED INTRAABDOMINAL INFECTIONS; URINARY-TRACT-INFECTIONS; SPECTRUM BETA-LACTAMASES; MULTIDRUG-RESISTANT; PSEUDOMONAS-AERUGINOSA; CARBAPENEM-RESISTANT; EXTENDED-SPECTRUM	Infections caused by resistant gram-negative bacteria are becoming increasingly prevalent and now constitute a serious threat to public health worldwide because they are difficult to treat and are associated with high morbidity and mortality rates. In the United States, there has been a steady increase since 2000 in rates of extended-spectrum beta-lactamase-producing Enterobacteriaceae, carbapene…	2015
Flores-Pérez, A; Gayosso-Vázquez, C; Alcántar-Curiel, MD; Arzate-Barbosa, P; Alpuche-Aranda, C; Arredondo-García, JL	Sulfhydryl variable-5 extended spectrum β-lactamase in nosocomial enteric bacteria causing sepsis in mexican children	ACTA PEDIATRICA DE MEXICO	SHV-5; extended-spectrum beta-lactamase; Klebsiella pneumoniae; Serratia marcescens	BLOOD-STREAM INFECTIONS; FIELD GEL-ELECTROPHORESIS; KLEBSIELLA-PNEUMONIAE; SERRATIA-MARCESCENS; ESCHERICHIA-COLI; RISK-FACTORS; SHV-5; OUTBREAK; RESISTANCE; PLASMIDS	Introduction: Enteric bacteria causing nosocomial infections are often resistant to third-generation cephalosporins due to the production of extended-spectrum beta-lactamases (ESBLs). Objective: To describe and characterize the ESBLs pattern present in Klebsiella pneumoniae and Serratia marcescens strains, isolated as causative of nosocomial sepsis in pediatric patients at Instituto Nacional de P…	2015
Namvar, AE; Khodaei, F; Bijari, A; Lari, AR	Detection of integrons and Staphylococcal Cassette Chromosome (SCCmec) types in Staphylococcus aureus isolated from burn and non-burn patients	INTERNATIONAL JOURNAL OF HEALTH SCIENCES-IJHS	MRSA; Integron; mecA gene; SCCmec types	METHICILLIN-RESISTANT; MEC TYPE; COMMUNITY; EPIDEMIOLOGY; CCR	Background: Methicillin Resistant Staphylococcus aureus (MRSA) strains have been recognized as an important reason of infections in health care units. Integrons role in antibiotic resistance box gene transfer has been well recognized which are found in Gram positive bacteria. Objective: The aim of this study was analyzed of SCCmec typing and determine of integron classes in burn and non-burn spec…	2015
Hübner, C; Hübner, NO; Wegner, C; Flessa, S	Impact of different diagnostic technologies for MRSA admission screening in hospitals - a decision tree analysis	ANTIMICROBIAL RESISTANCE AND INFECTION CONTROL	Admission screening; Point-of-care; Hospital; Cost; Decision tree analysis; Methicillin-resistant Staphylococcus aureus	RESISTANT STAPHYLOCOCCUS-AUREUS; TRANSMISSION; COSTS; COLONIZATION; PRECAUTIONS; INFECTION; GERMANY; UNIT	Background: Hospital infections with multiresistant bacteria, e.g., Methicillin-resistant Staphylococcus aureus (MRSA), cause heavy financial burden worldwide. Rapid and precise identification of MRSA carriage in combination with targeted hygienic management are proven to be effective but incur relevant extra costs. Therefore, health care providers have to decide which MRSA screening strategy and…	2015
Rohde, GGU; Koch, A; Welte, T	Randomized double blind placebo-controlled study to demonstrate that antibiotics are not needed in moderate acute exacerbations of COPD - The ABACOPD Study	BMC PULMONARY MEDICINE		OBSTRUCTIVE PULMONARY-DISEASE; RESPIRATORY-TRACT INFECTIONS; THERAPY; QUALITY; VIRUSES	Background: Antibiotic-resistant strains of pathogenic bacteria are increasingly prevalent in hospitals and the community. Acute exacerbations of COPD (AE-COPD) often result in administration of antibiotics although more than half of exacerbations are associated with detection of respiratory viruses and potentially pathogenic bacteria can only be detected in 20-30% of cases. There is a paucity of…	2015
Selim, HS; Abaza, AF	Microbial contamination of mobile phones in a health care setting in Alexandria, Egypt	GMS HYGIENE AND INFECTION CONTROL	mobile phones; bacterial contamination; hand hygiene; MRSA; ESBL		Aim: This study aimed at investigating the microbial contamination of mobile phones in a hospital setting. Methods: Swab samples were collected from 40 mobile phones of patients and health care workers at the Alexandria University Students' Hospital. They were tested for their bacterial contamination at the microbiology laboratory of the High Institute of Public Health. Quantification of bacteria…	2015
Gane, BD; Natarajan, P; Hiremath, PB	DISTRIBUTION OF ESCHAR IN CHILDREN WITH SCRUB TYPHUS	JOURNAL OF EVOLUTION OF MEDICAL AND DENTAL SCIENCES-JEMDS	Scrub typhus; Eschar; Orientia tsutsugamushi; Distribution		Scrub typhus is caused by an intracellular bacterium, Orientia tsutsugamushi. It causes a disseminated vasculitic and perivascular inflammatory lesions. These lead to significant vascular leakage and end-organ injury. Eschar is the site of inoculation. It is painless and non-pruritic. It is a useful indicator of the disease. We studied the scrub typhus children with eschar to describe its distrib…	2015
Rodriguez-Villalobos, H; Glupczynski, Y	Emergence and dissemination of multi-resistant Gram negative Enterobacteriaceae: lessons to be learnt from local and national surveillance programs in Belgium	ACTA CLINICA BELGICA	ESBL; surveillance; antibiotic resistance; Belgium; multi-resistance; Enterobacteriaceae; carbapenemase	ESCHERICHIA-COLI; KLEBSIELLA-PNEUMONIAE; KPC-2 CARBAPENEMASE; BETA-LACTAMASES; CLONE; HOSPITALS; ST131; RESISTANCE; OUTBREAK	Infections caused by multi drug resistant bacteria (MDRB) constitutes an international health care problem. Since the year 2000, a longitudinal surveillance programme (LSP) and two multicentric surveys (100 hospitals, 826 isolates) were performed to monitor the emergence of MDRB in Belgium. The implementation of a LSP detected the emergence and spread of new types of ESBLs (CTX-M), mostly among c…	2015
Warhurst, G; Maddi, S; Dunn, G; Ghrew, M; Chadwick, P; Alexander, P; Bentley, A; Moore, J; Sharman, M; Carlson, GL; Young, D; Dark, P	Diagnostic accuracy of SeptiFast multi-pathogen real-time PCR in the setting of suspected healthcare-associated bloodstream infection	INTENSIVE CARE MEDICINE	Healthcare-associated infection; Bloodstream infection; Sepsis; Real-time PCR; Diagnostic accuracy	PREVALENCE; BACTEREMIA; CULTURE; VOLUME	SeptiFast is a real-time PCR assay which targets ribosomal DNA sequences of bacteria and fungi, enabling detection and identification of the commonest pathogens in blood within a few hours, including those acquired in healthcare settings. We report here the first detailed assessment of SeptiFast that focuses on healthcare-associated bloodstream infections which develop during routine critical car…	2015
Lavakhamseh, H; Mohajeri, P; Rouhi, S; Shakib, P; Ramazanzadeh, R; Rasani, A; Mansouri, M	Multidrug-Resistant Escherichia coli Strains Isolated from Patients Are Associated with Class 1 and 2 Integrons	CHEMOTHERAPY	Integrons; Multidrug resistance; Escherichia coli	ANTIBIOTIC-RESISTANCE; PREVALENCE; BACTERIA; ENTEROBACTERIACEAE; INFECTIONS; DIVERSITY; PATTERNS; GENES	Background: Escherichia coli isolates displaying multidrug-resistance (MDR) are a major health care problem that results in mortality and morbidity. Integrons are DNA elements in E.coli that are related to antibiotic resistance. The aim of this study was to determine class 1 and 2 integrons and MDR in E. coli isolates obtained from patients in two Sanandaj hospitals, located in Iran. Materials an…	2015
Voronina, OL; Kunda, MS; Ryzhova, NN; Aksenova, EI; Semenov, AN; Lasareva, AV; Amelina, EL; Chuchalin, AG; Lunin, VG; Gintsburg, AL	The Variability of the Order Burkholderiales Representatives in the Healthcare Units	BIOMED RESEARCH INTERNATIONAL		SP-NOV; GEN-NOV; CYSTIC-FIBROSIS; PURPLE BACTERIA; PHYLOGENY; CEPACIA	Background and Aim. The order Burkholderiales became more abundant in the healthcare units since the late 1970s; it is especially dangerous for intensive care unit patients and patients with chronic lung diseases. The goal of this investigation was to reveal the real variability of the order Burkholderiales representatives and to estimate their phylogenetic relationships. Methods. 16S rDNA and ge…	2015
Hans, R; Bisht, D; Agarwal, R; Irfan, M	PHENOTYPIC DETECTION OF MBL, AMPC BETA-LACTAMASE AND CARBAPENEMASES IN MULTI DRUG RESISTANT ISOLATES OF ACINETOBACTER BAUMANNII	INTERNATIONAL JOURNAL OF MEDICAL RESEARCH & HEALTH SCIENCES	Acinetobacter; Modified Hodge Test; Metallo-beta-lactamse; AmpC beta-lactamse		Introduction: Acinetobacter baumannii is one of the major pathogens causing nosocomial infections due to emergence of resistance to various antimicrobial agents. Resistance due to antimicrobial degrading enzymes is now a worldwide problem and a major reason of concern for the treating physicians. Keeping this in mind, the present study was designed to isolate Acinetobacter baumannii and study var…	2015
Inchai, J; Pothirat, C; Liwsrisakun, C; Deesomchok, A; Kositsakulchai, W; Chalermpanchai, N	Ventilator-Associated Pneumonia: Epidemiology and Prognostic Indicators of 30-Day Mortality	JAPANESE JOURNAL OF INFECTIOUS DISEASES		RISK-FACTORS; SEVERITY; OUTCOMES; THERAPY; IMPACT; SOFA; ICU	We conducted a retrospective cohort study in the medical intensive care unit of Chaing Mai University Hospital to describe the epidemiology of ventilator-associated pneumonia (YAP) and identify prognostic indicators of 30-day YAP mortality. A total of 621 patients diagnosed with YAP between January 2005 and December 2011 were included. The overall 30-day mortality rate was 44.4%. The major causat…	2015
Jain, S; Self, WH; Wunderink, RG; Fakhran, S; Balk, R; Bramley, AM; Reed, C; Grijalva, CG; Anderson, EJ; Courtney, DM; Chappell, JD; Qi, C; Hart, EM; Carroll, F; Trabue, C; Donnelly, HK; Williams, DJ; Zhu, Y; Arnold, SR; Ampofo, K; Waterer, GW; Levine, M; Lindstrom, S; Winchell, JM; Katz, JM; Erdman, D; Schneider, E; Hicks, LA; McCullers, JA; Pavia, AT; Edwards, KM; Finelli, L	Community-Acquired Pneumonia Requiring Hospitalization among US Adults	NEW ENGLAND JOURNAL OF MEDICINE		POLYMERASE-CHAIN-REACTION; PNEUMOCOCCAL CONJUGATE VACCINE; IMMUNIZATION PRACTICES ACIP; ACUTE RESPIRATORY-INFECTION; MYCOPLASMA-PNEUMONIAE; CHLAMYDIA-PNEUMONIAE; ADVISORY-COMMITTEE; REACTION ASSAYS; DIAGNOSIS; VIRUSES	BACKGROUND Community-acquired pneumonia is a leading infectious cause of hospitalization and death among U.S. adults. Incidence estimates of pneumonia confirmed radio-graphically and with the use of current laboratory diagnostic tests are needed. METHODS We conducted active population-based surveillance for community-acquired pneumonia requiring hospitalization among adults 18 years of age or old…	2015
Banu, A; Hassan, MMN; Rajkumar, J; Srinivasa, S	Spectrum of bacteria associated with diabetic foot ulcer and biofilm formation: A prospective study	AUSTRALASIAN MEDICAL JOURNAL	Biofilm; diabetic foot ulcers; multidrug-resistant bacteria		Background India has the world's largest number of diabetics. Non-traumatic lower limb amputation is the most common devastating complication of diabetes, primarily due to diabetic foot ulcers (DFU) and diabetic foot infections (DFI). In India, the incidence of foot ulcers ranges from 8-17 per cent. DFIs are predominantly polymicrobial and multidrug-resistant (MDR) with the ability to form biofil…	2015
Jain, S; Williams, DJ; Arnold, SR; Ampofo, K; Bramley, AM; Reed, C; Stockmann, C; Anderson, EJ; Grijalva, CG; Self, WH; Zhu, YW; Patel, A; Hymas, W; Chappell, JD; Kaufman, RA; Kan, JH; Dansie, D; Lenny, N; Hillyard, DR; Haynes, LM; Levine, M; Lindstrom, S; Winchell, JM; Katz, JM; Erdman, D; Schneider, E; Hicks, LA; Wunderink, RG; Edwards, KM; Pavia, AT; McCullers, JA; Finelli, L	Community-Acquired Pneumonia Requiring Hospitalization among US Children	NEW ENGLAND JOURNAL OF MEDICINE		POLYMERASE-CHAIN-REACTION; PNEUMOCOCCAL CONJUGATE VACCINE; MYCOPLASMA-PNEUMONIAE; VIRAL-INFECTIONS; PCR; DIAGNOSIS; ASSAYS; TESTS; IDENTIFICATION; EPIDEMIOLOGY	BACKGROUND Incidence estimates of hospitalizations for community-acquired pneumonia among children in the United States that are based on prospective data collection are limited. Updated estimates of pneumonia that has been confirmed radiographically and with the use of current laboratory diagnostic tests are needed. METHODS We conducted active population-based surveillance for community-acquired…	2015
Warhurst, G; Dunn, G; Chadwick, P; Blackwood, B; McAuley, D; Perkins, GD; McMullan, R; Gates, S; Bentley, A; Young, D; Carlson, GL; Dark, P	Rapid detection of health-care-associated bloodstream infection in critical care using multipathogen real-time polymerase chain reaction technology: a diagnostic accuracy study and systematic review	HEALTH TECHNOLOGY ASSESSMENT		LIGHTCYCLER SEPTIFAST(R) TEST; MULTIPLEX PCR; EMERGENCY-DEPARTMENT; CONSENSUS CONFERENCE; MOLECULAR DIAGNOSIS; PATHOGEN DETECTION; ILL PATIENTS; SEPSIS; BACTEREMIA; ASSAY	Background: There is growing interest in the potential utility of real-time polymerase chain reaction (PCR) in diagnosing bloodstream infection by detecting pathogen deoxyribonucleic acid (DNA) in blood samples within a few hours. SeptiFast (Roche Diagnostics GmBH, Mannheim, Germany) is a multipathogen probe-based system targeting ribosomal DNA sequences of bacteria and fungi. It detects and iden…	2015
Görgeç, S; Kuzucu, Ç; Otlu, B; Yetkin, F; Ersoy, Y	Investigation of Beta-Lactamase Genes and Clonal Relationship Among the Extended-Spectrum Beta-Lactamase Producing Nosocomial Escherichia coli Isolates	MIKROBIYOLOJI BULTENI	Escherichia coli; beta-lactamase; CTX-M; clonal relationship	KLEBSIELLA SPP. STRAINS; IN-VITRO ACTIVITY; EPIDEMIOLOGY; RESISTANCE; ERTAPENEM	Extended-spectrum beta-lactamase (ESBL) producing microorganisms currently cause a major problem. Among theseCTX-M beta-lactamase producing Escherichia coli has also disseminated worldwide as an important cause of both nosocomial and community-acquired infections. The aims of this study were to determine the prevalence of the beta-lactamase genes, antibiotic susceptibilities and clonal relationsh…	2015
Pereira, VC; Riboli, DFM; da Cunha, MDRD	Characterization of the clonal profile of MRSA isolated in neonatal and pediatric intensive care units of a University Hospital	ANNALS OF CLINICAL MICROBIOLOGY AND ANTIMICROBIALS	Nosocomial infections; NICU; PICU; MRSA	RESISTANT STAPHYLOCOCCUS-AUREUS; METHICILLIN; CASSETTE; CHROMOSOME; BRAZIL; DNA; IDENTIFICATION; INFECTIONS; PREVALENCE; BACTEREMIA	Background: Methicillin-resistant Staphylococcus aureus (MRSA) are important pathogens in neonatal and pediatric intensive care units, which can cause severe infections in hospitalized children. Detection of the mecA gene and classification of the staphylococcal cassette chromosome mec (SCCmec) permit the characterization of MRSA strains isolated from infections caused by these microorganisms. In…	2014

## Sheet: Sheet2
Authors	Article Title	Source Title	Author Keywords	Keywords Plus	Abstract	Publication Year
Abban MK, Ayerakwa EA, Mosi L, Isawumi A.	The burden of hospital acquired infections and antimicrobial resistance	Heliyon	AMR mechanisms; Antimicrobial resistance; ESKAPE pathogens; Hospital care-associated infections; Nosocomial infections; Polymyxins.	NA	The burden of Hospital care-associated infections (HCAIs) is becoming a global concern. This is compounded by the emergence of virulent and high-risk bacterial strains such as "ESKAPE" pathogens - (Enterococcus faecium, Staphylococcus aureus, Klebsiella pneumoniae, Acinetobacter baumannii, Pseudomonas aeruginosa and Enterobacter species), especially within Intensive care units (ICUs) that house h…	2023
G. Aygün, O. Demirkiran, T. Utku, B. Mete, S. Ürkmez, M. Yılmaz, H. Yaşar, Y. Dikmen, R. Öztürk	Environmental contamination during a carbapenem-resistant Acinetobacter baumannii outbreak in an intensive care unit	Journal of Hospital Infection	Acinetobacter baumannii, carbapenem resistance, environmental contamination, ICU	NA	During a three-month period in 1999, 25 strains of carbapenem resistant Acinetobacter baumannii were isolated from 12 of 170 hospitalized intensive care unit (ICU) patients, of which 16 were considered to be clinically significant. These strains were indistinguishable by biotyping and antibiograms, but genotyping was not performed. Appropriate antibiotic treatment, isolation precautions, and infe…	2002
Azam MW, Khan AU.	Updates on the pathogenicity status of Pseudomonas aeruginosa.	Drug Discov Today	NA	NA	Pseudomonas aeruginosa is a pathogenic bacterial species that causes infections and diseases in both plants and animals, including several human diseases, especially in immune-compromised patients, and many hospital-acquired infections. Given that P. aeruginosa is an opportunistic pathogen, the occurrence of antimicrobial resistance makes it difficult to treat and eradicate. Antimicrobial resista…	2019
Bhatta, D. R., Hosuru Subramanya, S., Hamal, D., Shrestha, R., Gauchan, E., Basnet, S., Nayak, N., & Gokhale, S.	Bacterial contamination of neonatal intensive care units: How safe are the neonates?	Antimicrobial resistance and infection control	NA	NA	Background Intensive care units (ICU) are essential healthcare facility for life threatening conditions. Bacterial contamination of objects/instruments in ICU is an important source of nosocomial infections. This study is aimed to determine the level of bacterial contamination of instruments/objects which are commonly touched by healthcare workers and frequently come in contact with the neonates.…	2021
Borer, A., Gilad, J., Smolyakov, R., Eskira, S., Peled, N., Porat, N....Schlaeffer, F.	Cell Phones and Acinetobacter Transmission.	Emerging Infectious Diseases	NA	NA	NA	2005
Botelho J, Grosso F, Peixe L.	Antibiotic resistance in Pseudomonas aeruginosa - Mechanisms, epidemiology and evolution.	Drug Resist Updat	Antibiotic resistance; Fitness cost; Integrative and conjugative elements; Plasmids; Pseudomonas aeruginosa.	NA	Antibiotics are powerful drugs used in the treatment of bacterial infections. The inappropriate use of these medicines has driven the dissemination of antibiotic resistance (AR) in most bacteria. Pseudomonas aeruginosa is an opportunistic pathogen commonly involved in environmental- and difficult-to-treat hospital-acquired infections. This species is frequently resistant to several antibiotics, b…	2019
Bradshaw, W.J., Roberts, A.K., Shone, C.C. et al.	The structure of the S-layer of Clostridium difficile .	J. Cell Commun. Signal.	NA	NA	The nosocomially acquired pathogen Clostridium difficile is the primary causative agent of antibiotic associated diarrhoea and causes tens of thousands of deaths globally each year. C. difficile presents a paracrystalline protein array on the surface of the cell known as an S-layer. S-layers have been demonstrated to possess a wide range of important functions, which, combined with their inherent…	2017
Brinkwirth S, Ayobami O, Eckmanns T, Markwart R.	Hospital-acquired infections caused by enterococci: a systematic review and meta-analysis, WHO European Region, 1 January 2010 to 4 February 2020.	Euro Surveill.	Enterococcus spp.; Hospital-acquired infections; VRE; hospital-acquired infections; vancomycin-resistant Enterococcus spp..	NA	BackgroundHospital-acquired infections (HAI) caused by Enterococcus spp., especially vancomycin-resistant Enterococcusspp. (VRE), are of rising concern.AimWe summarised data on incidence, mortality and proportion of HAI caused by enterococci in the World Health Organization European Region.MethodsWe searched Medline and Embase for articles published between 1 January 2010 and 4 February 2020. Ran…	2021
Casey, A. L., Adams, D., Karpanen, T. J., Lambert, P. A., Cookson, B. D., Nightingale, P., Miruszenko, L., Shillam, R., Christian, P., & Elliott, T. S. J.	Role of copper in reducing hospital environment contamination.	Journal of Hospital Infection	Antimicrobial activity, CopperEnvironmental contamination, Healthcare-associated infection	NA	The environment may act as a reservoir for pathogens that cause healthcare-associated infections (HCAIs). Approaches to reducing environmental microbial contamination in addition to cleaning are thus worthy of consideration. Copper is well recognised as having antimicrobial activity but this property has not been applied to the clinical setting. We explored its use in a novel cross-over study on …	2010
Cassini, A., Högberg, L. D., Plachouras, D., Quattrocchi, A., Hoxha, A., Simonsen, G. S., ... & Hopkins, S	Attributable deaths and disability-adjusted life-years caused by infections with antibiotic-resistant bacteria in the EU and the European Economic Area in 2015: a population-level modelling analysis	The Lancet Infectious Diseases	NA	NA	Background Infections due to antibiotic-resistant bacteria are threatening modern health care. However, estimating their incidence, complications, and attributable mortality is challenging. We aimed to estimate the burden of infections caused by antibiotic-resistant bacteria of public health concern in countries of the EU and European Economic Area (EEA) in 2015, measured in number of cases, attr…	2019
M. Catalano, L.S. Quelle, P.E. Jeric, A. Di Martino, S.M. Maimone	Survival of Acinetobacter baumannii on bed rails during an outbreak and during sporadic cases	Journal of Hospital Infection	A. baumannii; dry vectors; molecular typing; outbreak, sporadic cases.	NA	Genotypic methods showed Acinetobacter baumannii biotype 9 genotype I to be the epidemic strain on an outbreak in an intensive care unit (ICU) which lasted from January to April of 1996. A cohort was established during March in which hospital personnel were assigned exclusively to A. baumannii infected or colonized patients. New patients were not admitted to the ICU until the last infected patien…	1999
Cattoir V, Giard JC.	Antibiotic resistance in Enterococcus faecium clinical isolates.	Expert Rev Anti Infect Ther.	NA	NA	The worldwide ratio of Enterococcus faecalis-Enterococcus faecium infections is currently changing in favor of E. faecium. Intrinsic and acquired antimicrobial resistance traits of this latter species can explain this evolution as well as the diffusion of hospital-adapted strains belonging to the clonal complex CC17. Like other enterococci, E. faecium is naturally resistant to cephalosporins and …	2014
Cresti, A., Baratta, P., De Sensi, F., Aloia, E., Sposato, B., & Limbruno, U.	Clinical Features and Mortality Rate of Infective Endocarditis in Intensive Care Unit: A Large-Scale Study and Literature Review	Anatolian Journal of Cardiology	NA	NA	Background: Large-scale multicentric studies reported that, despite advances in diagnosis, antibiotics, and surgical treatment, infective endocarditis (IE) in-hospital mortality remains high. Most data have been obtained from patients treated in infective disease wards, internal medicine, cardiology, or cardiac surgery departments and are therefore heterogeneous. The few studies focused on compli…	2024
Cristina, M. L., Sartini, M., & Spagnolo, A. M.	Serratia marcescens Infections in Neonatal Intensive Care Units (NICUs)	International Journal of Environmental Research and Public Health	Serratia marcescens; outbreaks; NICUs	NA	Serratia marcescens belongs to the family Enterobacteriaceae, which is commonly found in water, soil, animals, insects, plants. Although S. marcescens displays relatively low virulence, it causes nosocomial infections and outbreaks in severely immunocompromised or critically ill patients, particularly in settings such as intensive care units (ICUs), especially neonatal units (NICUs). This microor…	2019
Dancer, S. J.	Importance of the environment in meticillin-resistant Staphylococcus aureus acquisition: The case for hospital cleaning.	The Lancet Infectious Diseases	NA	NA	In the UK, we continue to debate the importance of hospital cleaning in relation to increasing numbers of patients acquiring meticillin-resistant Staphylococcus aureus (MRSA). However, there is little direct evidence for the effectiveness of cleaning because it has never been afforded scientific status. Hospital hygiene is usually assessed visually, but this does not necessarily correlate with mi…	2008
Davin-Regli, A., & Pagès, J.-M.	Enterobacter aerogenes and Enterobacter cloacae; versatile bacterial pathogens confronting antibiotic treatment.	Frontiers in Microbiology	NA	NA	Enterobacter aerogenes and E. cloacae have been reported as important opportunistic and multiresistant bacterial pathogens for humans during the last three decades in hospital wards. These Gram-negative bacteria have been largely described during several outbreaks of hospital-acquired infections in Europe and particularly in France. The dissemination of Enterobacter sp. is associated with the pre…	2015
Davis, R. J., Jensen, S. O., Van Hal, S., Espedido, B., Gordon, A., Farhat, R., & Chan, R.	Whole Genome Sequencing in Real-Time Investigation and Management of a Pseudomonas aeruginosa Outbreak on a Neonatal Intensive Care Unit.	Infection control and hospital epidemiology	NA	NA	OBJECTIVE To use whole genome sequencing to describe the likely origin of an outbreak of Pseudomonas aeruginosa in a neonatal unit. DESIGN Outbreak investigation. SETTING The neonatal intensive care unit service of a major obstetric tertiary referral center. PATIENTS Infants admitted to the neonatal unit who developed P. aeruginosa colonization or infection. METHODS We undertook whole genome sequ…	2015
De Oliveira, D. M. P., Forde, B. M., Kidd, T. J., Harris, P. N. A., Schembri, M. A., Beatson, S. A., Paterson, D. L., & Walker, M. J.	Antimicrobial Resistance in ESKAPE Pathogens.	Clinical Microbiology Reviews	NA	NA	Antimicrobial-resistant ESKAPE (Enterococcus faecium, Staphylococcus aureus, Klebsiella pneumoniae, Acinetobacter baumannii, Pseudomonas aeruginosa, and Enterobacter species) pathogens represent a global threat to human health. The acquisition of antimicrobial resistance genes by ESKAPE pathogens has reduced the treatment options for serious infections, increased the burden of disease, and increa…	2020
Edwardson, S., & Cairns, C.	Nosocomial infections in the ICU.	Anaesthesia & Intensive Care Medicine	Catheter-related infection, cross infection, intensive care, nosocomial infection, urinary tract infection, ventilator-associated pneumonia	NA	Nosocomial infections are a major cause of avoidable morbidity, mortality and extended length of stay in ICU. Prevention of these infections is key. Continual surveillance, audit and hand hygiene are therefore vital. The recent introduction of ‘care bundles’ grouping best practices for care of invasive devices have proven highly successful for reducing the rates of nosocomial infection in the ICU…	2019
Falk, P. S., Winnike, J., Woodmansee, C., Desai, M., & Mayhall, C. G.	Outbreak of Vancomycin-Resistant Enterococci in a Burn Unit.	Infection Control & Hospital Epidemiology	NA	NA	Objective: To investigate and control an outbreak of colonization and infection caused by vancomycin-resistant enterococci (VRE) in a burn intensive care unit (BICU). Design: Epidemiological investigation, including multiple point-prevalence culture surveys of patients and environment, cultures from hands of healthcare workers (HCWs), pulsed-field gel electrophoresis (PFGE) typing of patient and …	2000
Falvey, D. G., & Streifel, A. J.	Ten-year air sample analysis of Aspergillus prevalence in a university hospital	Journal of Hospital Infection	Aspergillus, Ventilation, Environmental air sampling, Immunocompromised host, Fungal sources, Hospital-acquired infections, Aspergillosis	NA	Airborne fungal samples were collected on a monthly basis for 10 years, from 1995 to 2005, at a tertiary university hospital. Paired samples were cultured at 25 and 37 °C. Data were interpreted according to the air filtration systems serving each location. Samples cultured at 37 °C from the patient care areas had a mean recovery of 18% of the mean recovery from outdoor air (22 versus 122 cfu/m3).…	2007
La Fauci, V., Genovese, C., Facciolà, A., Palamara, M. A. R., & Squeri, R.	Five-year microbiological monitoring of wards and operating theatres in southern Italy.	Journal of Preventive Medicine and Hygiene	Microbiological surveillance, HCAI, Operating rooms, Wards	NA	Introduction. Nosocomial infections are one of the greatest problems in public health. Several studies have highlighted the role played by the hospital environment as a possible source of transmission of nosocomial pathogens. Methods. A five-year monitoring of bacterial contamination on healthcare workers hands, surfaces most closely in contact with inpatient wards, operating theatres and "at res…	2017
José Garnacho-Montero, Jean-François Timsit.	Managing Acinetobacter baumannii infections.	Curr Opin Infect Dis.	NA	NA	Purpose of review: We reviewed recent data about epidemiology of Acinetobacter baumannii, resistance mechanisms, and therapeutic options for severe infections caused by multidrug-resistant strains. Recent findings: A. baumannii is a major cause of nosocomial infections affecting mainly to debilitating patients in the ICU, although the spread to regular wards and to long-term care facilities is in…	2019
Getachew, H., Derbie, A., & Mekonnen, D.	Surfaces and Air Bacteriology of Selected Wards at a Referral Hospital, Northwest Ethiopia: A Cross-Sectional Study.	International Journal of Microbiology	NA	NA	Background. The hospital environment is a source of medically important pathogens that are mostly multidrug resistant (MDR) and posing a major therapeutic challenge. The aim of this study was to assess the surface and air bacteriology of selected wards at Felege Hiwot Referral Hospital (FHRH), Northwest Ethiopia. Methods. A cross-sectional study was carried out from 15th February to 30th April 20…	2018
Hayden, M. K., Blom, D. W., Lyle, E. A., Moore, C. G., & Weinstein, R. A.	Risk of Hand or Glove Contamination After Contact With Patients Colonized With Vancomycin-Resistant Enterococcus or the Colonized Patients’ Environment.	Infection Control & Hospital Epidemiology	NA	NA	Objective. To estimate the level of hand or glove contamination with vancomycin-resistant enterococci (VRE) among healthcare workers (HCWs) who touch a patient colonized with VRE and/or the colonized patient's environment during routine care. Design. Structured observational study. Setting. Medical intensive care unit of a 700-bed, tertiary-care teaching hospital. Participants. VRE-colonized pati…	2015
Howden, B. P., Giulieri, S. G., Wong Fok Lung, T., Baines, S. L., Sharkey, L. K., Lee, J. Y. H., Hachani, A., Monk, I. R., & Stinear, T. P.	Staphylococcus aureus host interactions and adaptation.	Nature Reviews Microbiology	NA	NA	Invasive Staphylococcus aureus infections are common, causing high mortality, compounded by the propensity of the bacterium to develop drug resistance. S. aureus is an excellent case study of the potential for a bacterium to be commensal, colonizing, latent or disease-causing; these states defined by the interplay between S. aureus and host. This interplay is multidimensional and evolving, exempl…	2023
Jabłońska-Trypuć, A., Makuła, M., Włodarczyk-Makuła, M., Wołejko, E., Wydro, U., Serra-Majem, L., & Wiater, J.	Inanimate Surfaces as a Source of Hospital Infections Caused by Fungi, Bacteria and Viruses with Particular Emphasis on SARS-CoV-2.	International Journal of Environmental Research and Public Health	nosocomial infections; inanimate surfaces; virus; bacteria; fungi; SARS-CoV-2	NA	The carriers of nosocomial infections are the hands of medical personnel and inanimate surfaces. Both hands and surfaces may be contaminated as a result of contact with the patient, their body fluids, and touching contaminated surfaces in the patient’s surroundings. Visually clean inanimate surfaces are an important source of pathogens. Microorganisms have properties thanks to which they can surv…	2022
Jiang, Y., Ding, Y., Wei, Y., Jian, C., Liu, J., & Zeng, Z	Carbapenem-resistant Acinetobacter baumannii: A challenge in the intensive care unit.	Frontiers in Microbiology	NA	NA	Carbapenem-resistant Acinetobacter baumannii (CRAB) has become one of the leading causes of healthcare-associated infections globally, particularly in intensive care units (ICUs). Cross-transmission of microorganisms between patients and the hospital environment may play a crucial role in ICU-acquired CRAB colonization and infection. The control and treatment of CRAB infection in ICUs have been r…	2022
Johnson, J., & Quach, C.	Outbreaks in the Neonatal Intensive Care Unit: A Review of the Literature.	Current Opinion in Infectious Diseases	NA	NA	NICUs must be vigilant in identifying outbreaks, conduct comprehensive investigations, and implement targeted infection prevention and control strategies. Molecular epidemiology capacities are an essential element in outbreak investigation. More studies are needed to determine the added value of active colonization screening and their impact on outbreak development.	2017
Johnson, J., Akinboyo, I. C., & Schaffzin, J. K.	Infection Prevention in the Neonatal Intensive Care Unit.	Clinics in Perinatology	Health care–associated infections, Central line–associated bloodstream infections, Low- and middle-income countries, Environmental cleaning, Disinfection	NA	Hospitalized neonates are uniquely vulnerable to health care–associated infections (HAIs), which are associated with increased mortality, increased length of stay, and health care costs, and risk of neurodevelopmental disability among survivors.1–3 In the United States, incidence of neonatal central line–associated bloodstream infections (CLABSIs) declined significantly from 2007 to 2012, althoug…	2021
Kachrimanidou, M., & Malisiovas, N.	Clostridium difficile Infection: A Comprehensive Review.	Critical Reviews in Microbiology	diarrhea, pseudomembranous colitis, epidemiology, diagnosis, treatment, genotyping	NA	Clostridium difficile is one of the most important causes of healthcare acquired diarrhea. The disease spectrum caused by C. difficile infection ranges from mild, self-limited, illness to a severe, life-threatening colitis. The incidence of C. difficile associated disease has risen dramatically over the last decade, leading to increased research interest aiming at the discovery of new virulence f…	2011
Kaper, J. B., Nataro, J. P., & Mobley, H. L. T.	Pathogenic Escherichia coli.	Nature Reviews Microbiology	NA	NA	Few microorganisms are as versatile as Escherichia coli. An important member of the normal intestinal microflora of humans and other mammals, E. coli has also been widely exploited as a cloning host in recombinant DNA technology. But E. coli is more than just a laboratory workhorse or harmless intestinal inhabitant; it can also be a highly versatile, and frequently deadly, pathogen. Several diffe…	2004
Katzenberger, R. H., Rösel, A., & Vonberg, R.-P.	Bacterial survival on inanimate surfaces: A field study.	BMC Research Notes	NA	NA	Objective Environmental surfaces may serve as potential reservoirs for nosocomial pathogens and facilitate transmissions via contact depending on its tenacity. This study provides data on survival kinetics of the most important nosocomial bacteria on a panel of commonly used surfaces. Type strains of S. aureus, K. pneumoniae, P. aeruginosa, A. baumannii, S. marcescens, E. faecium, E. coli, and E.…	2021
Kazanowski, M., Smolarek, S., Kinnarney, F., & Grzebieniak, Z.	Clostridium difficile: Epidemiology, diagnostic and therapeutic possibilities—a systematic review.	Techniques in Coloproctology	NA	NA	This literature review looks at the epidemiology, clinical manifestations, diagnostics and current medical and surgical management of Clostridium difficile (C. difficile) infection. A literature search of PubMed and Cochrane database regarding C. difficile infection was performed. Information was extracted from 43 published articles from 2000 to the present day which met inclusion criteria. C. di…	2014
Yousaf Kazmi, S.	The etymology of microbial nomenclature and the diseases these cause in a historical perspective.	Saudi Journal of Biological Sciences	Etymology, Infectious diseases, Microbial nomenclature, Phenotypic characteristics, Eponym, Toponym	NA	When the hunter-gatherers finally started settling down as farmers, infectious diseases started scourging them. The earlier humans could differentiate sporadic diseases like tooth decay, tumors, etc., from the infectious diseases that used to cause outbreaks and epidemics. The earliest comprehension of infectious diseases was primarily based on religious background and myths, but as human knowled…	2022
Koibuchi, H., Kotani, K., & Taniguchi, N.	Ultrasound probes as a possible vector of bacterial transmission.	Medical Ultrasonography	ultrasound , disinfection , bacterial transmission , transducer	NA	Ultrasound probes are usually in a direct contact with the skin when used for detecting pathologic abnormalities. The probe could be a vector of bacterial transmission, but there have been few studies on this topic. We have made such studies, briefly reviewing 1) the conditions governing a possible bacterial transmission by probe, 2) the deterioration of an ultrasound probe by alcohol disinfectio…	2013
Kreitmann, L., Helms, J., Martin-Loeches, I., Salluh, J., Poulakou, G., Pène, F., & Nseir, S.	ICU-acquired infections in immunocompromised patients.	Intensive Care Medicine	NA	NA	Immunocompromised patients account for an increasing proportion of the typical intensive care unit (ICU) case-mix. Because of the increased availability of new drugs for cancer and auto-immune diseases, and improvement in the care of the most severely immunocompromised ICU patients (including those with hematologic malignancies), critically ill immunocompromised patients form a highly heterogeneo…	2024
Lange, I., Edel, B., Dawczynski, K., Proquitté, H., Pletz, M. W., Kipp, F., & Stein, C.	Influence of the Incubator as Direct Patient Environment on Bacterial Colonization of Neonates.	Microorganisms	healthcare-associated infections; colonization; neonatal care; incubator; whole genome sequencing; infection control; transmission; patient environment	NA	Background: Preventing healthcare-associated infections (HAI) in neonatal intensive care units is a challenge of highest priority. For further insight into the incubator as direct patient environment and potential source for contamination, we present data correlating microbiological samples of very low birthweight infants in the form of colonization results of surveillance screenings with samples…	2021
Lestari, T., Ryll, S., & Kramer, A.	Microbial contamination of manually reprocessed, ready to use ECG lead wire in intensive care units.	GMS Hyg Infect Control	ECG lead wire, microbial contamination, ICU, PACU	NA	Background: A number of studies have shown that non-critical medical devices can be contaminated with pathogens, including those resistant to antibiotics and thus become a potential vector for transmission. Electrocardiography (ECG) lead wire are non-critical medical device which are always attached on patient skin during their stay in intensive care unit (ICU). In view of the patient’s critical …	2013
Levin, P. D., Shatz, O., Sviri, S., Moriah, D., Or-Barbash, A., Sprung, C. L., Moses, A. E., & Block, C.	Contamination of Portable Radiograph Equipment With Resistant Bacteria in the ICU.	Chest	NA	NA	Background Approximately 15% of nosocomial infections in the ICU result from spread of bacteria on caregivers' hands. The routine chest radiograph provides an unexamined opportunity for bacterial spread: close contact with each patient and sequential examination of ICU patients. This study examined infection control procedures performed during routine chest radiographs, assessed whether resistant…	2009
Li, L., Gao, X., Li, M., Liu, Y., Ma, J., Wang, X., Yu, Z., Cheng, W., Zhang, W., Sun, H., Song, X., & Wang, Z.	Relationship between biofilm formation and antibiotic resistance of Klebsiella pneumoniae and updates on antibiofilm therapeutic strategies.	Frontiers in Cellular and Infection Microbiology	NA	NA	Klebsiella pneumoniae is a Gram-negative bacterium within the Enterobacteriaceae family that can cause multiple systemic infections, such as respiratory, blood, liver abscesses and urinary systems. Antibiotic resistance is a global health threat and K. pneumoniae warrants special attention due to its resistance to most modern day antibiotics. Biofilm formation is a critical obstruction that enhan…	2024
Lin, J. Y., Zhu, Z. C., Zhu, J., Chen, L., & Du, H.	Antibiotic heteroresistance in Klebsiella pneumoniae: Definition, detection methods, mechanisms, and combination therapy.	Microbiological Research	Klebsiella pneumoniae, Heteroresistance, Antibiotic resistance, Population analysis profile, Combination therapy	NA	Klebsiella pneumoniae is a common opportunistic pathogen that presents significant challenges in the treatment of infections due to its resistance to multiple antibiotics. In recent years, K. pneumoniae has been reported for the development of heteroresistance, a phenomenon where subpopulations of the susceptible bacteria exhibit resistance. This heteroresistance has been associated with increase…	2024
Lowy, F. D.	Staphylococcus aureus Infections.	New England Journal of Medicine	NA	NA	NA	1998
Makvana, S., & Krilov, L. R.	Escherichia coli Infections.	Pediatrics in Review	diarrhea, escherichia coli, escherichia coli infections, hemolytic-uremic syndrome, meningitis, septicemia, urinary tract infections, escherichia coli o157, traveler's diarrhea	NA	NA	2015
Manian, F. A., Griesenauer, S., Senkel, D., Setzer, J. M., Doll, S. A., Perry, A. M., & Wiechens, M.	Isolation of Acinetobacter baumannii Complex and Methicillin-Resistant Staphylococcus aureus from Hospital Rooms Following Terminal Cleaning and Disinfection: Can We Do Better?	Infection Control & Hospital Epidemiology	NA	NA	Abstract Objective. To study the frequency of isolation of Acinetobacter baumannii complex (ABC) and methicillin-resistant Staphylococcus aureus (MRSA) from surfaces of rooms newly vacated by patients with multidrug-resistant (MDR) ABC following various rounds of routine terminal cleaning and disinfection (C/D) with bleach or 1 round of C/D followed by hydrogen peroxide vapor (HPV) treatment. Set…	2011
Matsuo, M., Oie, S., & Furukawa, H.	Contamination of blood pressure cuffs by methicillin-resistant Staphylococcus aureus and preventive measures.	Irish Journal of Medical Science	NA	NA	Background Although blood pressure cuffs are commonly used and shared in medical facilities, their routine disinfection is performed infrequently. Aims We investigated the contamination of blood pressure cuffs by methicillin-resistant Staphylococcus aureus (MRSA). Methods The MRSA level on the inner side (the surface in contact with patients’ skin) of blood pressure cuffs used in the wards and ou…	2013
Mestrovic, T., Aguilar, G. R., Swetschinski, L. R., Ikuta, K. S., Gray, A. P., Weaver, N. D., Han, C., Wool, E. E., Hayoon, A. G., Hay, S. I., Dolecek, C., Sartorius, B., Murray, C. J. L., Addo, I. Y., Ahinkorah, B. O., Ahmed, A., Aldeyab, M. A., Allel, K., Ancuceanu, R., … Naghavi, M.	The burden of bacterial antimicrobial resistance in the WHO European region in 2019: A cross-country systematic analysis.	The Lancet Public Health	NA	NA	Background Antimicrobial resistance (AMR) represents one of the most crucial threats to public health and modern health care. Previous studies have identified challenges with estimating the magnitude of the problem and its downstream effect on human health and mortality. To our knowledge, this study presents the most comprehensive set of regional and country-level estimates of AMR burden in the W…	2022
Mezzatesta, M. L., Gona, F., & Stefani, S.	Enterobacter cloacae complex: Clinical impact and emerging antibiotic resistance.	Future Microbiology	antibiotic resistance, E. cloacae complex, Enterobacter asburiae, Enterobacter cloacae, Enterobacter hormaechei, Enterobacter kobei, Enterobacter ludwigii, Enterobacter nimipressuralis	NA	Species of the Enterobacter cloacae complex are widely encountered in nature, but they can act as pathogens. The biochemical and molecular studies on E. cloacae have shown genomic heterogeneity, comprising six species: Enterobacter cloacae, Enterobacter asburiae, Enterobacter hormaechei, Enterobacter kobei, Enterobacter ludwigii and Enterobacter nimipressuralis, E. cloacae and E. hormaechei are t…	2012
Morillo, Á., González, V., Aguayo, J., Carreño, C., Torres, M. J., Jarana, D., Artacho, M. J., Jiménez, F., Conde, M., & Aznar, J.	A six-month Serratia marcescens outbreak in a Neonatal Intensive Care Unit.	Enfermedades Infecciosas y Microbiologia Clinica	NA	NA	Objective To investigate a Serratia marcescens (S. marcescens) outbreak in a Neonatal Unit in a tertiary university hospital. Methods Descriptive study of children admitted to the Unit with S. marcescens infection from November 2012 to March 2013. Conventional microbiological methods for clinical and environmental samples were used. The clonal relationship between all available isolates was estab…	2016
Mulani, M. S., Kamble, E. E., Kumkar, S. N., Tawre, M. S., & Pardesi, K. R.	Emerging Strategies to Combat ESKAPE Pathogens in the Era of Antimicrobial Resistance: A Review.	Frontiers in Microbiology	NA	NA	The acronym ESKAPE includes six nosocomial pathogens that exhibit multidrug resistance and virulence: Enterococcus faecium, Staphylococcus aureus, Klebsiella pneumoniae, Acinetobacter baumannii, Pseudomonas aeruginosa, and Enterobacter spp. Persistent use of antibiotics has provoked the emergence of multidrug resistant (MDR) and extensively drug resistant (XDR) bacteria, which render even the mos…	2019
Mulcahy, L. R., Isabella, V. M., & Lewis, K.	Pseudomonas aeruginosa Biofilms in Disease.	Microbial Ecology	NA	NA	Pseudomonas aeruginosa is a ubiquitous organism that is the focus of intense research because of its prominent role in disease. Due to its relatively large genome and flexible metabolic capabilities, this organism exploits numerous environmental niches. It is an opportunistic pathogen that sets upon the human host when the normal immune defenses are disabled. Its deadliness is most apparent in cy…	2013
Munoz-Price, L. S., Arheart, K. L., Mills, J. P., Cleary, T., DePascale, D., Jimenez, A., Fajardo-Aquino, Y., Coro, G., Birnbach, D. J., & Lubarsky, D. A.	Associations between bacterial contamination of health care workers’ hands and contamination of white coats and scrubs	American Journal of Infection Control	Hand contamination, Acinetobacter	NA	Background Uniforms are potential reservoirs for hospital organisms, potentially reinfecting the hands of health care workers (HCWs). The study aimed to determine the association between the bacterial contamination of HCWs' hands and uniforms (white coats and scrubs). Methods HCWs working in 5 intensive care units had cultures obtained from their hands and uniforms (white coats or scrubs). Pathog…	2012
Murray, C. J. L., Ikuta, K. S., Sharara, F., Swetschinski, L., Aguilar, G. R., Gray, A., Han, C., Bisignano, C., Rao, P., Wool, E., Johnson, S. C., Browne, A. J., Chipeta, M. G., Fell, F., Hackett, S., Haines-Woodhouse, G., Hamadani, B. H. K., Kumaran, E. A. P., McManigal, B., … Naghavi, M.	Global burden of bacterial antimicrobial resistance in 2019: A systematic analysis.	The Lancet	NA	NA	Background Antimicrobial resistance (AMR) poses a major threat to human health around the world. Previous publications have estimated the effect of AMR on incidence, deaths, hospital length of stay, and health-care costs for specific pathogen–drug combinations in select locations. To our knowledge, this study presents the most comprehensive estimates of AMR burden to date. Methods We estimated de…	2022
Nguyen, M., & Joshi, S. G.	Carbapenem resistance in Acinetobacter baumannii, and their importance in hospital-acquired infections: A scientific review.	Journal of Applied Microbiology	Acinetobacter baumannii, antimicrobial susceptibility test, biofilm, carbapenem, carbapenem resistance, genotypic test, infection control, mobile genetic element, multidrug resistance, nosocomial infection, phenotypic test, virulence	NA	Carbapenem is an important therapy for serious hospital‐acquired infections and for the care of patients affected by multidrug‐resistant organisms, specifically Acinetobacter baumannii; however, with the global increase of carbapenem‐resistant A. baumannii, this pathogen has significantly threatened public health. Thus, there is a pressing need to better understand this pathogen in order to devel…	2021
Ondusko, D. S., & Nolt, D.	Staphylococcus aureus.	Pediatrics In Review	methicillin-resistant staphylococcus aureus, staphylococcus aureus, microbial colonization, vancomycin, clindamycin, toxins	NA	Staphylococcus aureus is a bacterium that can cause a variety of illnesses through suppurative or nonsuppurative (toxin-mediated) means. S aureus is a common cause of skin and skin structure infections as well as osteoarticular infections in the pediatric population. S aureus is also identified in cases of septicemia, infective endocarditis, pneumonia, ocular infections, and central nervous syste…	2018
Otter, J. A., Zhou, J., Price, J. R., Reeves, L., Zhu, N., Randell, P., Sriskandan, S., Barclay, W. S., & Holmes, A. H.	SARS-CoV-2 surface and air contamination in an acute healthcare setting during the first and second pandemic waves.	Journal of Hospital Infection	Keywords: Air contamination; COVID-19; Infection prevention and control; SARS-CoV-2; Surface contamination; Transmission; Variants of concern.	NA	Background: Surfaces and air in healthcare facilities can be contaminated with severe acute respiratory syndrome coronavirus-2 (SARS-CoV-2). Previously, the authors identified SARS-CoV-2 RNA on surfaces and air in their hospital during the first wave of the coronavirus disease 2019 pandemic (April 2020). Aim: To explore whether the profile of SARS-CoV-2 surface and air contamination had changed b…	2023
Paganelli, F. L., Willems, R. J. L., Jansen, P., Hendrickx, A., Zhang, X., Bonten, M. J. M., & Leavis, H. L.	Enterococcus faecium Biofilm Formation: Identification of Major Autolysin AtlA Efm , Associated Acm Surface Localization, and AtlA Efm -Independent Extracellular DNA Release.	mBio	NA	NA	Enterococcus faecium is an important multidrug-resistant nosocomial pathogen causing biofilm-mediated infections in patients with medical devices. Insight into E. faecium biofilm pathogenesis is pivotal for the development of new strategies to prevent and treat these infections. In several bacteria, a major autolysin is essential for extracellular DNA (eDNA) release in the biofilm matrix, contrib…	2013
Park, D.-U., Yeom, J.-K., Lee, W. J., & Lee, K.-M.	Assessment of the Levels of Airborne Bacteria, Gram-Negative Bacteria, and Fungi in Hospital Lobbies.	International Journal of Environmental Research and Public Health,	hospital lobby; bacteria; fungi; Gram-negative bacteria (GNB)	NA	Aims: We assessed the levels of airborne bacteria, Gram-negative bacteria (GNB), and fungi in six hospital lobbies, and investigated the environmental and hospital characteristics that affected the airborne microorganism levels. Methods: An Andersen single-stage sampler equipped with appropriate nutrition plate agar was used to collect the samples. The three types of microorganisms were repeatedl…	2013
Qin, S., Xiao, W., Zhou, C., Pu, Q., Deng, X., Lan, L., Liang, H., Song, X., & Wu, M.	Pseudomonas aeruginosa: Pathogenesis, virulence factors, antibiotic resistance, interaction with host, technology advances and emerging therapeutics.	Signal Transduction and Targeted Therapy	NA	NA	Pseudomonas aeruginosa (P. aeruginosa) is a Gram-negative opportunistic pathogen that infects patients with cystic fibrosis, burn wounds, immunodeficiency, chronic obstructive pulmonary disorder (COPD), cancer, and severe infection requiring ventilation, such as COVID-19. P. aeruginosa is also a widely-used model bacterium for all biological areas. In addition to continued, intense efforts in und…	2022
Ragusa, R., Giorgianni, G., Faro, G., Lazzara, A., Bellia, M. A., & Marranzano, M.	Are Visitors Dangerous Carriers of Pathogens in The Hospital? An Observational Study in an University Hospital in Sicily.	Hospital Topics	HAI, environmental contamination, visitors, transmission of pathogens, surfaces	NA	The hospital environment has been suggested as having an important role in the transmission of health care-associated infections. The aim of this work is to clarify the possible role of visitors in environmental contamination at our hospital. The microbial load was determined by Rodac plate contact on flat surfaces and by swabs on uneven surfaces. A total of 137 samples were taken from four diffe…	2019
Rajput, A., Seif, Y., Choudhary, K. S., Dalldorf, C., Poudel, S., Monk, J. M., & Palsson, B. O.	Pangenome Analytics Reveal Two-Component Systems as Conserved Targets in ESKAPEE Pathogens.	mSystems	NA	NA	The two-component system (TCS) helps bacteria sense and respond to environmental stimuli through histidine kinases and response regulators. TCSs are the largest family of multistep signal transduction processes, and they are involved in many important cellular processes such as antibiotic resistance, pathogenicity, quorum sensing, osmotic stress, and biofilms. Here, we perform the first comprehen…	2012
Righi, E., Mutters, N. T., Guirao, X., del Toro, M. D., Eckmann, C., Friedrich, A. W., Giannella, M., Kluytmans, J., Presterl, E., Christaki, E., Cross, E. L. A., Visentin, A., Sganga, G., Tsioutis, C., & Tacconelli, E.	ESCMID/EUCIC clinical practice guidelines on perioperative antibiotic prophylaxis in patients colonized by multidrug-resistant Gram-negative bacteria before surgery.	Clinical Microbiology and Infection	ESCMID, GRADE, Multidrug-resistant Gram-negative bacteria, Perioperative antibiotic prophylaxis, Rectal colonization, Surgical site infections	NA	Scope The aim of the guidelines is to provide recommendations on perioperative antibiotic prophylaxis (PAP) in adult inpatients who are carriers of multidrug-resistant Gram-negative bacteria (MDR-GNB) before surgery. Methods These evidence-based guidelines were developed after a systematic review of published studies on PAP targeting the following MDR-GNB: extended-spectrum cephalosporin-resistan…	2023
Robakowska, M., Bronk, M., Tyrańska-Fobke, A., Ślęzak, D., Kraszewski, J., & Balwicki, Ł.	Patient Safety Related to Microbiological Contamination of the Environment of a Multi-Profile Clinical Hospital.	International Journal of Environmental Research and Public Health	infection prevention and control; surveillance of infections; epidemiology of infections	NA	Nosocomial infections pose a serious burden for hospitals, patients, and the entire society. The aim of the study was to assess the microbiological cleanliness of the hospital environment through quantitative and qualitative analysis of microbiological contamination of air and surfaces in inpatient treatment facilities, based on the example of a large clinical hospital in Poland. Data were collec…	2021
Rose, M., Landman, D., & Quale, J.	Are community environmental surfaces near hospitals reservoirs for gram-negative nosocomial pathogens?	American Journal of Infection Control	Acinetobacter, Environmental contamination	NA	Background Hospital visitors and staff visit neighboring businesses, creating the potential for contamination of surfaces with hospital flora. Methods Cultures were obtained from environmental surfaces in hospital lobbies and the surrounding community of 6 hospitals in Brooklyn, NY. As a control, cultures were taken from surfaces >1.5 miles from any hospital. Screening for β-lactamases was done b…	2014
Roux, D., Aubier, B., Cochard, H., Quentin, R., & van der Mee-Marquet, N.	Contaminated sinks in intensive care units: An underestimated source of extended-spectrum beta-lactamase-producing Enterobacteriaceae in the patient environment.	Journal of Hospital Infection	Contamination, Extended-spectrum beta-lactamase-producing Enterobacteriaceae (ESBLE), Handwashing, Intensive care unit, Sink	NA	Background Extended-spectrum beta-lactamase-producing Enterobacteriaceae (ESBLE) outbreaks in intensive care units (ICUs) associated with contaminated handwashing sinks have been reported. Aim To conduct a regional study to assess whether handwashing sinks in 135 ICU patient rooms are a potential source of contamination, and to identify factors associated with an increased risk of sink contaminat…	2013
Russotto, V., Cortegiani, A., Raineri, S. M., & Giarratano, A.	Bacterial contamination of inanimate surfaces and equipment in the intensive care unit.	Journal of Intensive Care	NA	NA	Intensive care unit (ICU)-acquired infections are a challenging health problem worldwide, especially when caused by multidrug-resistant (MDR) pathogens. In ICUs, inanimate surfaces and equipment (e.g., bedrails, stethoscopes, medical charts, ultrasound machine) may be contaminated by bacteria, including MDR isolates. Cross-transmission of microorganisms from inanimate surfaces may have a signific…	2015
Rutala, W. A., White, M. S., Gergen, M. F., & Weber, D. J.	Bacterial Contamination of Keyboards: Efficacy and Functional Impact of Disinfectants.	Infection Control & Hospital Epidemiology	NA	NA	Background. Computers are ubiquitous in the healthcare setting and have been shown to be contaminated with potentially pathogenic microorganisms. This study was performed to determine the degree of microbial contamination, the efficacy of different disinfectants, and the cosmetic and functional effects of the disinfectants on the computer keyboards. Methods. We assessed the effectiveness of 6 dif…	2006
Salm, F., Deja, M., Gastmeier, P., Kola, A., Hansen, S., Behnke, M., Gruhl, D., & Leistner, R.	Prolonged outbreak of clonal MDR Pseudomonas aeruginosa on an intensive care unit: Contaminated sinks and contamination of ultra-filtrate bags as possible route of transmission?	Antimicrobial Resistance & Infection Control	NA	NA	Background We report on an outbreak in a surgical, interdisciplinary intensive care unit (ICU) of a tertiary care hospital. We detected a cluster of ICU patients colonized or infected with multidrug-resistant Pseudomonas aeruginosa. We established an outbreak investigation team, performed an exploratory epidemiological analysis and initiated an epidemiology-based intervention. Methods As part of …	2016
Sebaihia, M., Wren, B. W., Mullany, P., Fairweather, N. F., Minton, N., Stabler, R., Thomson, N. R., Roberts, A. P., Cerdeño-Tárraga, A. M., Wang, H., Holden, M. T., Wright, A., Churcher, C., Quail, M. A., Baker, S., Bason, N., Brooks, K., Chillingworth, T., Cronin, A., … Parkhill, J.	The multidrug-resistant human pathogen Clostridium difficile has a highly mobile, mosaic genome.	Nature Genetics	NA	NA	We determined the complete genome sequence of Clostridium difficile strain 630, a virulent and multidrug-resistant strain. Our analysis indicates that a large proportion (11%) of the genome consists of mobile genetic elements, mainly in the form of conjugative transposons. These mobile elements are putatively responsible for the acquisition by C. difficile of an extensive array of genes involved …	2006
Shokoohi, H., Armstrong, P., & Tansek, R.	Emergency department ultrasound probe infection control: Challenges and solutions.	Open Access Emergency Medicine	ultrasound probe, Staphylococcus aureus, disinfection, infection risk, endocavitary probe, human papilloma virus	NA	Point-of-care ultrasound (US) has become a cornerstone in the diagnosis and treatment of patients in the emergency department (ED). Despite the beneficial impact on patient care, concern exists over repeat use of probes and the role as a vector for pathogen transmission. US probes are used for various applications, with the level of infection risk, based on the Spaulding Classification, ranging f…	2015
Smits, W. K., Lyras, D., Lacy, D. B., Wilcox, M. H., & Kuijper, E. J.	Clostridium difficile infection.	Nature Reviews Disease Primers	NA	NA	Infection of the colon with the Gram-positive bacterium Clostridium difficile is potentially life threatening, especially in elderly people and in patients who have dysbiosis of the gut microbiota following antimicrobial drug exposure. C. difficile is the leading cause of health-care-associated infective diarrhoea. The life cycle of C. difficile is influenced by antimicrobial agents, the host imm…	2016
Sohn, A. H., Garrett, D. O., Sinkowitz-Cochran, R. L., Grohskopf, L. A., Levine, G. L., Stover, B. H., Siegel, J. D., Jarvis, W. R., & Pediatric Prevention Network	Prevalence of nosocomial infections in neonatal intensive care unit patients: Results from the first national point-prevalence survey.	The Journal of pediatrics	NA	NA	Objectives: Patients admitted to neonatal intensive care units (NICUs) are at high risk of nosocomial infection. We conducted a national multicenter assessment of nosocomial infections in NICUs to determine the prevalence of infections, describe associated risk factors, and help focus prevention efforts. Study design: We conducted a point prevalence survey of nosocomial infections in 29 Pediatric…	2001
Yi-Shan Sui, Gwo-Hwa Wan, Ya-Wen Chen, Hsiang-Lin Ku, Li-Pien Li, Chiu-Hsin Liu and Huei-Shin Mau	Effectiveness of Bacterial Disinfectants on Surfaces of Mechanical Ventilator	Respiratory care	NA	NA	BACKGROUND: Pathogens in healthcare settings can be transmitted via skin contact and environmental media. This study investigates bacterial contamination rate on surfaces of mechanical ventilator systems and bedside equipment. An experimental study evaluates the effectiveness of 75% alcohol in killing bacteria on surfaces. METHODS: Surface swab sampling was conducted on ventilator systems and pat…	2012	non lo vedo nelle ref
Tacconelli E, Carrara E, Savoldi A, Harbarth S, Mendelson M, Monnet DL, Pulcini C, Kahlmeter G, Kluytmans J, Carmeli Y, Ouellette M, Outterson K, Patel J, Cavaleri M, Cox EM, Houchens CR, Grayson ML, Hansen P, Singh N, Theuretzbacher U, Magrini N	the WHO Pathogens Priority List Working Group. Discovery, research, and development of new antibiotics: the WHO priority list of antibiotic-resistant bacteria and tuberculosis	Lancet Infect Dis.	NA	NA	Background: The spread of antibiotic-resistant bacteria poses a substantial threat to morbidity and mortality worldwide. Due to its large public health and societal implications, multidrug-resistant tuberculosis has been long regarded by WHO as a global priority for investment in new drugs. In 2016, WHO was requested by member states to create a priority list of other antibiotic-resistant bacteri…	2018
Tartari E, Tomczyk S, Pires D, Zayed B, Coutinho Rehse AP, Kariyo P, Stempliuk V, Zingg W, Pittet D, Allegranzi B.	Implementation of the infection prevention and control core components at the national level: a global situational analysis	J Hosp Infect	Antimicrobial resistance; Core components; Healthcare-associated infection; Implementation; Infection prevention and control; World Health Organization.	NA	BACKGROUND: Strengthening infection prevention and control (IPC) is essential to combat healthcare-associated infections, antimicrobial resistance, and to prevent and respond to outbreaks. AIM: To assess national IPC programmes worldwide according to the World Health Organization (WHO) IPC core components. METHODS: Between June 1st, 2017 and November 30th, 2018, a multi-country, cross-sectional s…	2021
Jianying Teng, Saber Imani, Aiping Zhou, Yuheng Zhao, Lailing Du, Shuli Deng, Jun Li, Qingjing Wang,	Combatting resistance: Understanding multi-drug resistant pathogens in intensive care units	Biomedicine & Pharmacotherapy	Nosocomial infections, Multi-drug resistant opportunistic pathogens, ESKAPE pathogens, Prevalence situation, Resistance mechanisms, Therapeutic strategies	NA	The escalating misuse and excessive utilization of antibiotics have led to the widespread dissemination of drug-resistant bacteria, posing a significant global healthcare crisis. Of particular concern is the increasing prevalence of multi-drug resistant (MDR) opportunistic pathogens in Intensive Care Units (ICUs), which presents a severe threat to public health and contributes to substantial morb…	2023
Ulger, F., Esen, S., Dilek, A. et al.	Are we aware how contaminated our mobile phones with nosocomial pathogens?	Ann Clin Microbiol Antimicrob	Intensive Care Unit Methylene Blue Mobile Phone Hand Hygiene Bacterial Contamination	NA	Background The objective of this study was to determine the contamination rate of the healthcare workers' (HCWs') mobile phones and hands in operating room and ICU. Microorganisms from HCWs' hands could be transferred to the surfaces of the mobile phones during their use. Methods 200 HCWs were screened; samples from the hands of 200 participants and 200 mobile phones were cultured. Results In tot…	2009
Vickery, K., Deva, A., Jacombs, A., Allan, J., Valente, P., & Gosbell, I. B.	Presence of biofilm containing viable multiresistant organisms despite terminal cleaning on clinical surfaces in an intensive care unit.	Journal of Hospital Infection	Biofilm, Enterococci, Environmental contamination, Healthcare-associated infections, Intensive care unit, Multiresistant organisms, Staphylococcus aureus	NA	Background Despite recent attention to surface cleaning and hand hygiene programmes, multiresistant organisms (MROs) continue to be isolated from the hospital environment. Biofilms, consisting of bacteria embedded in exopolymeric substances (EPS) are difficult to remove due to their increased resistance to detergents and disinfectants, and periodically release free-swimming planktonic bacteria ba…	2012
Whittington, A. M., Whitlow, G., Hewson, D., Thomas, C., & Brett, S. J.	Bacterial contamination of stethoscopes on the intensive care unit	Anaesthesia	NA	NA	We assessed how often bedside stethoscopes in our intensive care unit were cleaned and whether they became colonised with potentially pathogenic bacteria. On two separate days the 12 nurses attending the bedspaces were questioned about frequency of stethoscope cleaning on the unit and the bedside stethoscopes were swabbed before and after cleaning to identify colonising organisms. Twenty-two heal…	2009
Willems, R. J. L., Top, J., van Santen, M., Robinson, D. A., Coque, T. M., Baquero, F., Grundmann, H., & Bonten, M. J. M.	Global spread of vancomycin-resistant Enterococcus faecium from distinct nosocomial genetic complex.	Emerging Infectious Diseases	NA	NA	Vancomycin-resistant enterococci (VRE) have caused hospital outbreaks worldwide, and the vancomycin-resistance gene (vanA) has crossed genus boundaries to methicillin-resistant Staphylococcus aureus. Spread of VRE, therefore, represents an immediate threat for patient care and creates a reservoir of mobile resistance genes for other, more virulent pathogens. Evolutionary genetics, population stru…	2005
Wilson, A. P. R., Smyth, D., Moore, G., Singleton, J., Jackson, R., Gant, V., Jeanes, A., Shaw, S., James, E., Cooper, B., Kafatos, G., Cookson, B., Singer, M., & Bellingan, G.	The impact of enhanced cleaning within the intensive care unit on contamination of the near-patient environment with hospital pathogens: A randomized crossover study in critical care units in two hospitals.	Critical Care Medicine	NA	NA	Objectives: To determine the effect of enhanced cleaning of the near-patient environment on the isolation of hospital pathogens from the bed area and staff hands. Design: Prospective randomized crossover study over the course of 1 yr. Setting: Intensive care units at two teaching hospitals. Patients: There were 1252 patients staying during enhanced cleaning and 1331 staying during standard cleani…	2011
Li, Y., Liu, C., Xiao, W., Song, T., & Wang, S.	Incidence, Risk Factors, and Outcomes of Ventilator-Associated Pneumonia in Traumatic Brain Injury: A Meta-analysis	Neurocritical Care	NA	NA	Ventilator-associated pneumonia (VAP) is one of the most severe complications in patients with traumatic brain injury (TBI) and is considered a risk factor for poor outcomes. However, the incidence of VAP among patients with TBI reported in studies varies widely. What is more, the risk factors and outcomes of VAP are controversial. This study estimates the incidence, risk factors, and outcomes of…	2020
Zingg, W., Hopkins, S., Gayet-Ageron, A., Holmes, A., Sharland, M., Suetens, C., & ECDC PPS study group.	Health-care-associated infections in neonates, children, and adolescents: An analysis of paediatric data from the European Centre for Disease Prevention and Control point-prevalence survey.	The Lancet. Infectious Diseases	NA	NA	Background In 2011–12, the European Centre for Disease Prevention and Control (ECDC) held the first Europe-wide point-prevalence survey of health-care-associated infections in acute care hospitals. We analysed paediatric data from this survey, aiming to calculate the prevalence and type of health-care-associated infections in children and adolescents in Europe and to determine risk factors for in…	2017	si ripete 2 volte
